# Supplementary material for: Exploration of the VEGFR-2 inhibition activity of phthalazine derivatives: design, synthesis, cytotoxicity, ADMET, molecular docking and dynamic simulation
Source: Royal Society of Chemistry journal article supplement (doi:10.1039/d4ra03459g), 2024-01-01

HatemHusein-IXC-DMSO-H1  
HatemHusein-IXC-DMSO-H1

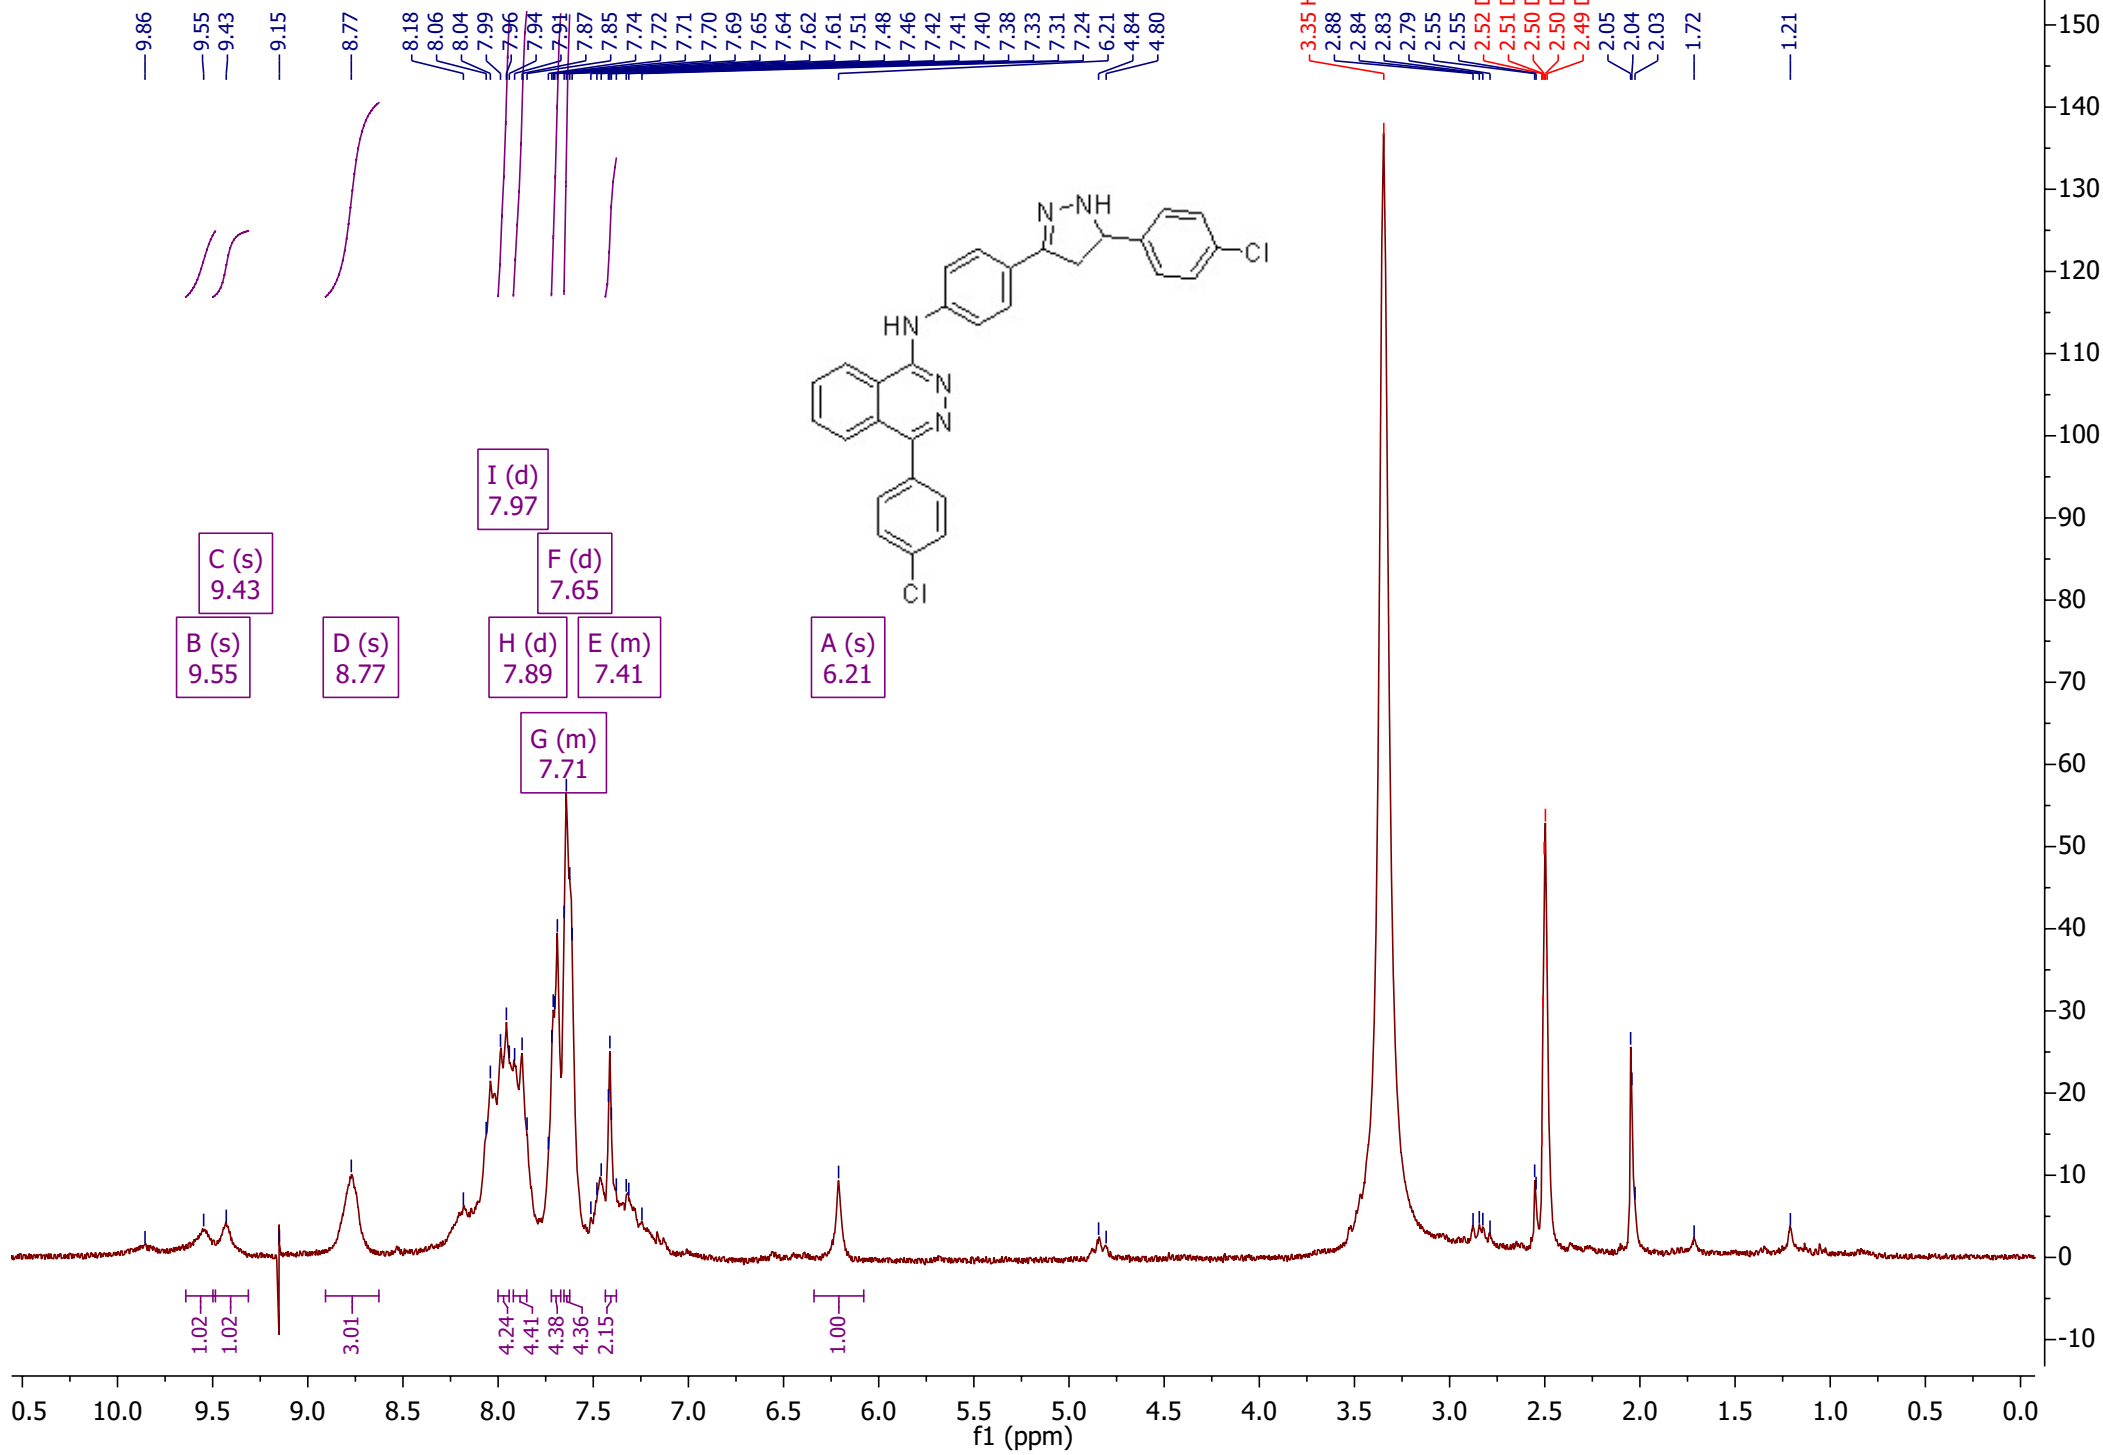

HatemHusein-IXd-DMSO-H1  
HatemHusein-IXd-DMSO-H1

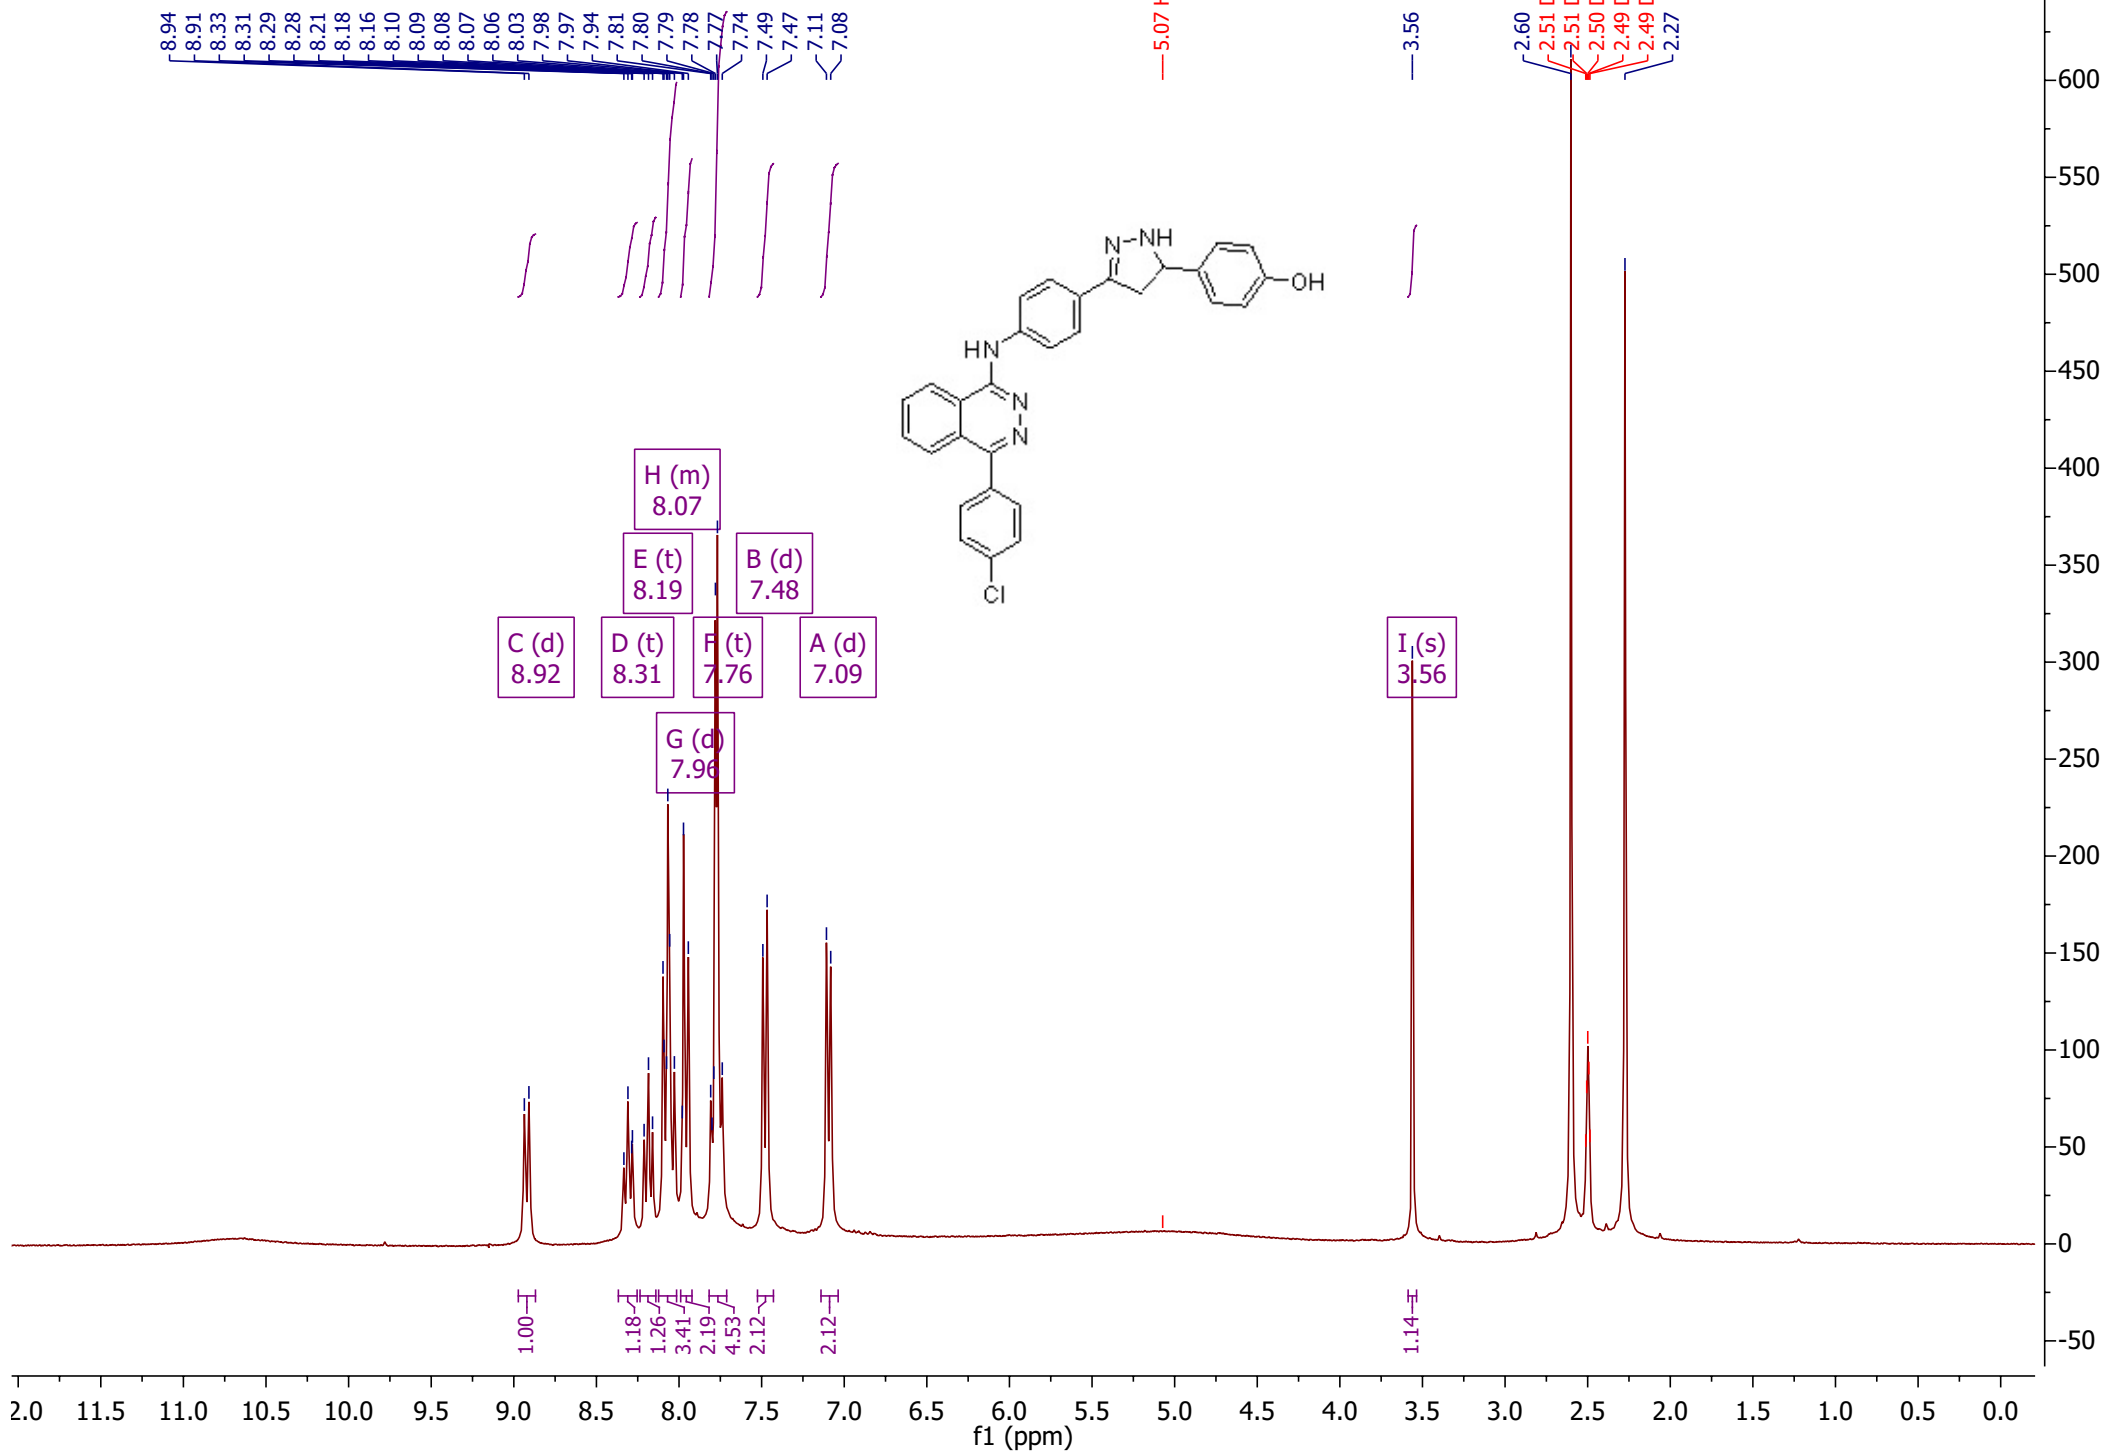

HatemHusein-IXe-DMSO-H1  
HatemHusein-IXe-DMSO-H1

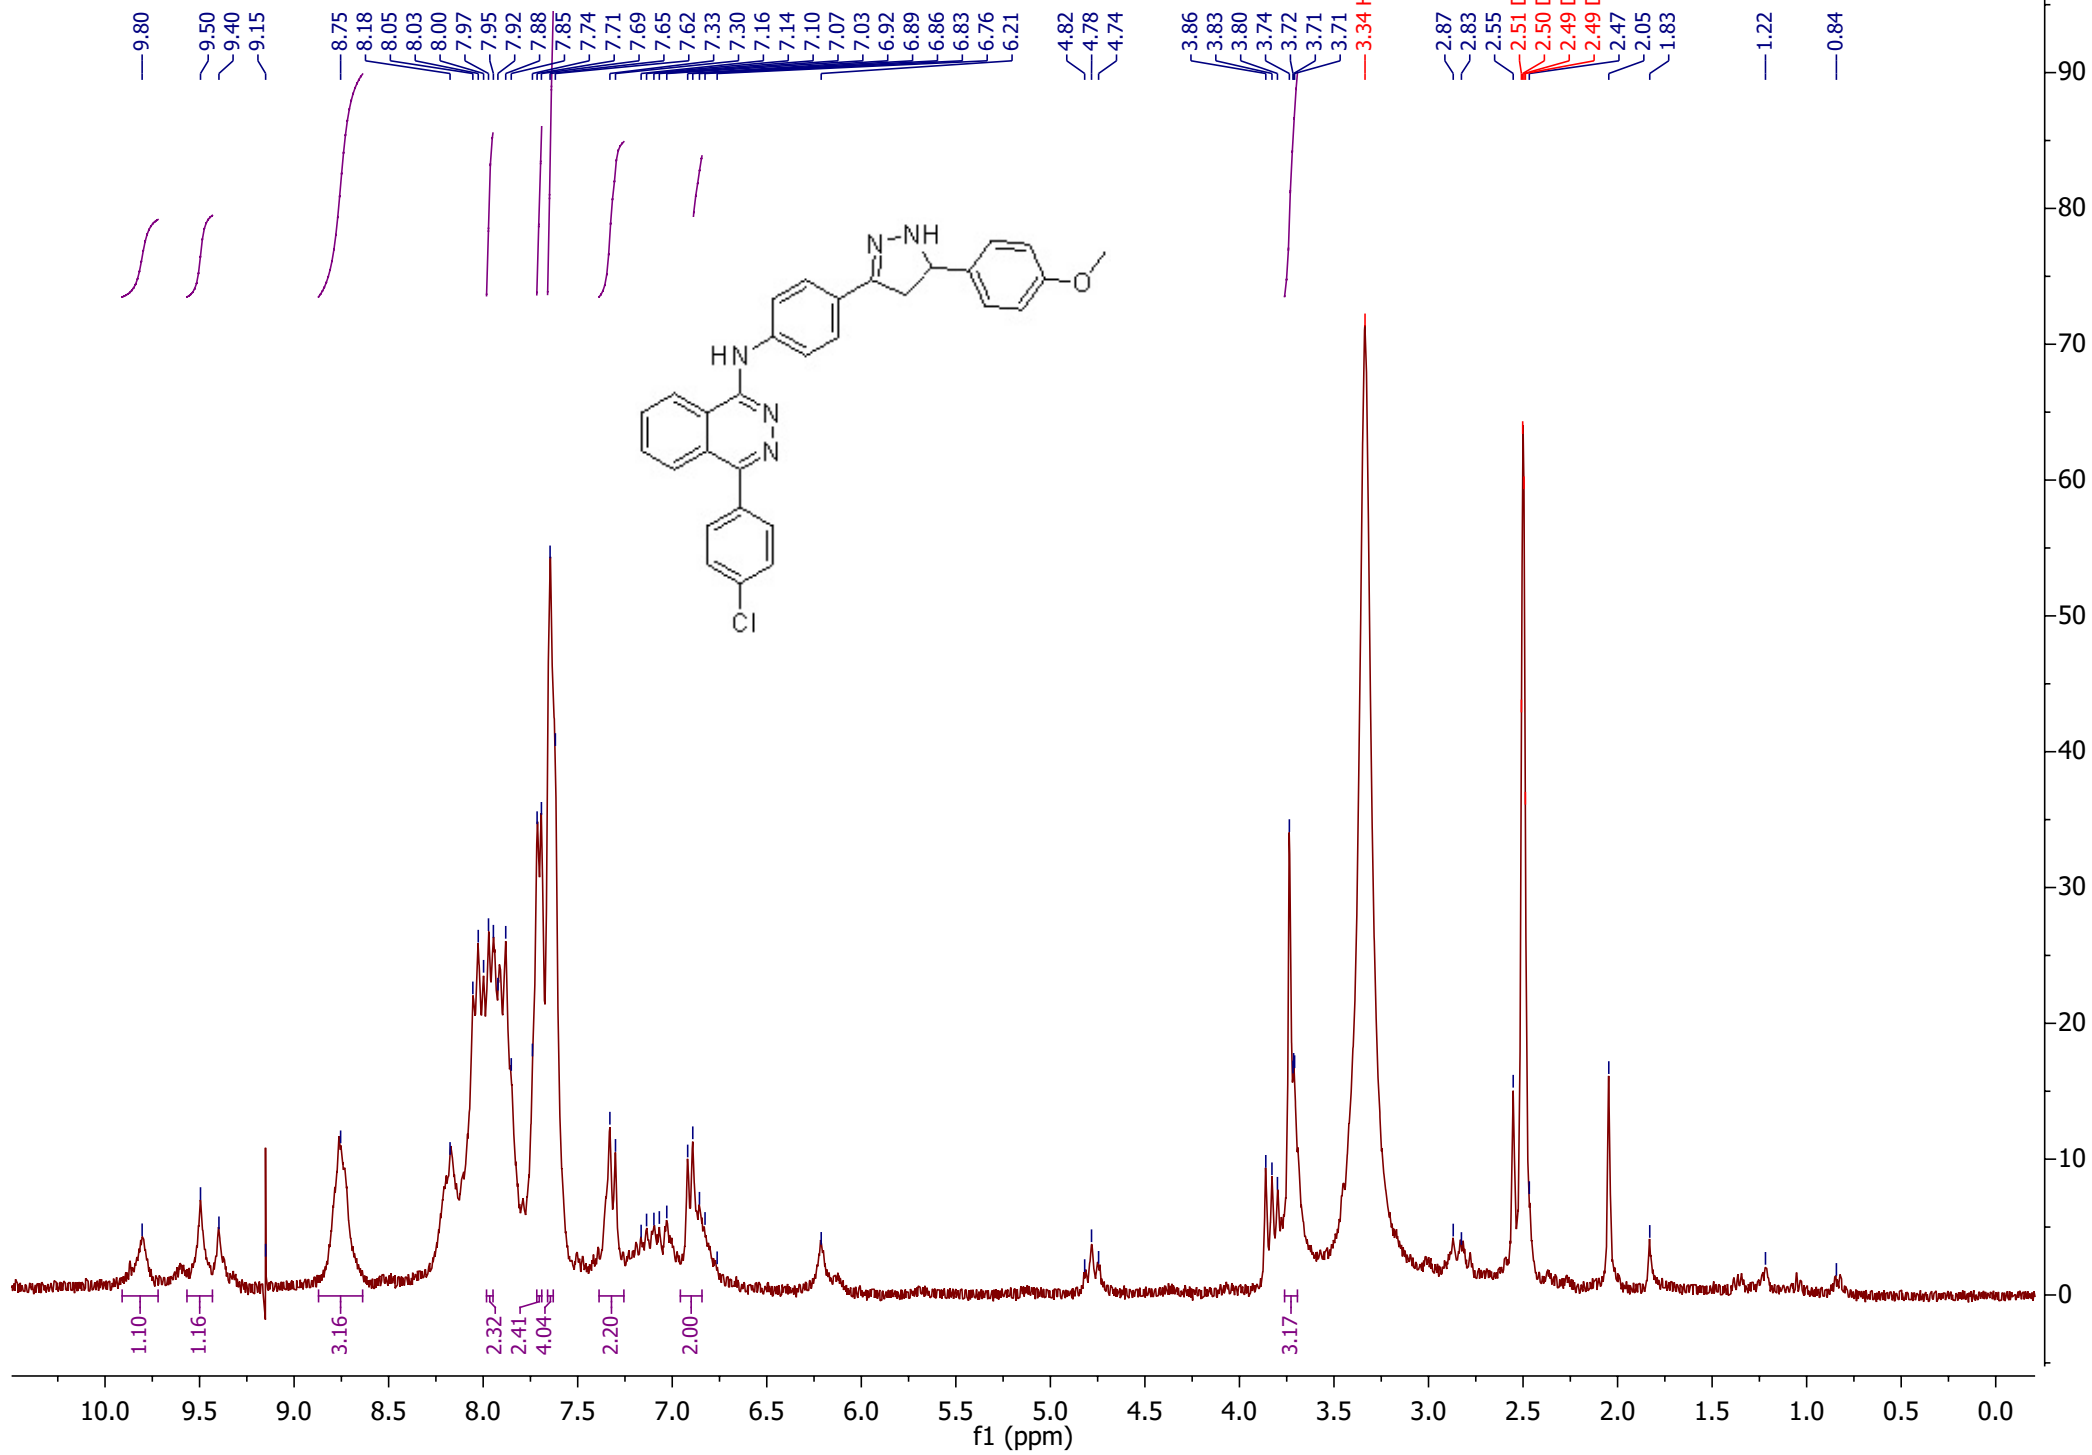

Hatem Hussein - XF-DMSO-H<sub>2</sub>O  
Hatem Hussein - XF-DMSO-H<sub>2</sub>O

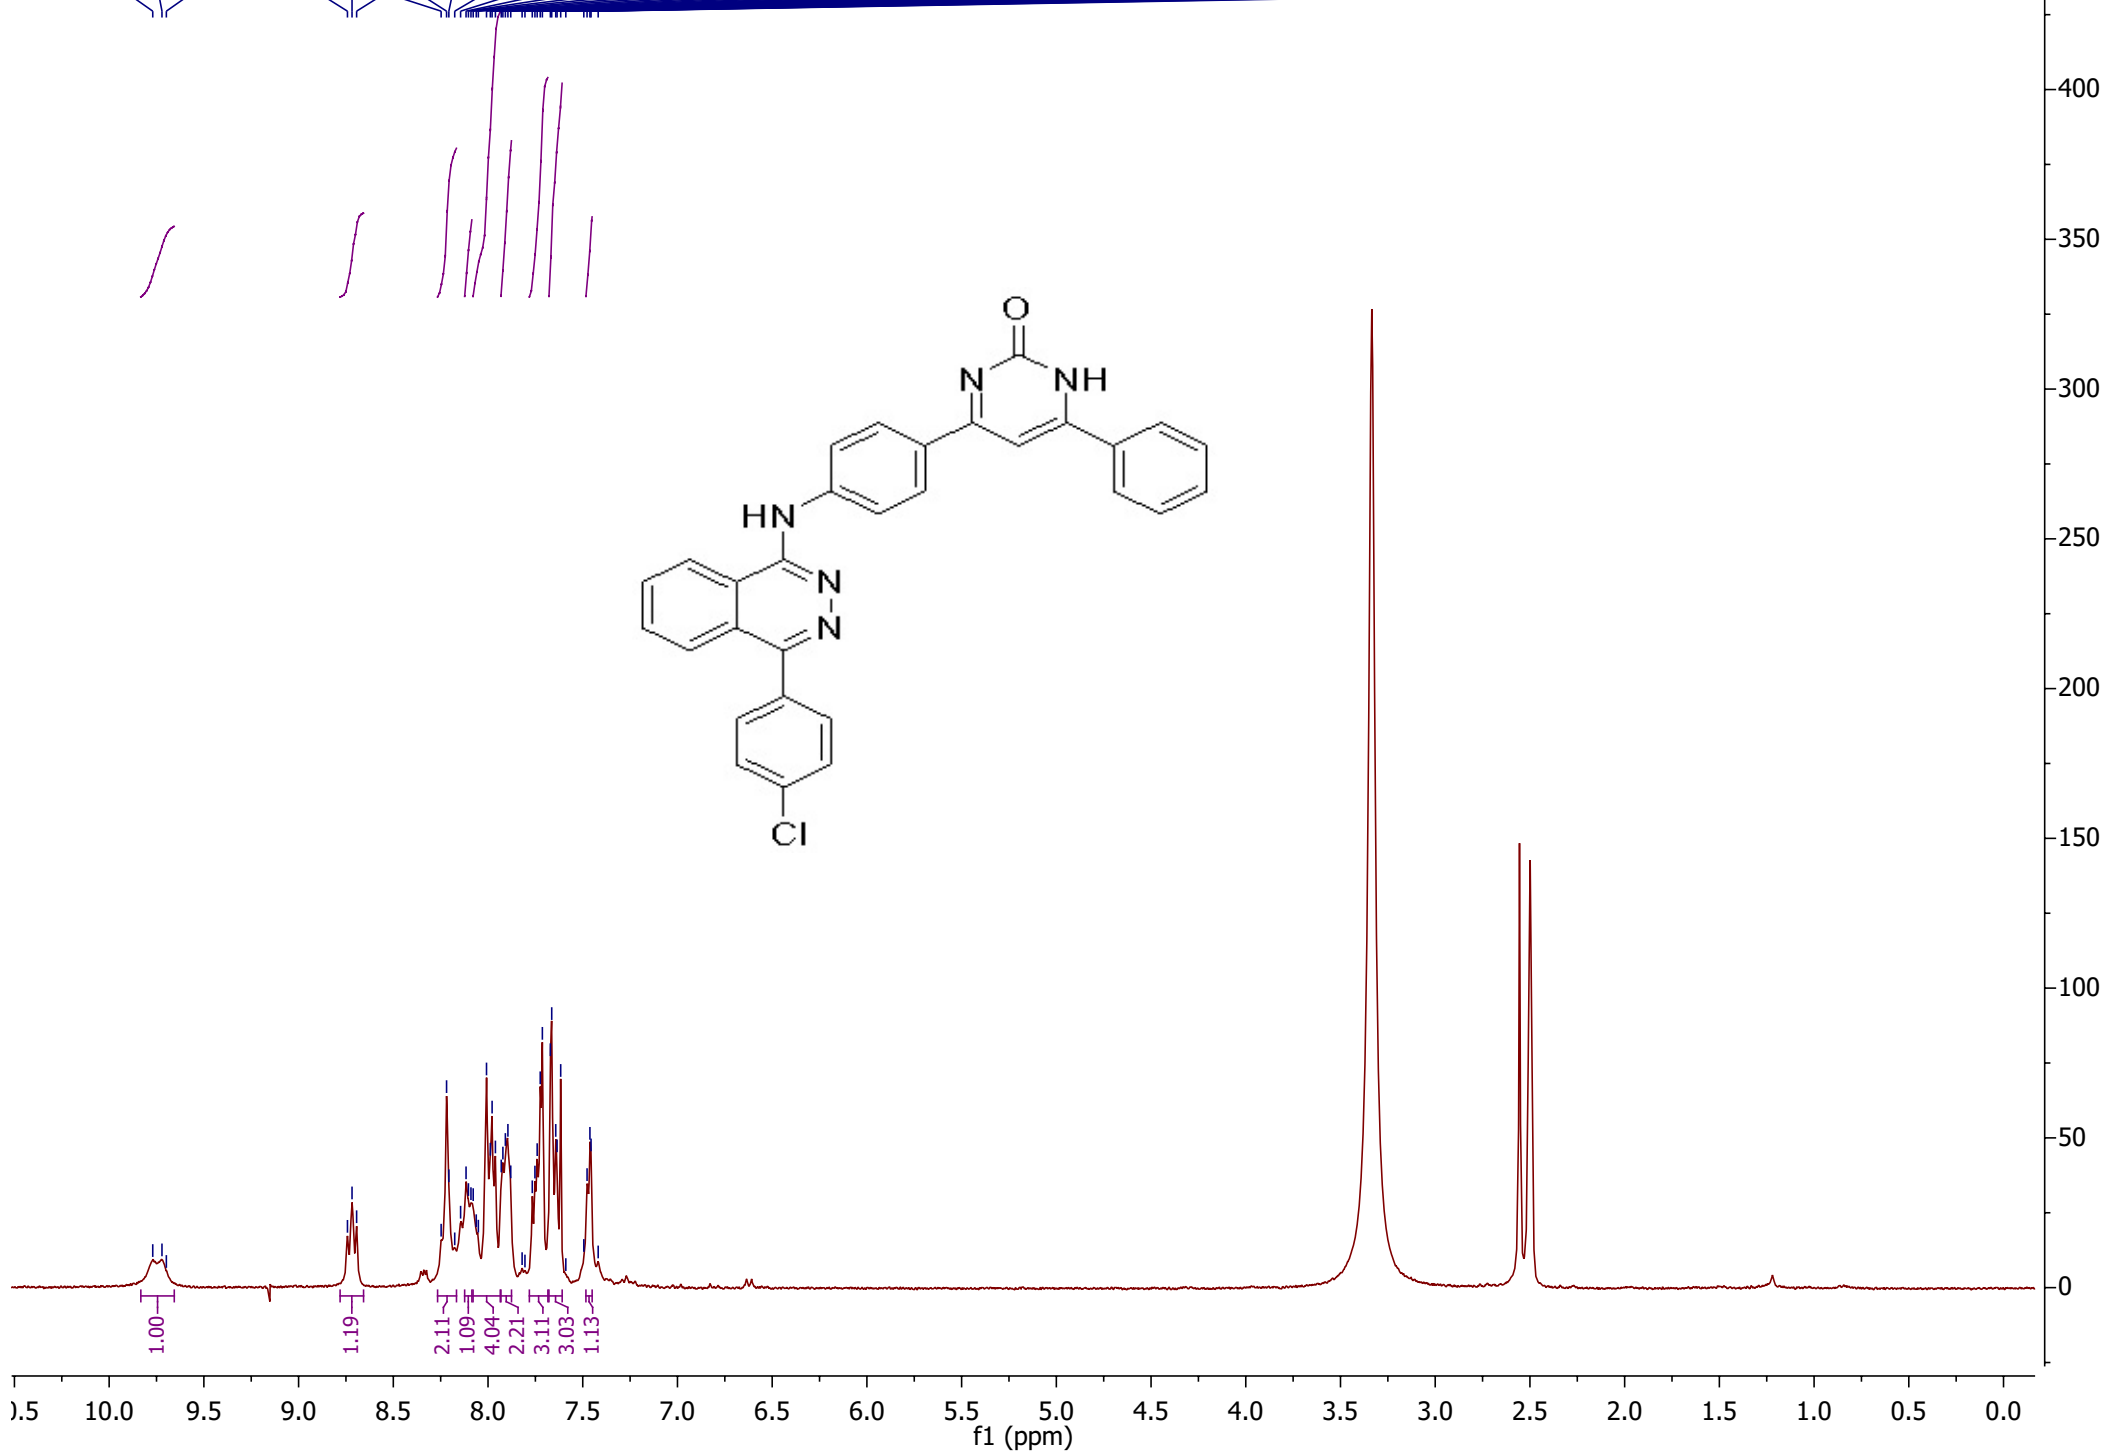

HatemHusein-IXg-DMSO-H1  
HatemHusein-IXg-DMSO-H1

8.79  
8.76  
8.74  
8.25  
8.23  
8.18  
8.15  
8.14  
8.12  
8.09  
8.04  
8.01  
7.99  
7.95  
7.92  
7.89  
7.88  
7.85  
7.76  
7.75  
7.73  
7.72  
7.70  
7.68  
7.65  
7.64  
7.61  
7.54  
7.51  
7.50  
7.47  
7.45

300  
280  
260  
240  
220  
200  
180  
160  
140  
120  
100  
80  
60  
40  
20  
0  
-20

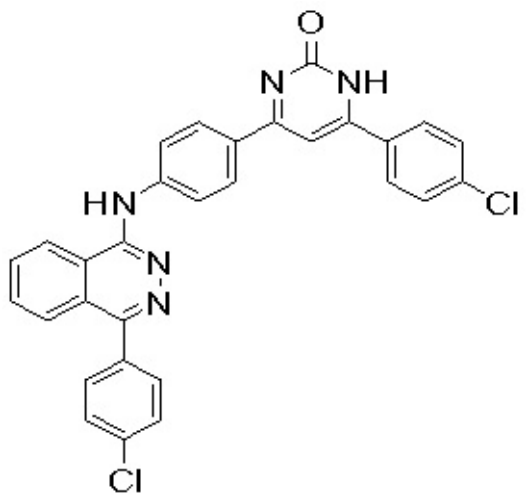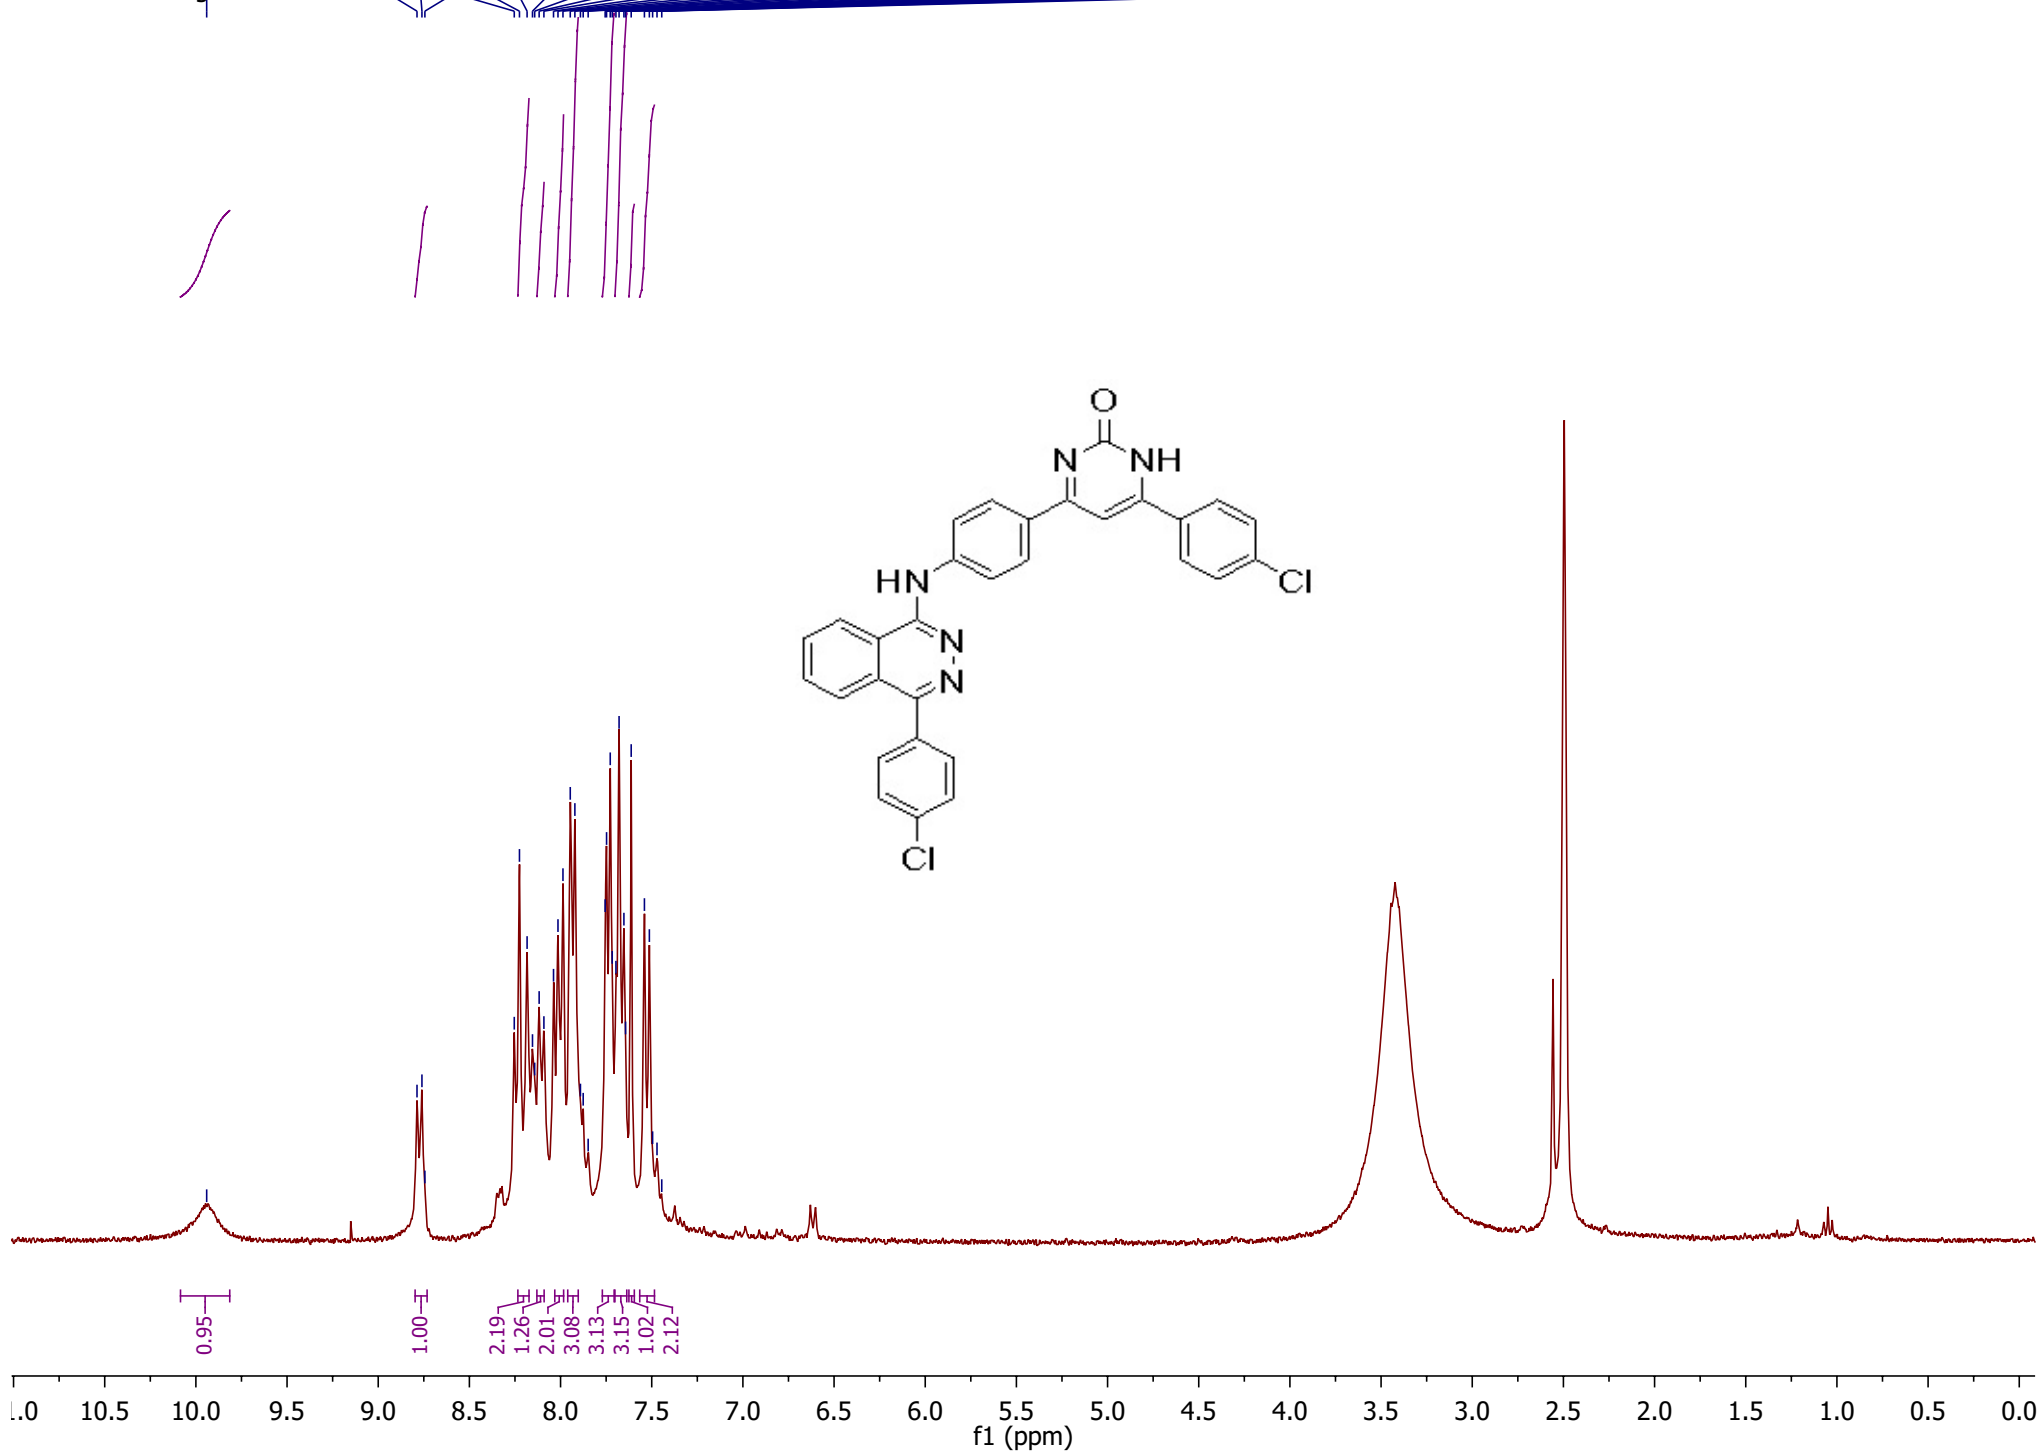

1.0  
10.5  
10.0  
9.5  
9.0  
8.5  
8.0  
7.5  
7.0  
6.5  
6.0  
5.5  
5.0  
4.5  
4.0  
3.5  
3.0  
2.5  
2.0  
1.5  
1.0  
0.5  
0.0

f1 (ppm)

HatemHusein-IX-DMSO-H1  
HatemHusein-IX-DMSO-H1

8.79 8.77 8.17 8.14 8.12 8.12 8.11 8.08 8.06 8.04 8.03 8.02 8.01 8.01 8.00 7.96 7.93 7.76 7.75 7.74 7.73 7.72 7.70 7.70 7.69 7.67 7.67 7.62 7.30

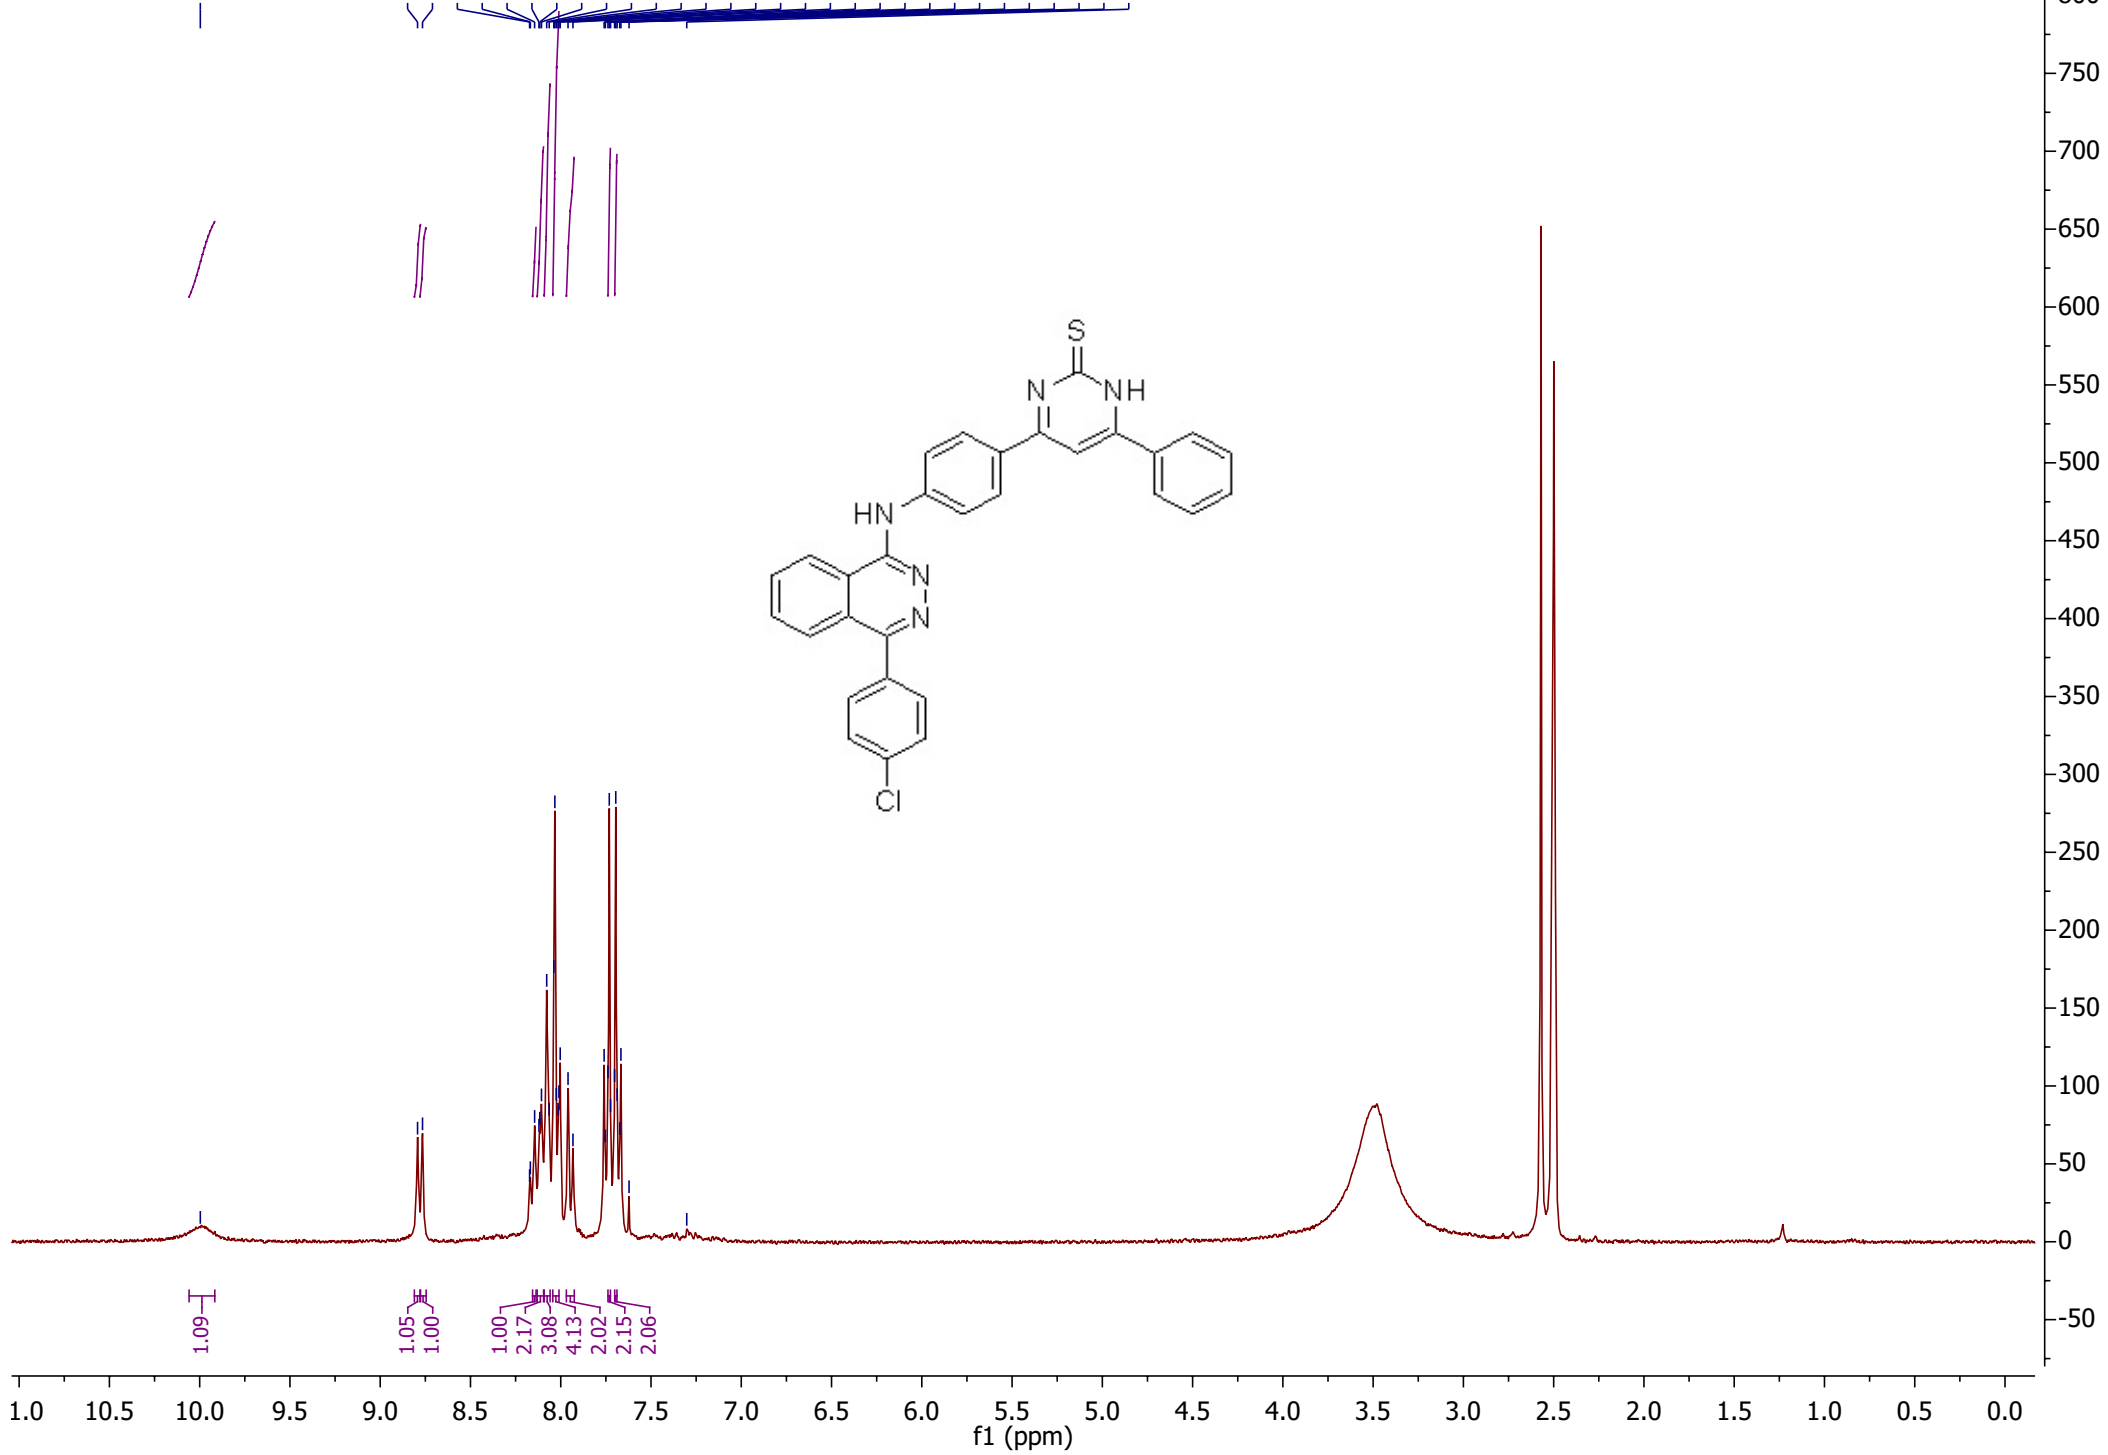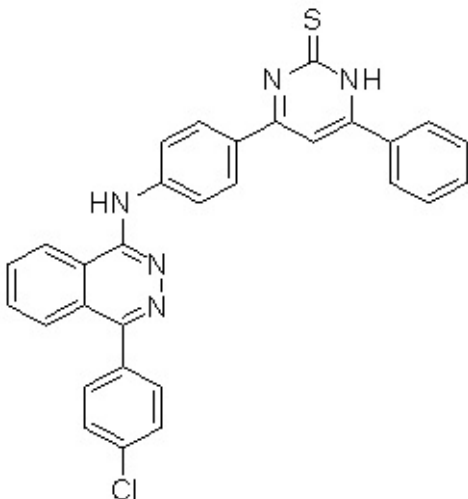



HatemHusein-IXi-DMSO-H1  
HatemHusein-IXi-DMSO-H1

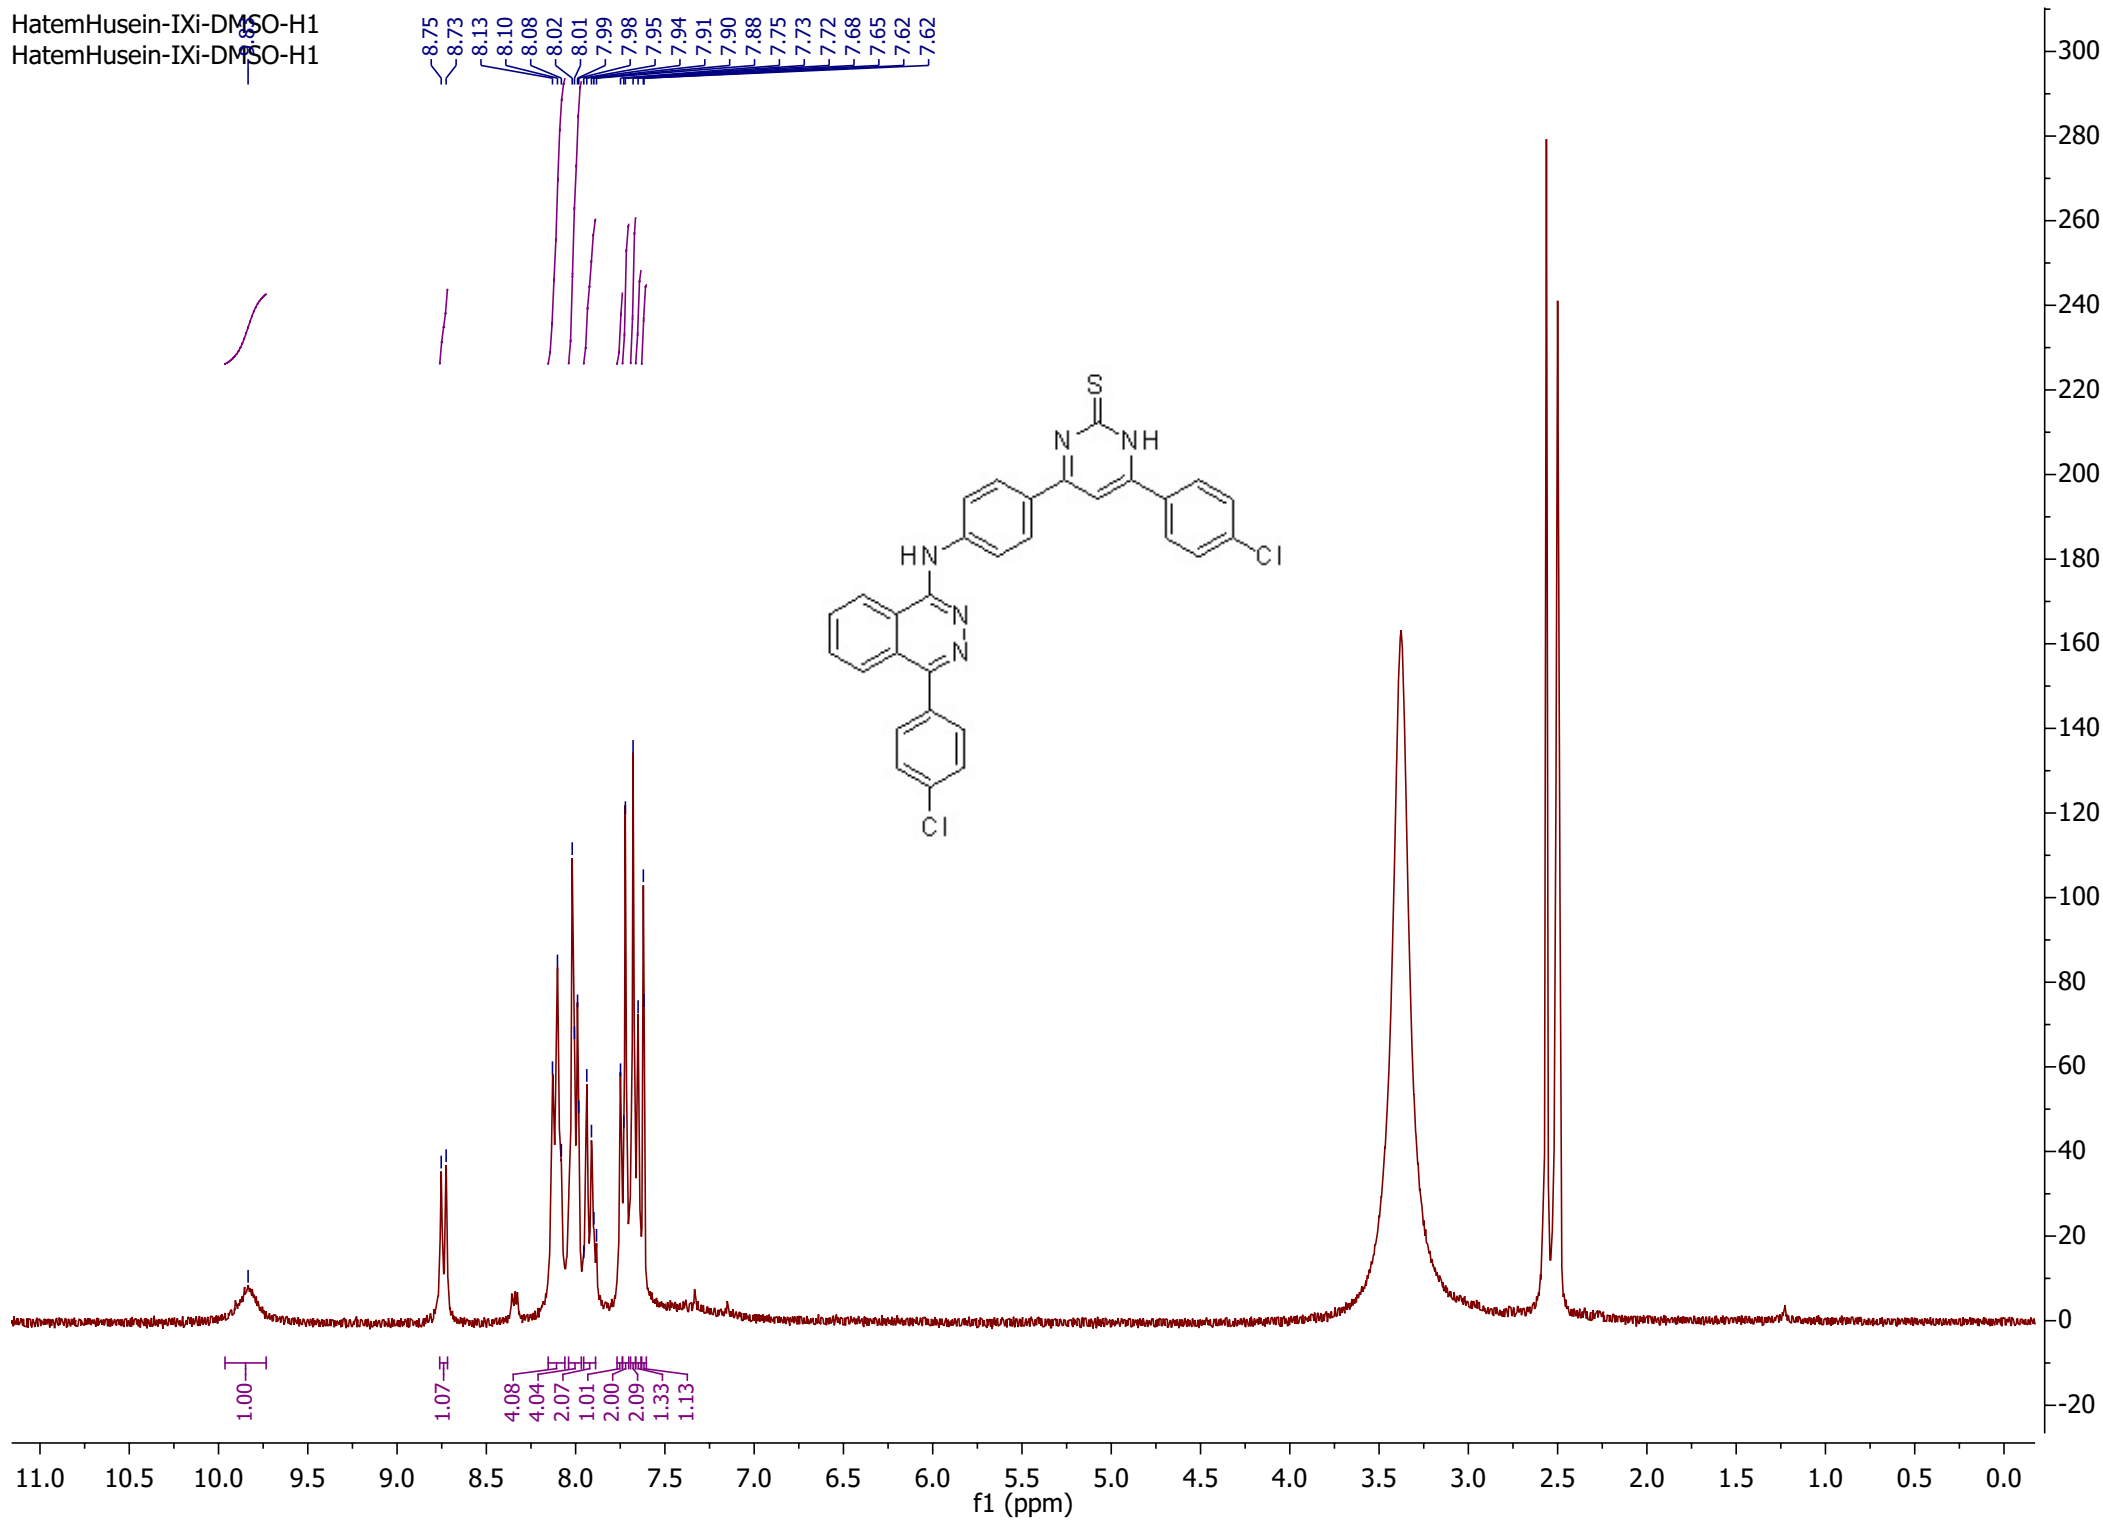

HatemHusein-VIIa-DMSO-H1  
HatemHusein-VIIa-DMSO-H1

8.83  
8.80  
8.77  
8.74  
8.14  
8.11  
8.09  
8.07  
8.05  
8.03  
8.01  
8.00  
7.98  
7.97  
7.93  
7.91  
7.87  
7.75  
7.74  
7.72  
7.71  
7.68  
7.67  
7.65

2.56

380  
360  
340  
320  
300  
280  
260  
240  
220  
200  
180  
160  
140  
120  
100  
80  
60  
40  
20  
0  
-20

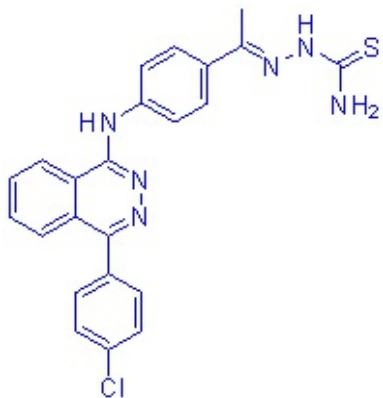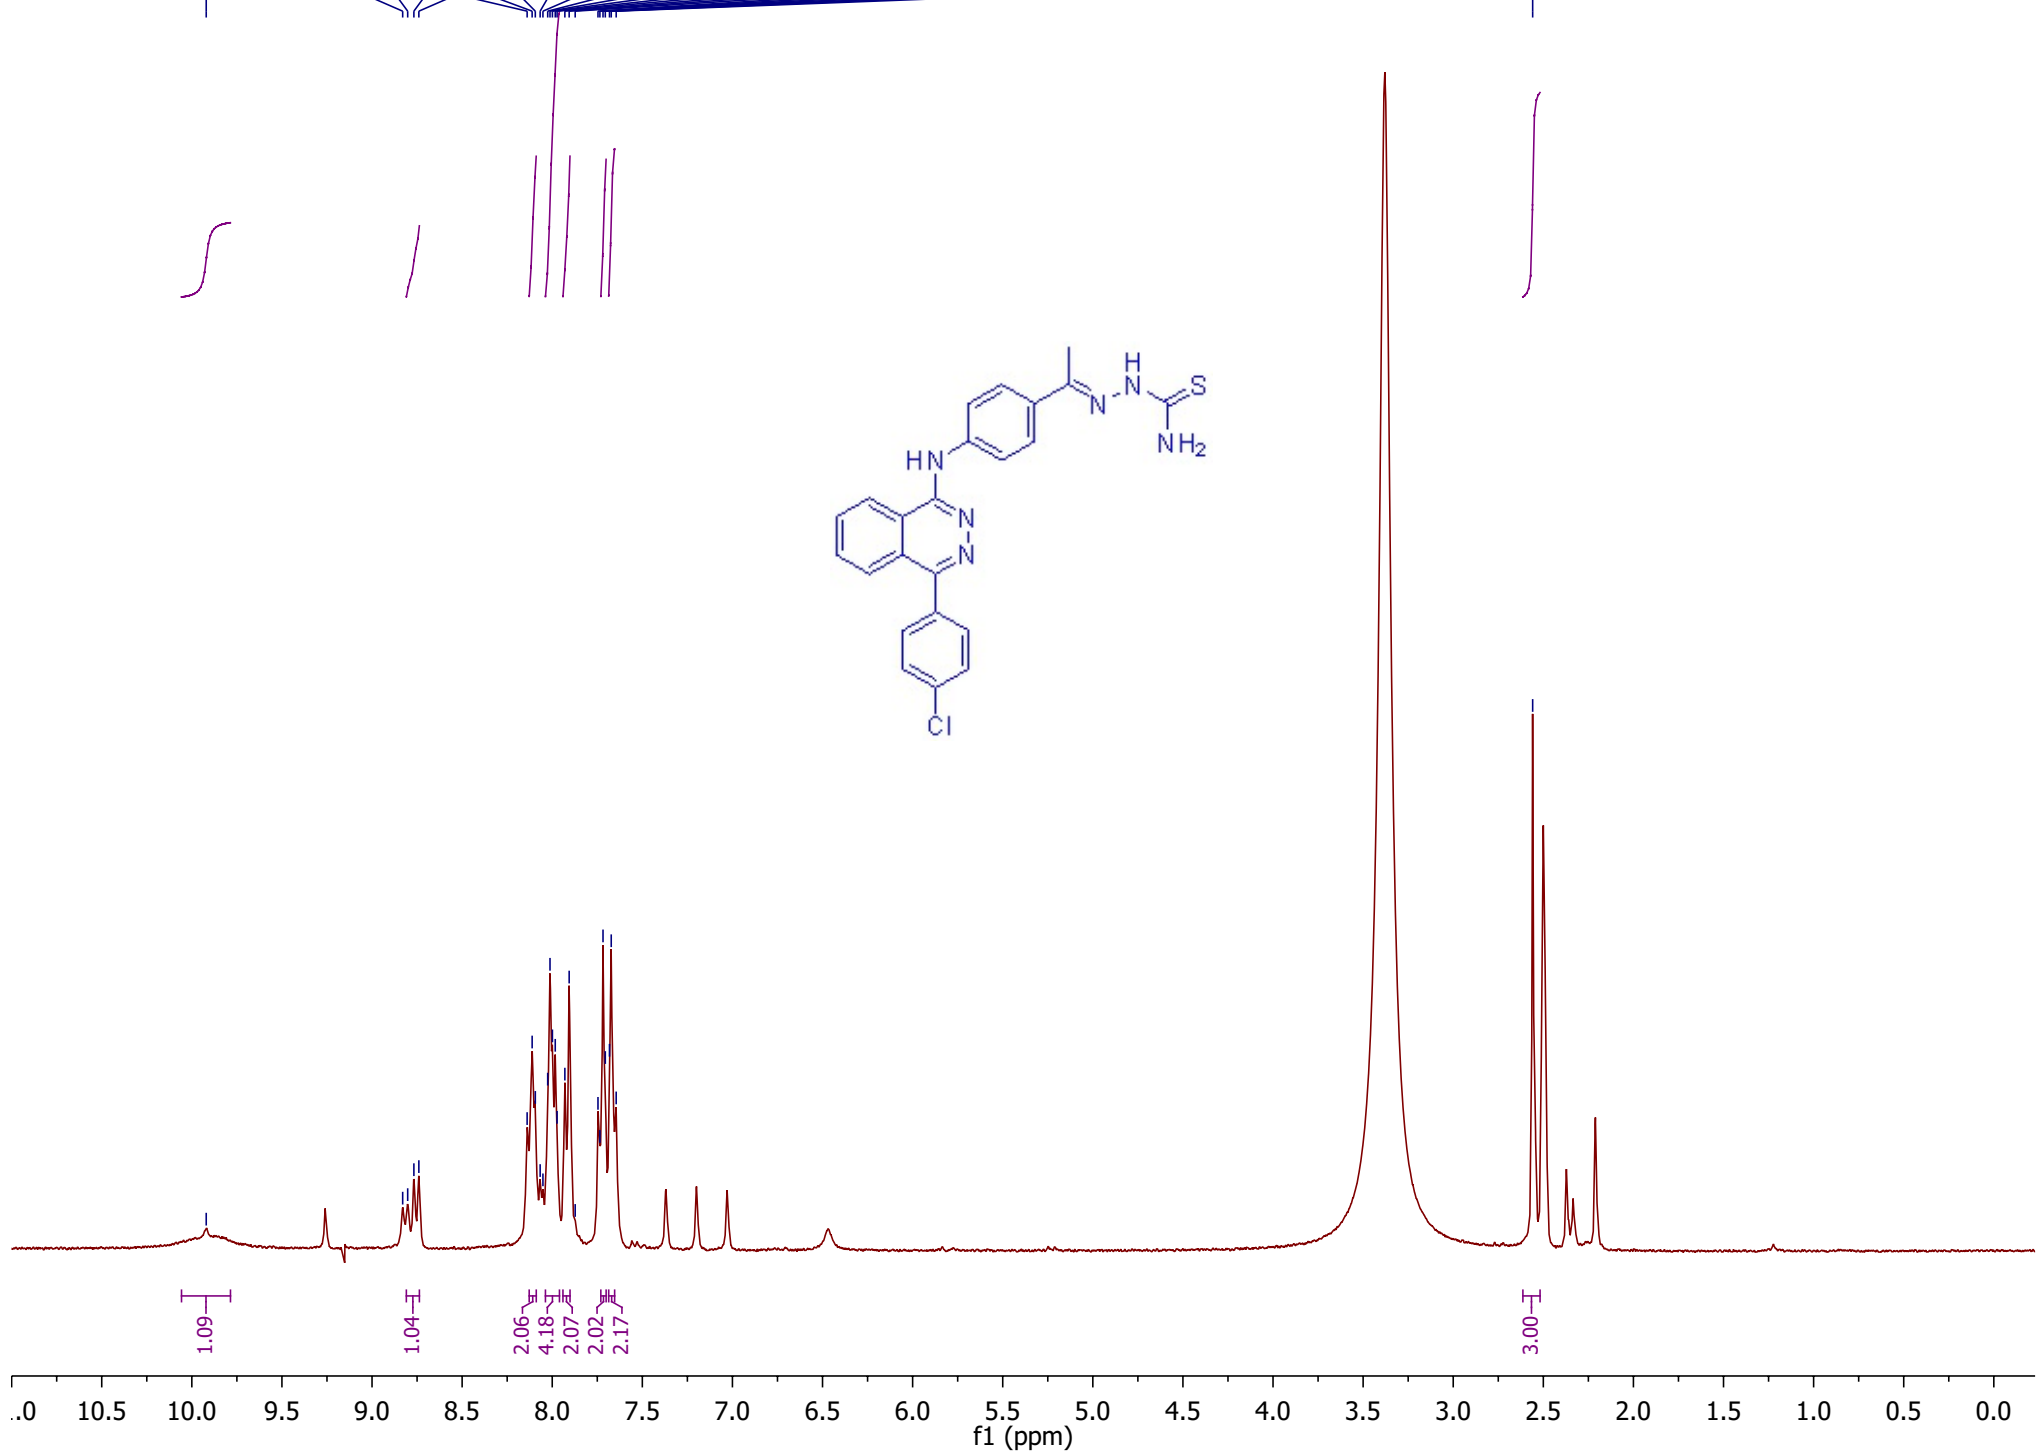

.0 10.5 10.0 9.5 9.0 8.5 8.0 7.5 7.0 6.5 6.0 5.5 5.0 4.5 4.0 3.5 3.0 2.5 2.0 1.5 1.0 0.5 0.0  
f1 (ppm)

HatemHusein-VIIC-DMSO-H1  
HatemHusein-VIIC-DMSO-H1

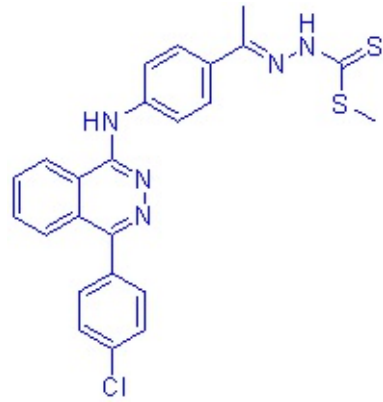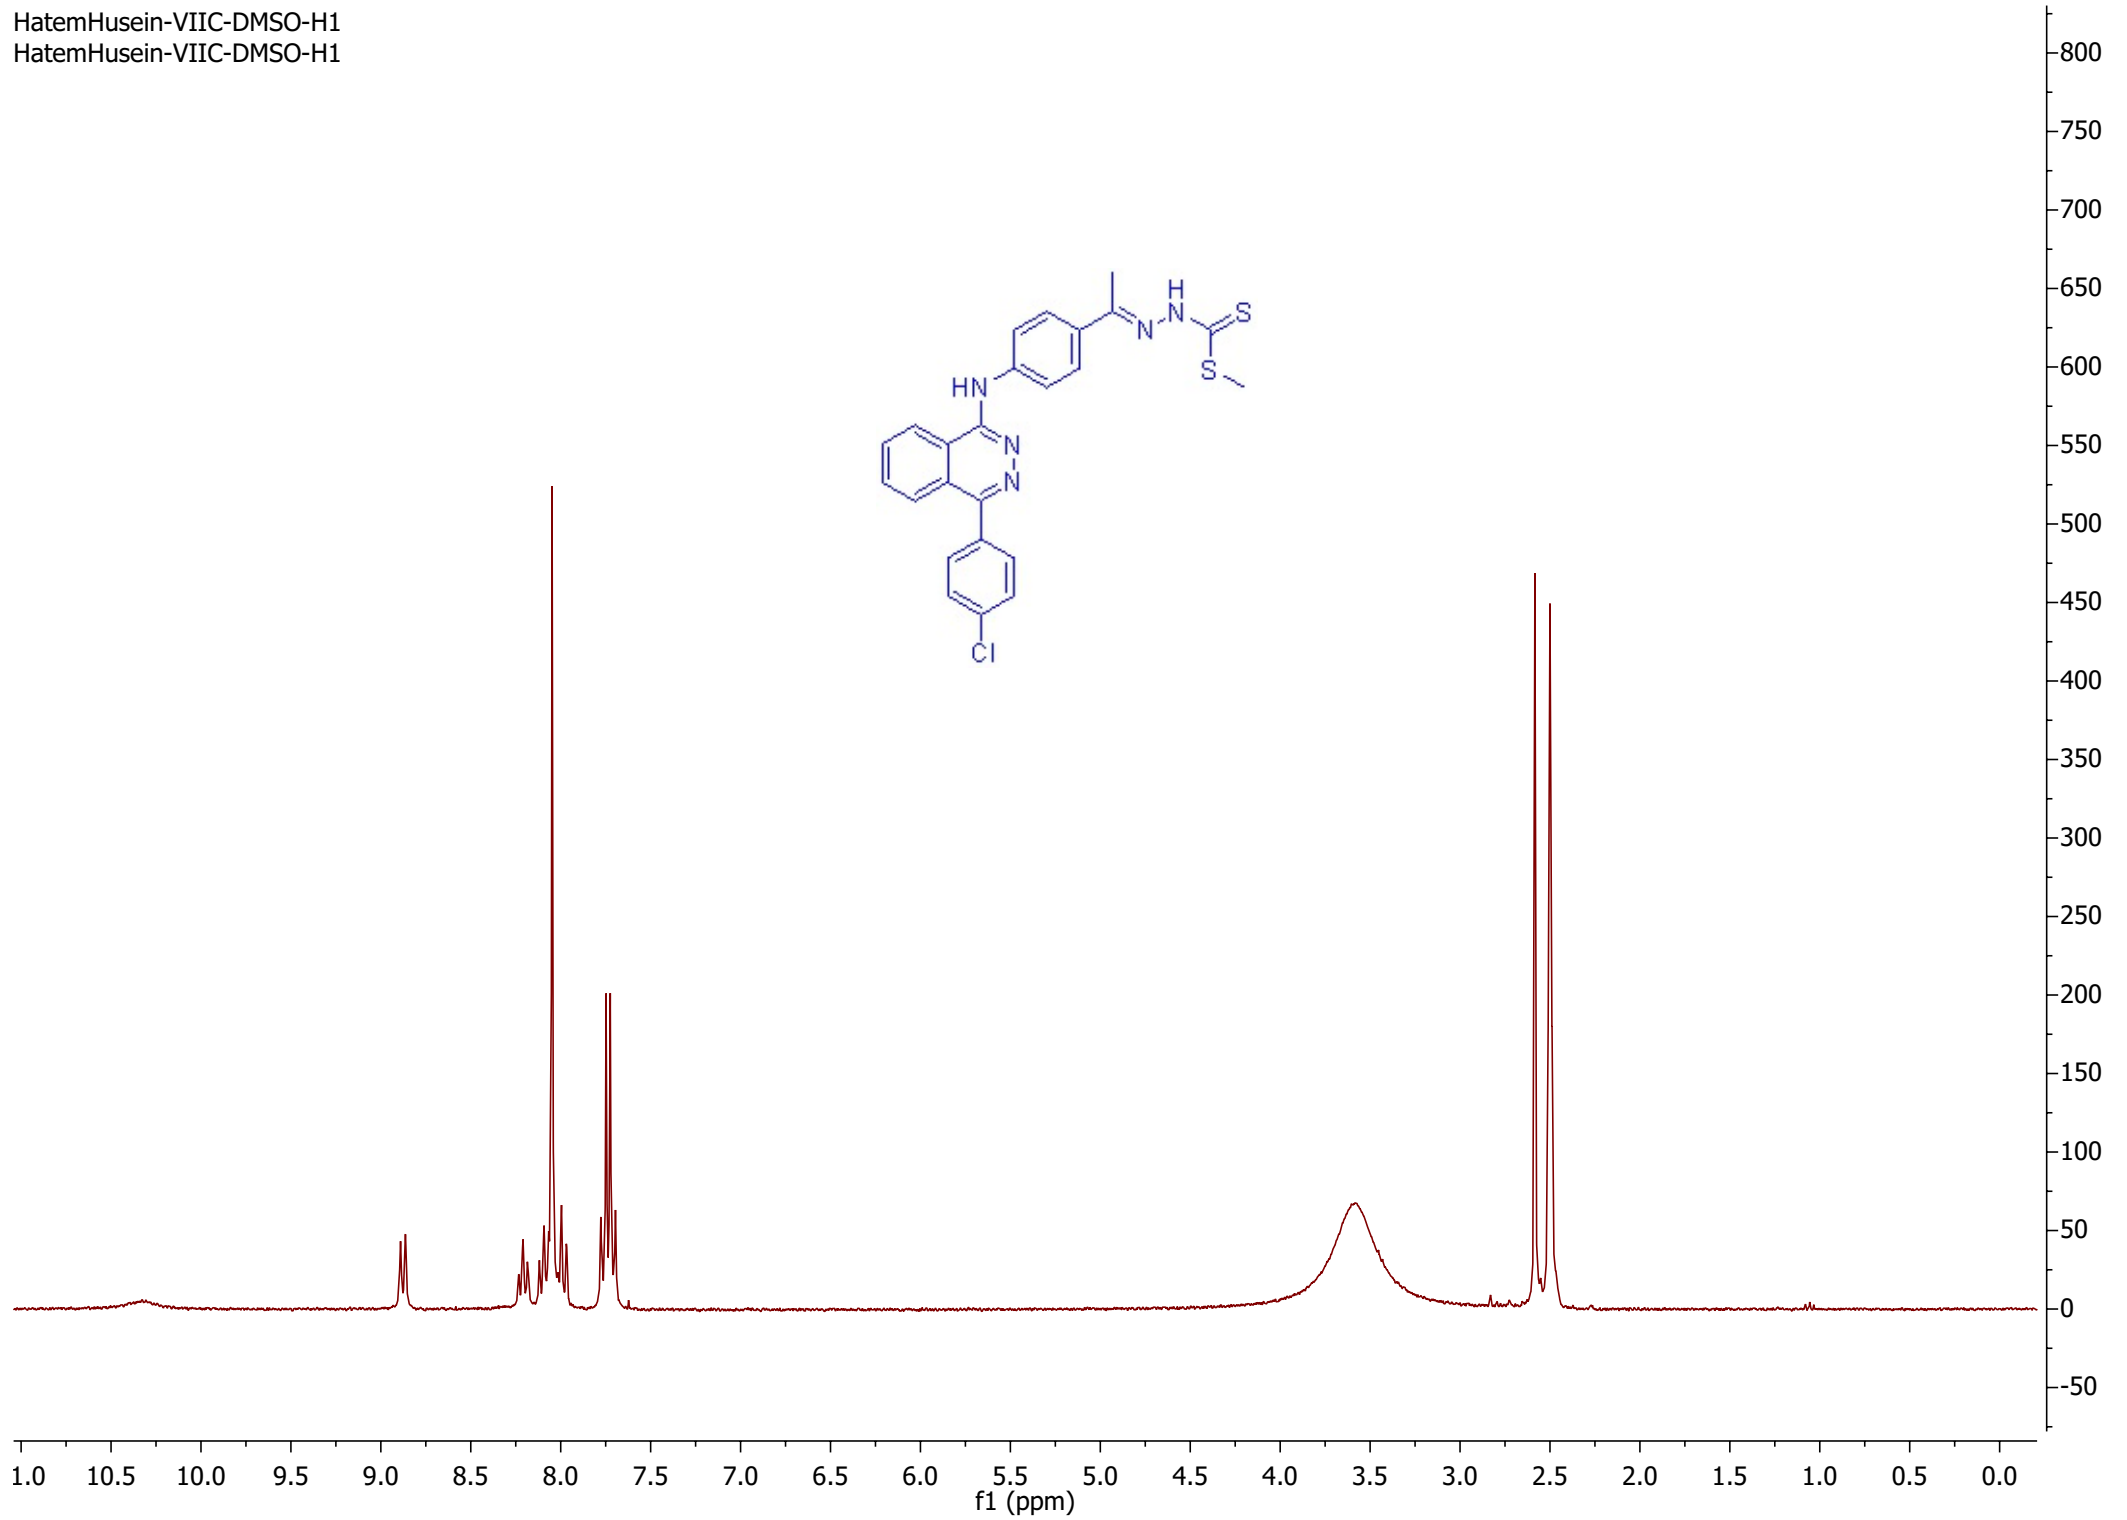

HatemHusein-VIIIa-DMSO-H  
HatemHusein-VIIIa-DMSO-H

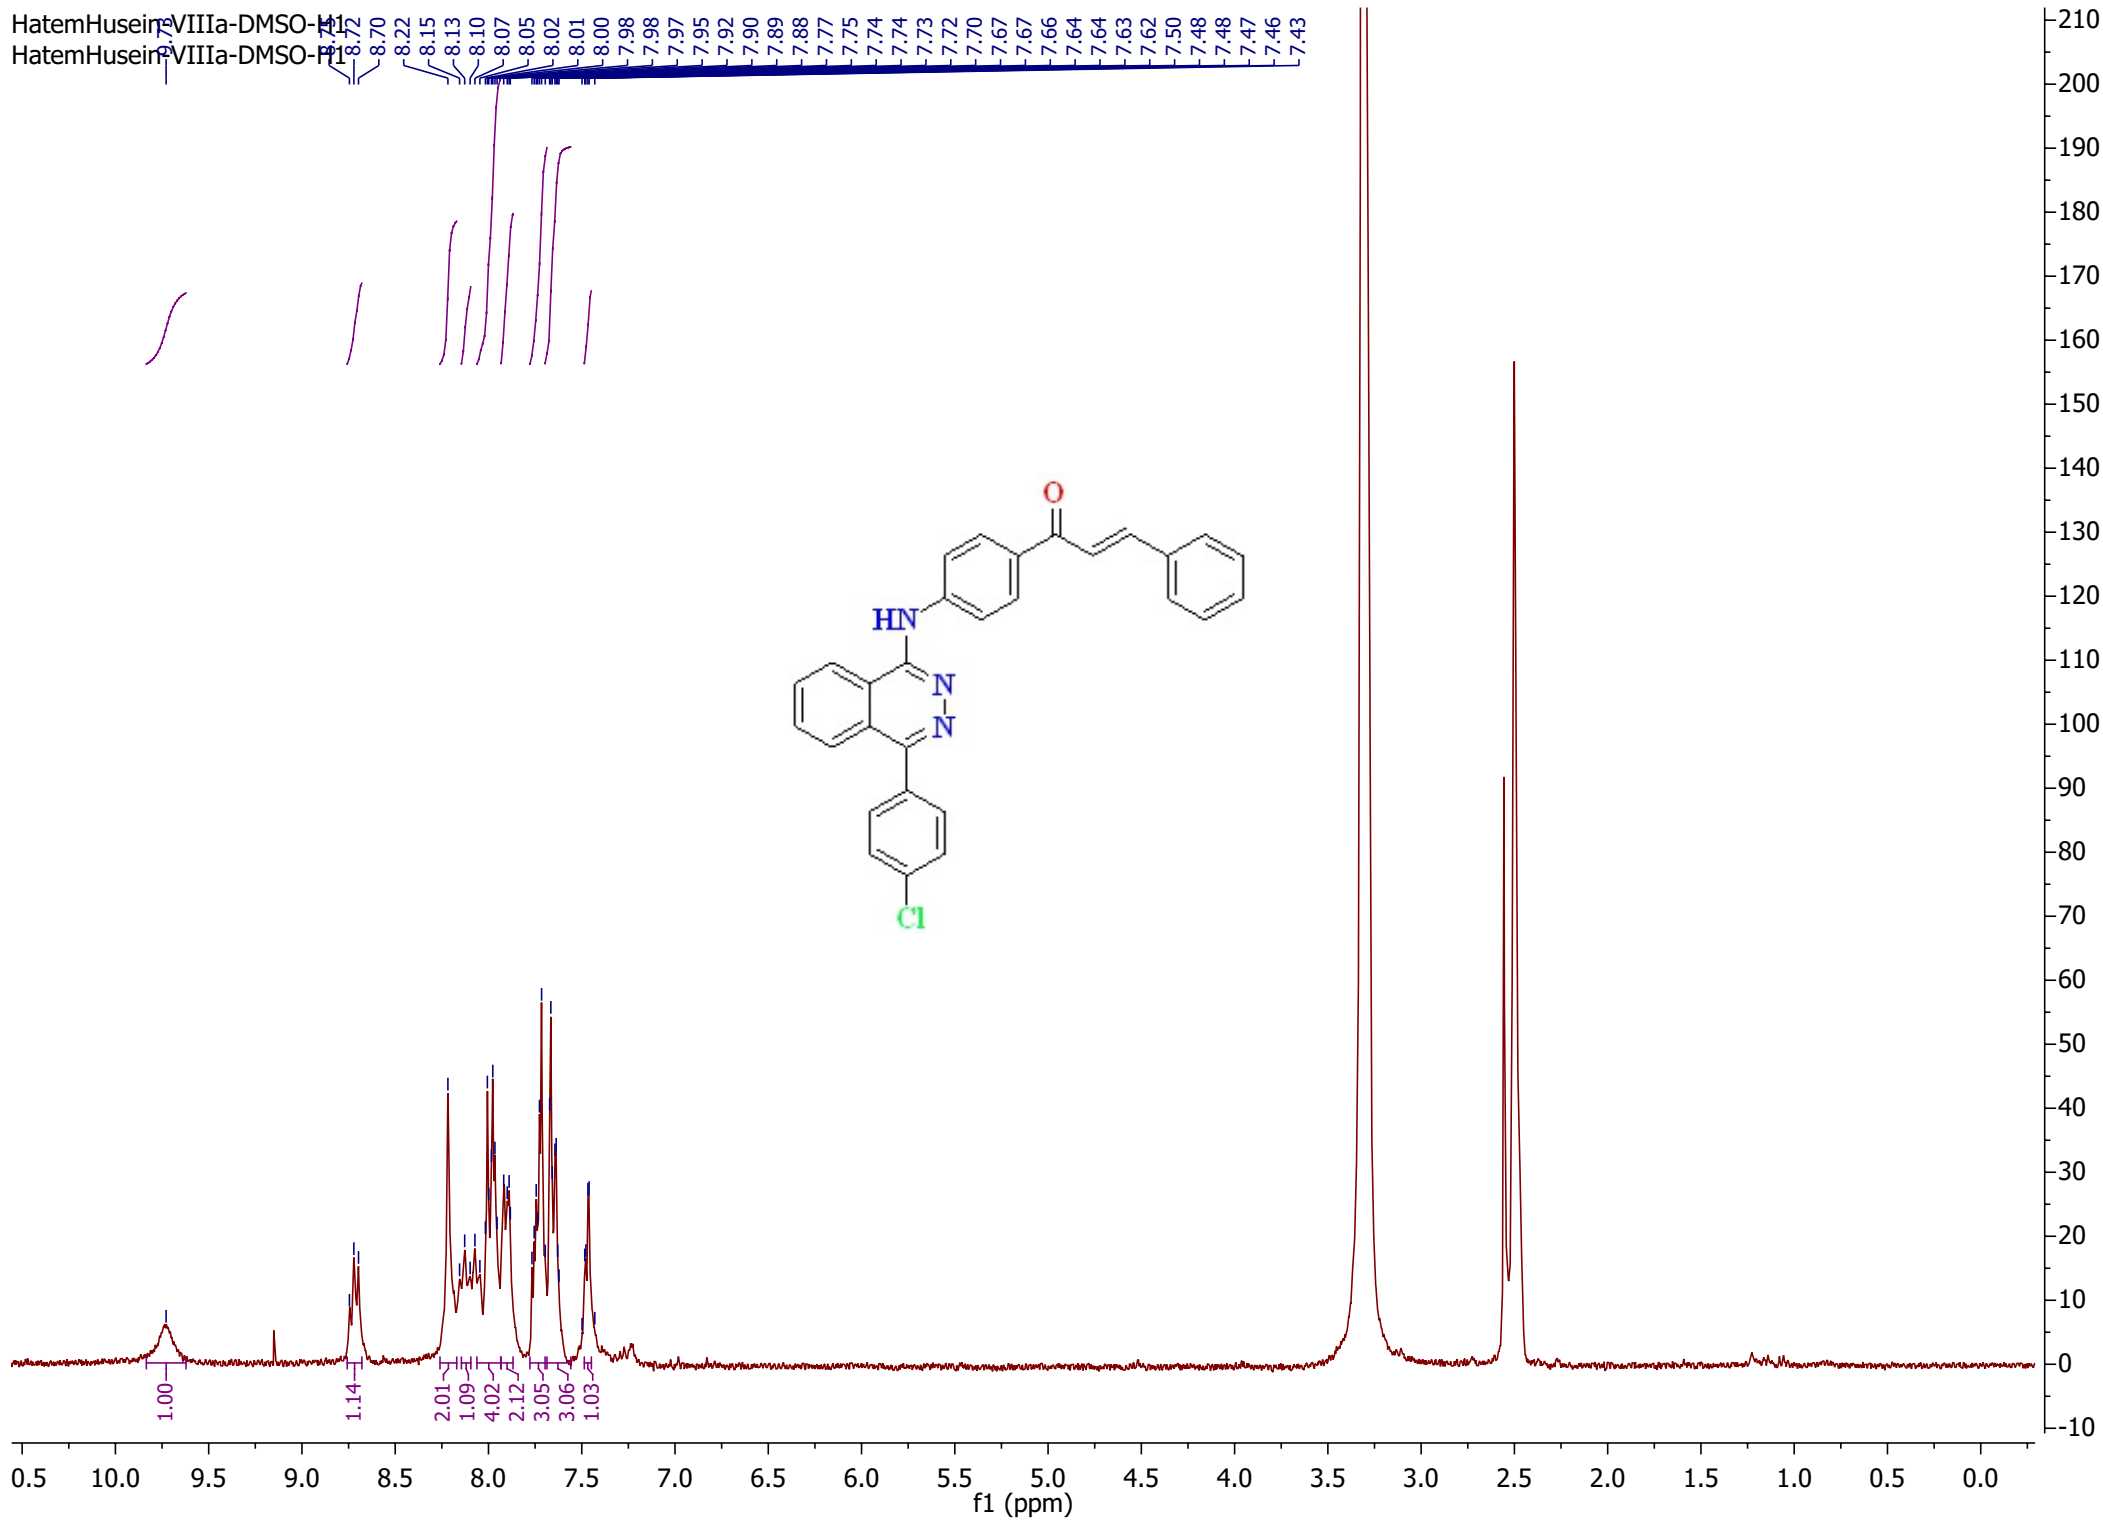

HatemHusein-X1Xd-DMSO-H1  
HatemHusein-X1Xd-DMSO-H1

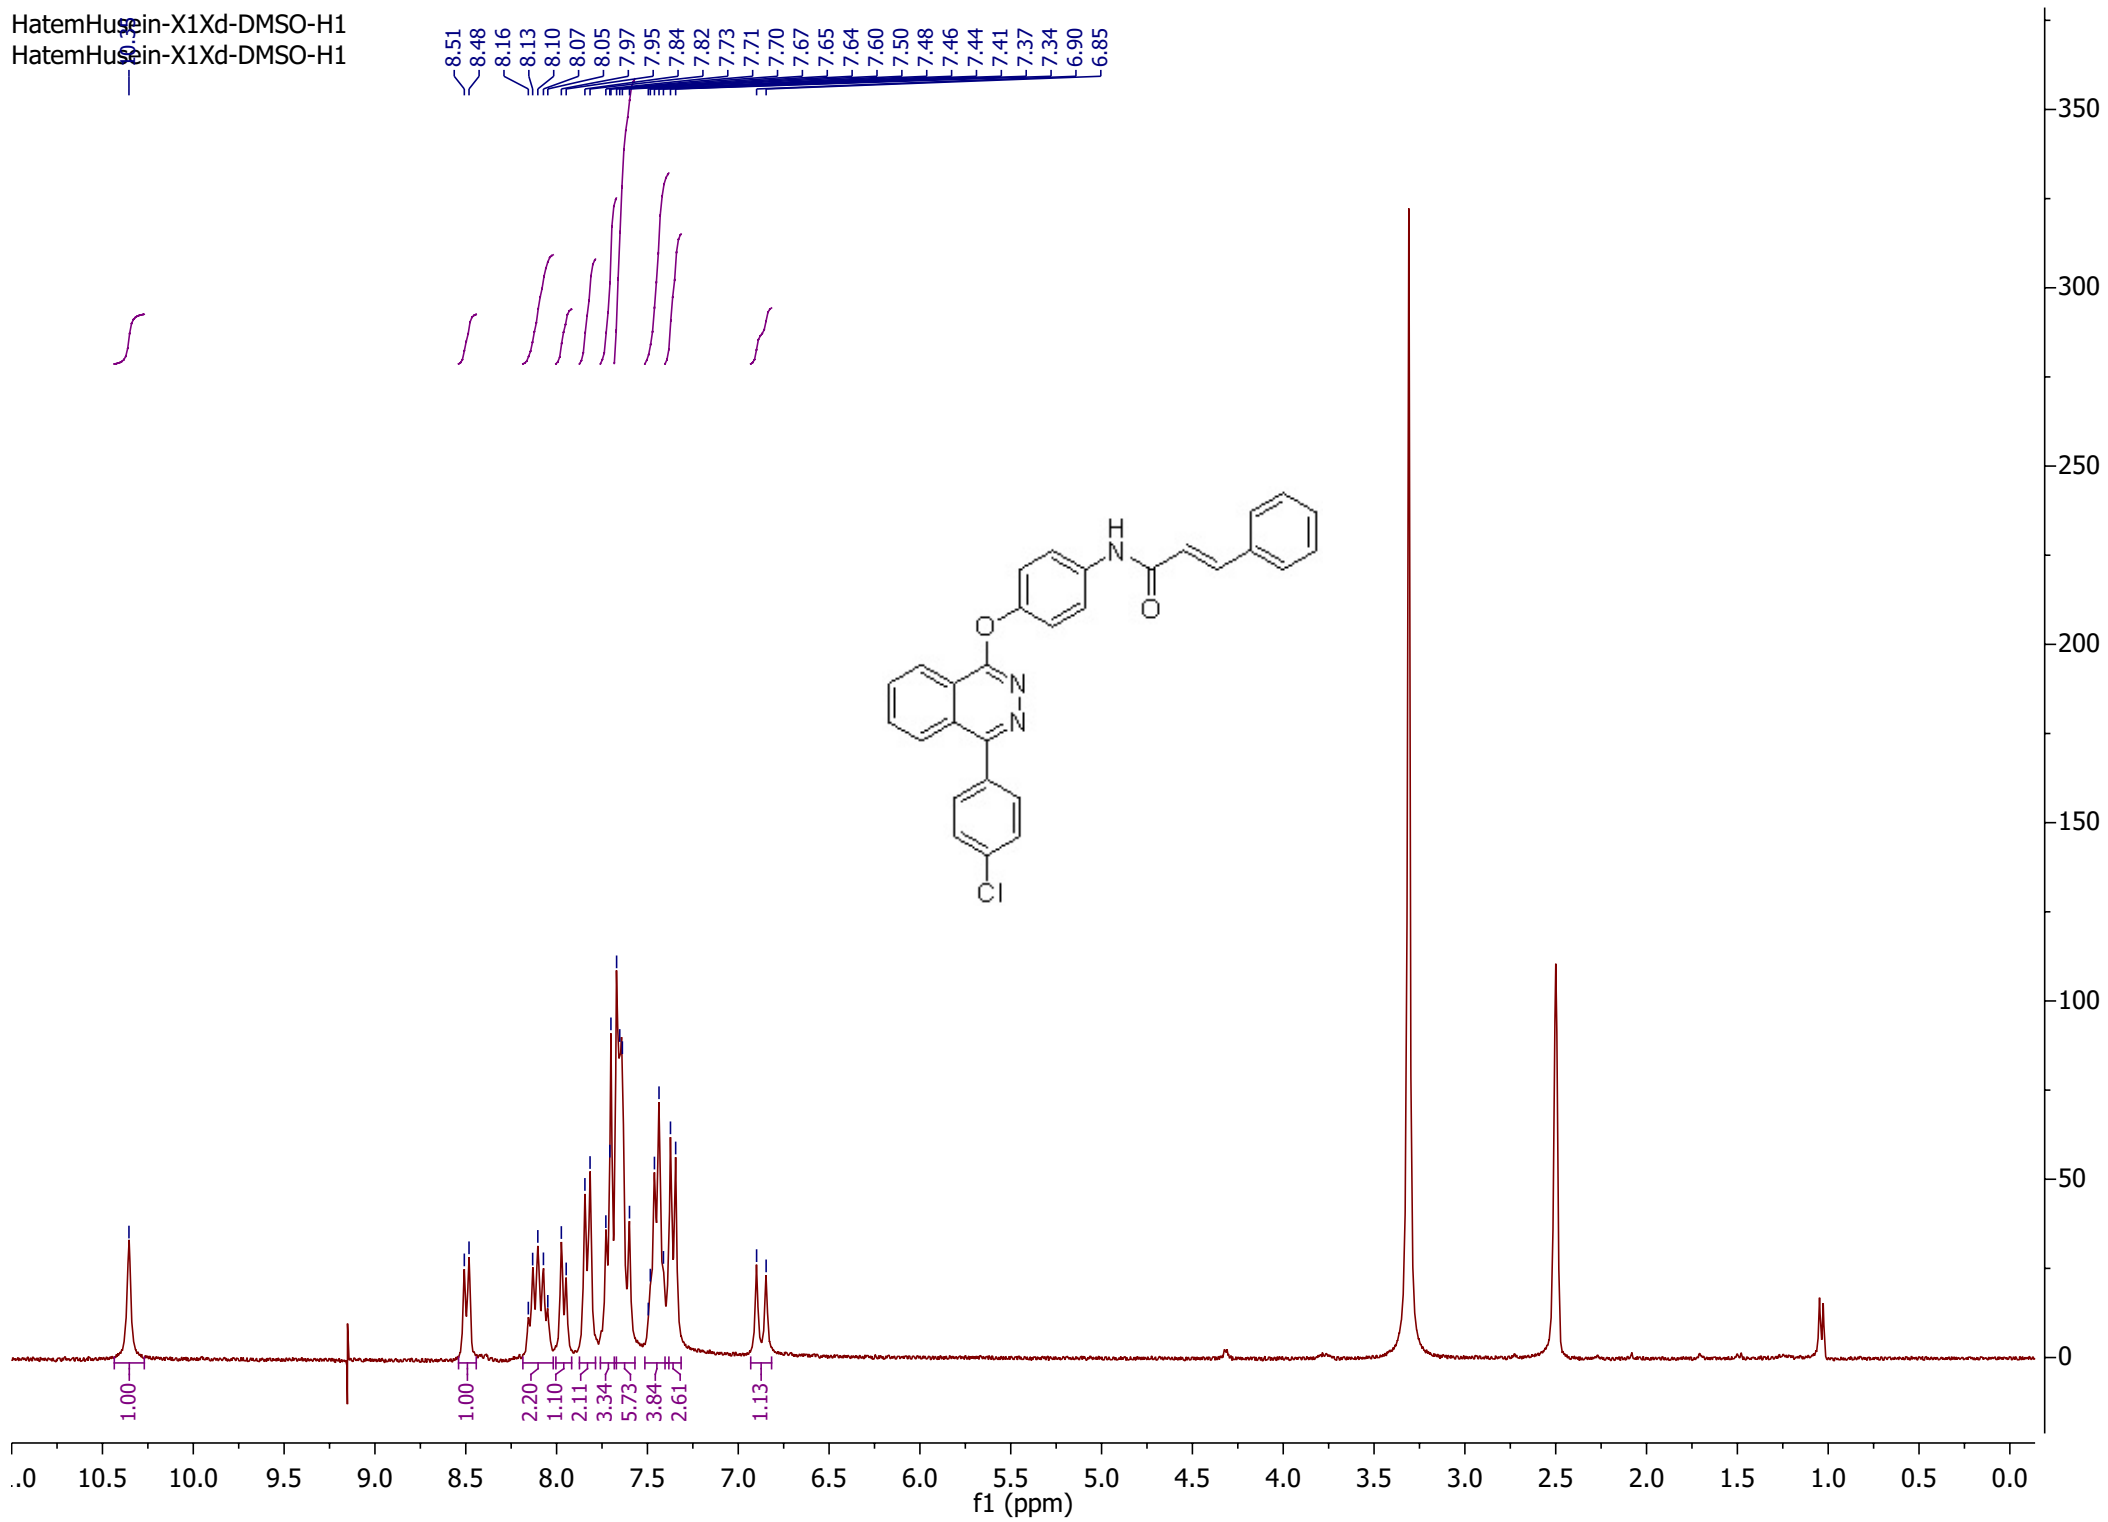

HatemHusein-XIIa-DMSO-H1  
HatemHusein-XIIa-DMSO-H1

9.15  
8.81  
8.79  
8.49  
8.45  
8.03  
7.76  
7.62  
7.60  
7.43  
7.41

3.21 H<sub>2</sub>O

2.50 DMSO

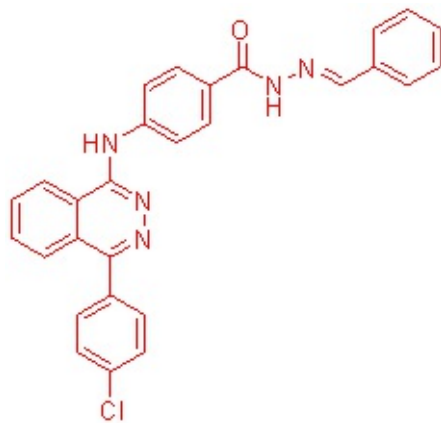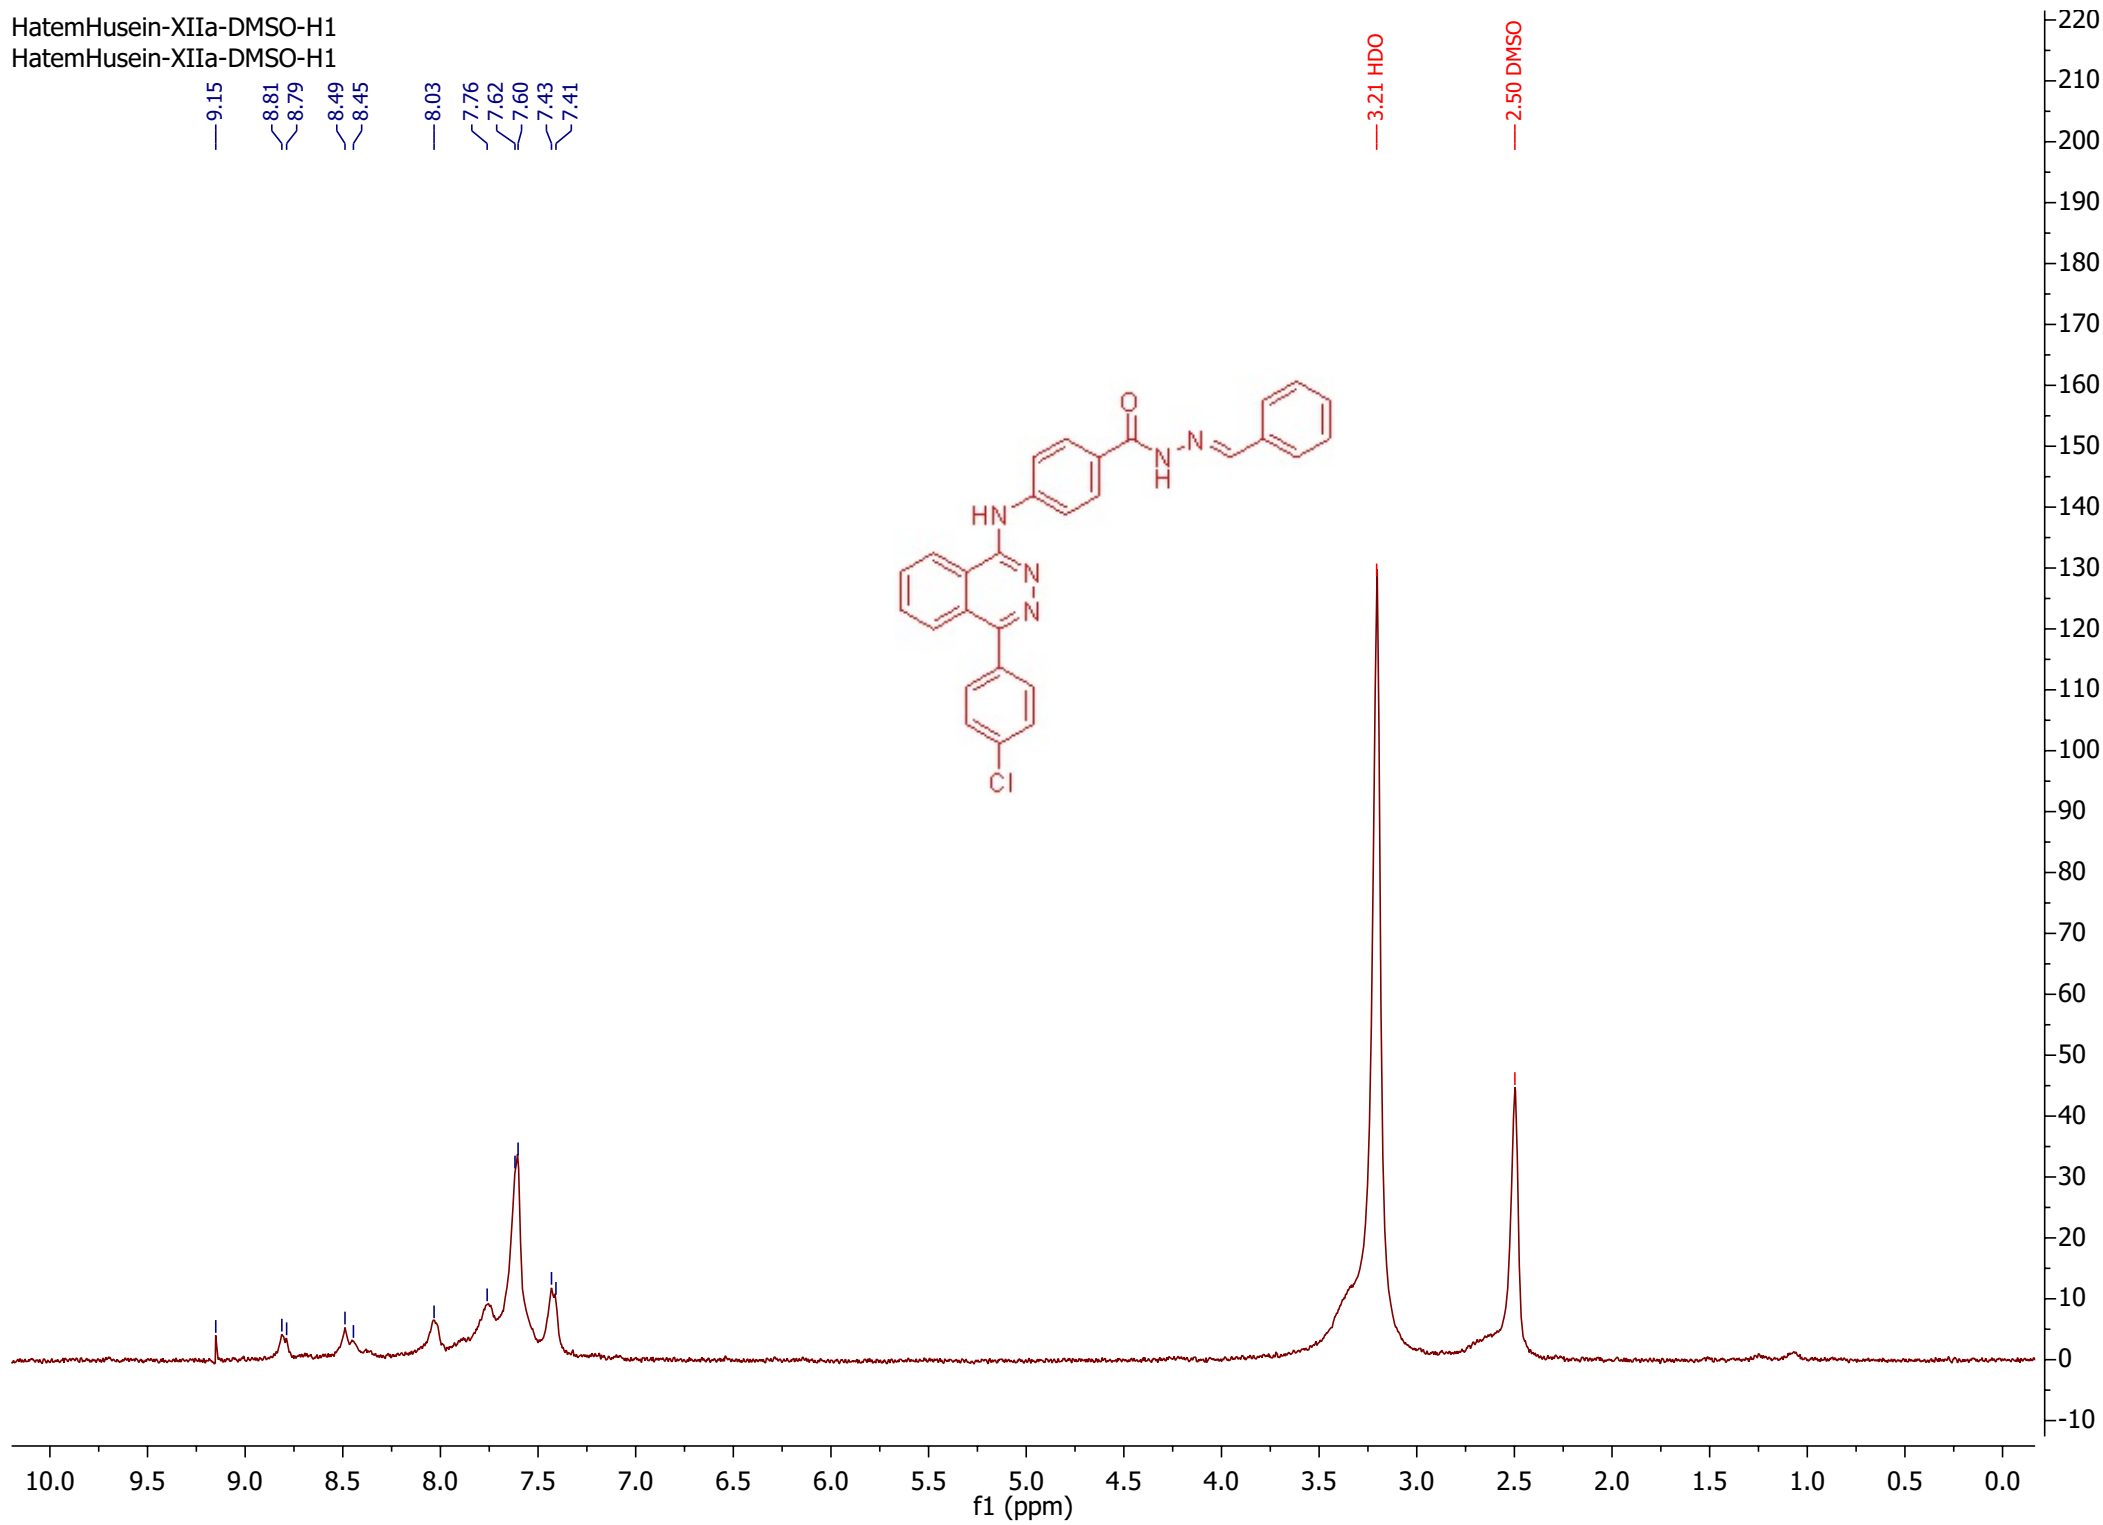

Hatem Hussein-XIib-DMSO-H1  
Hatem Hussein-XIib-DMSO-H1

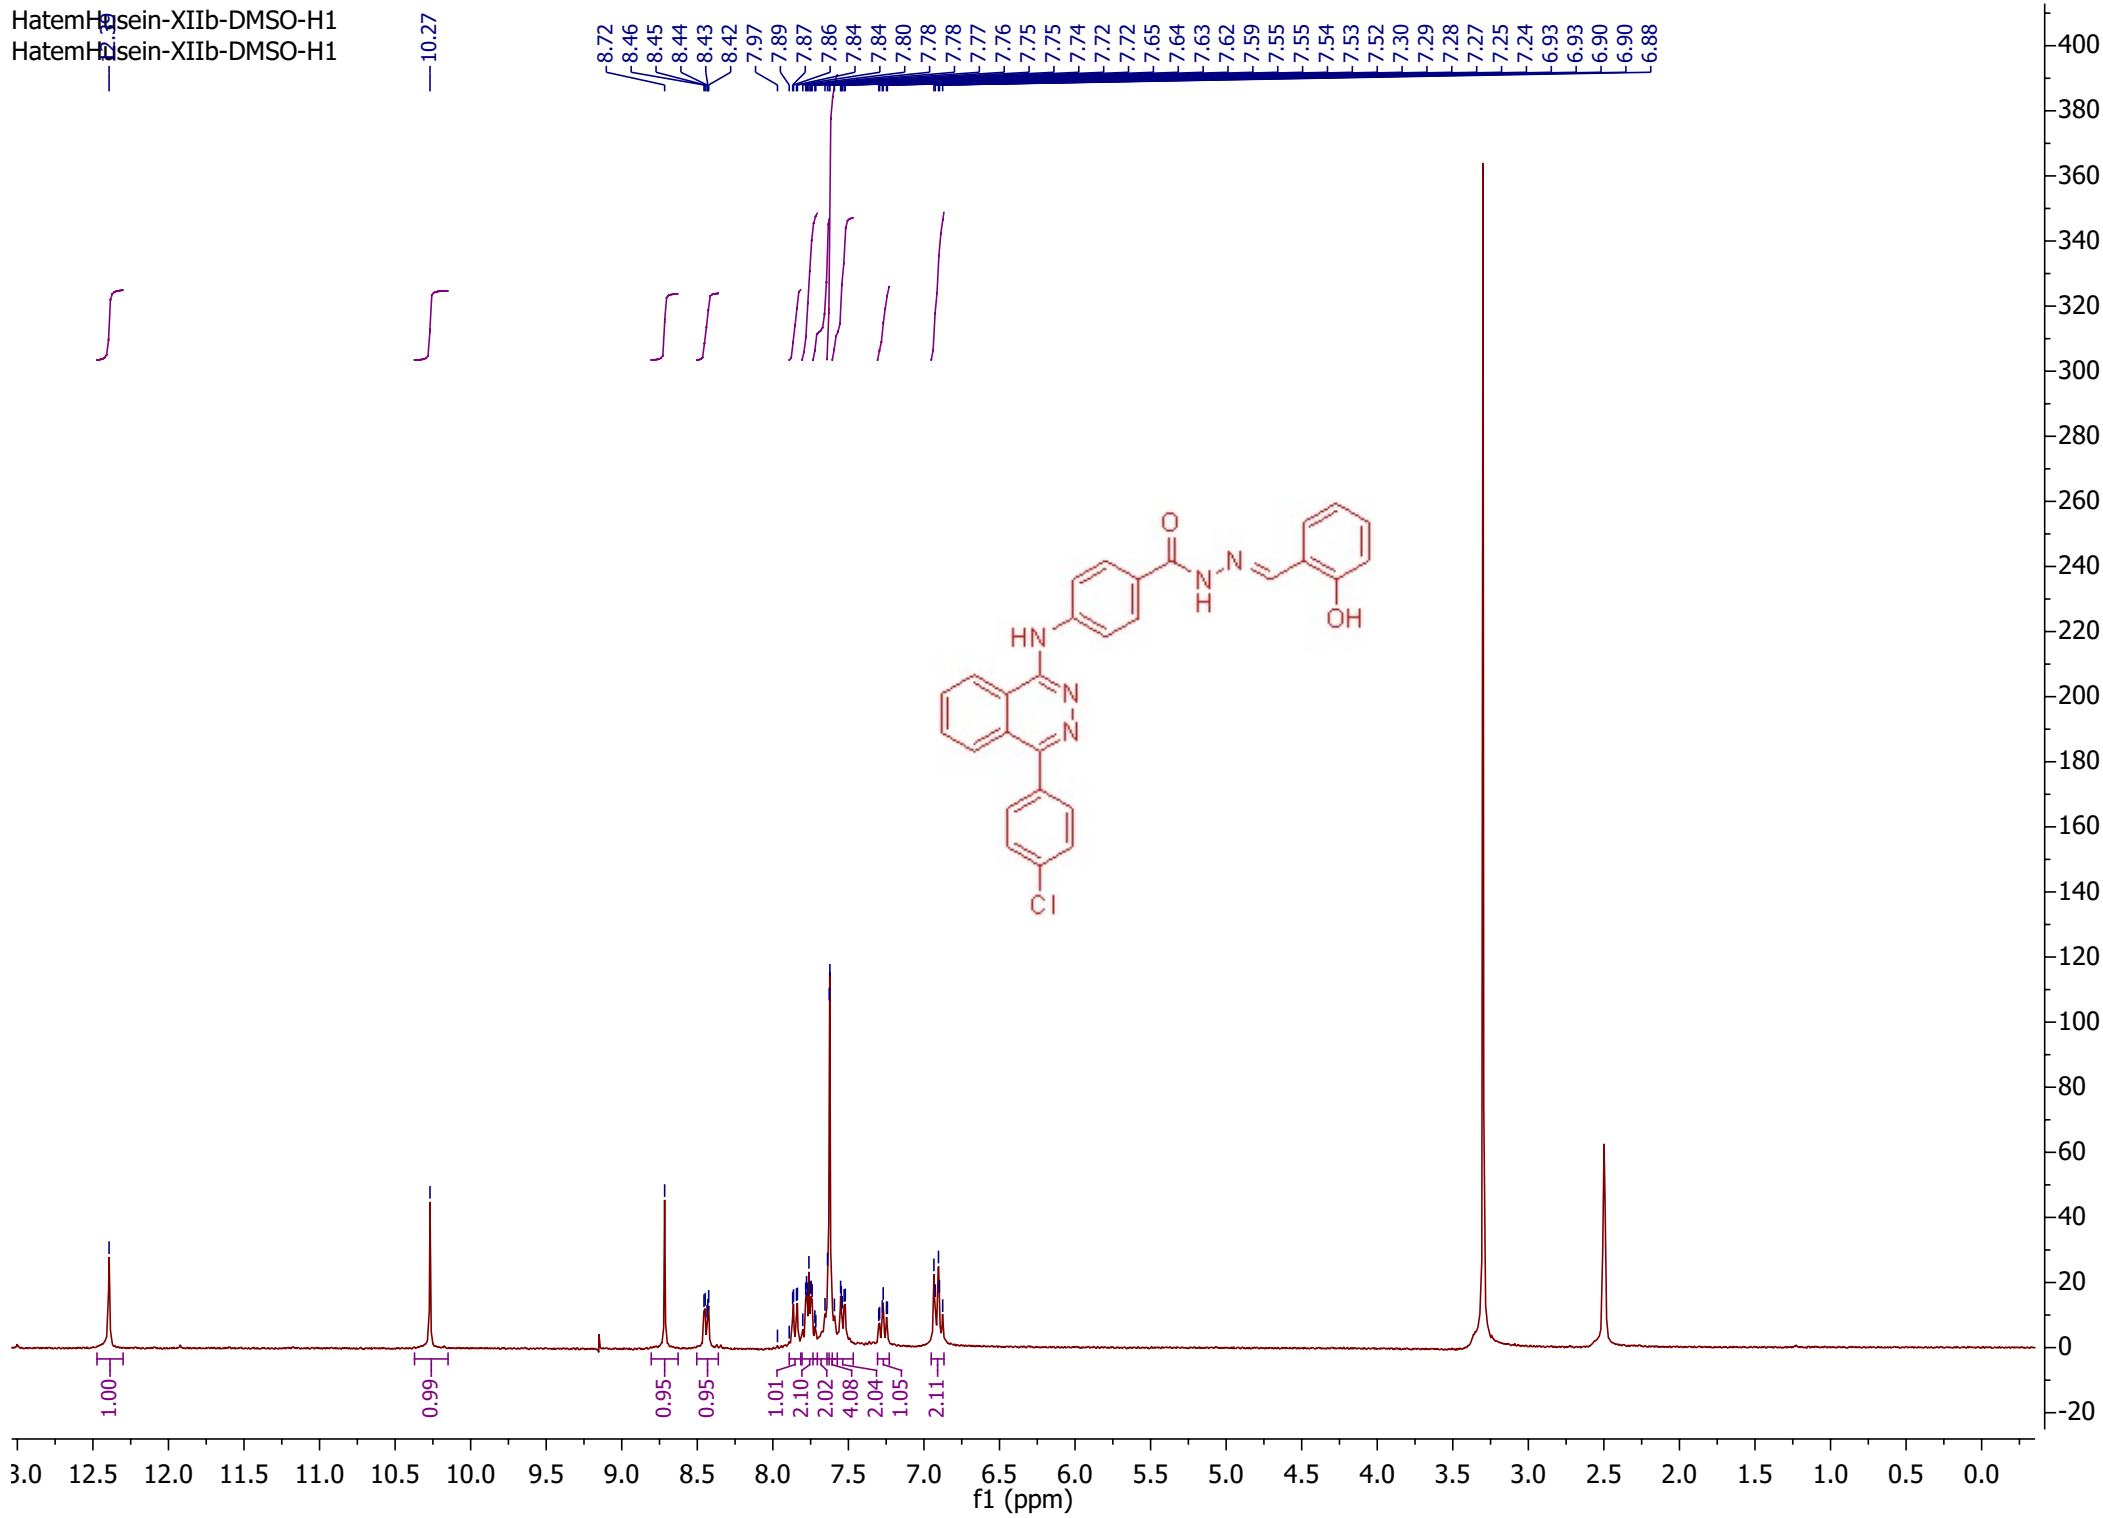

HatemHusein-XIIF-DMSO-H1  
HatemHusein-XIIF-DMSO-H1

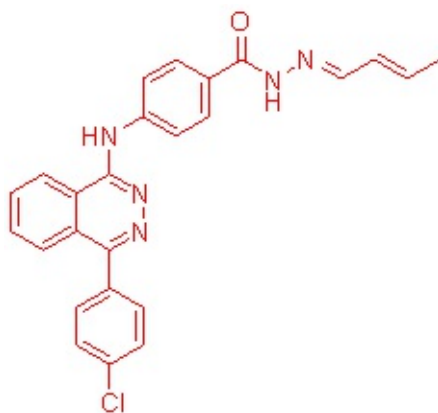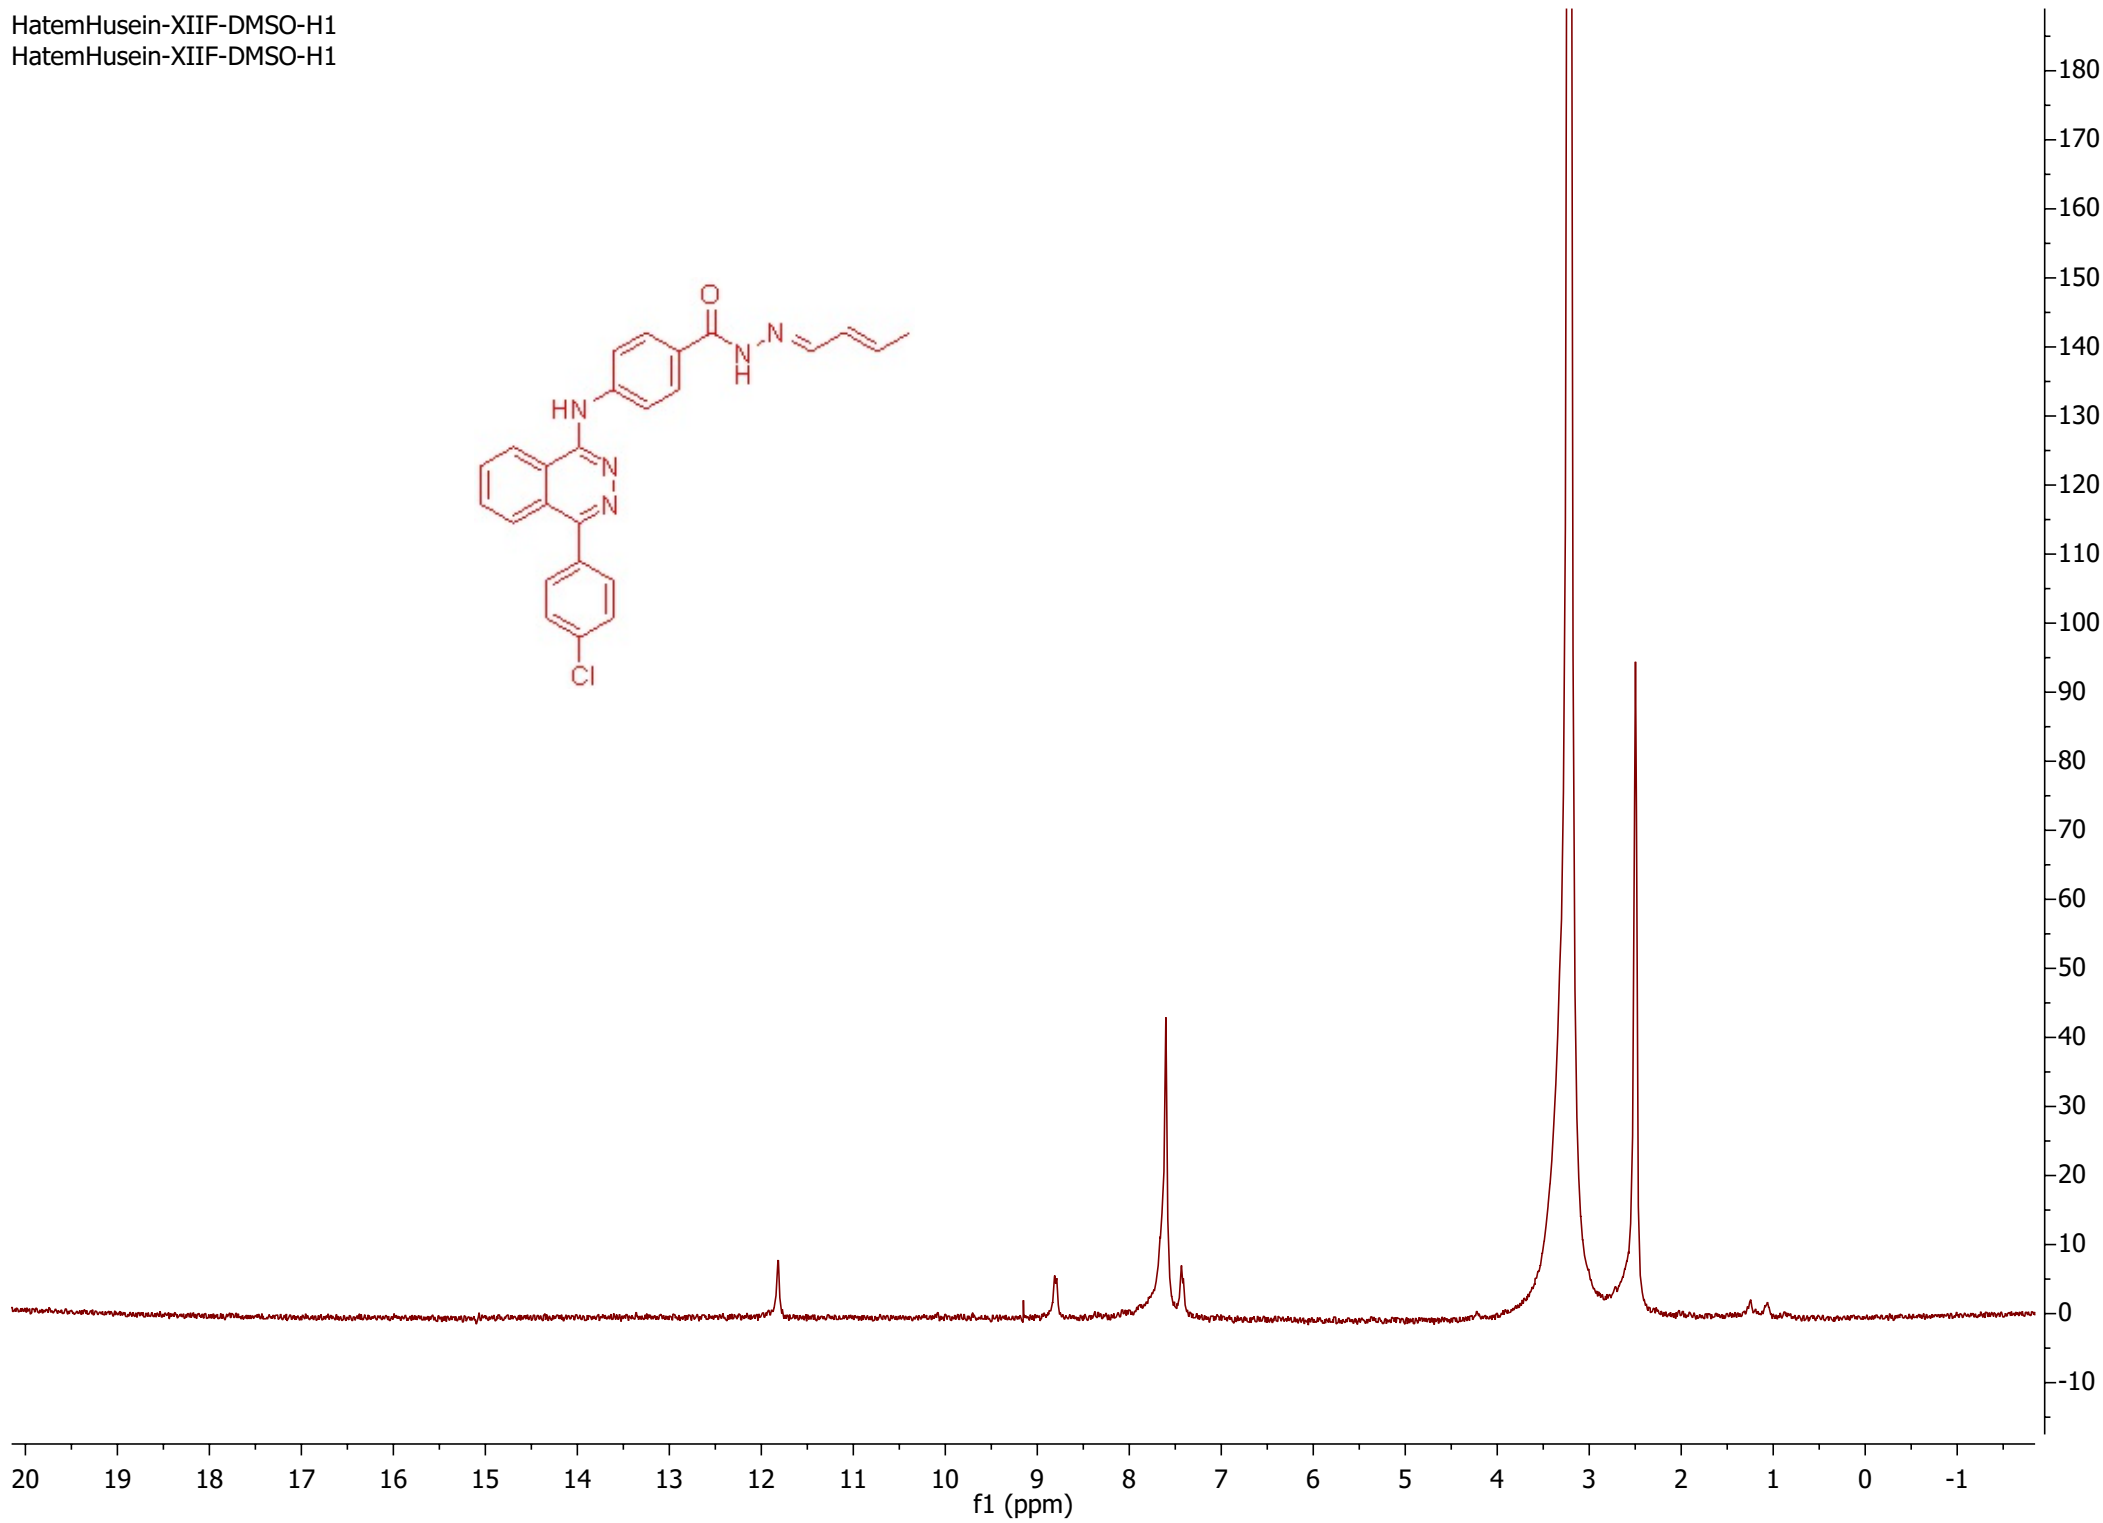



HatemHusein-XIIg-DMSO-H1  
HatemHusein-XIIg-DMSO-H1

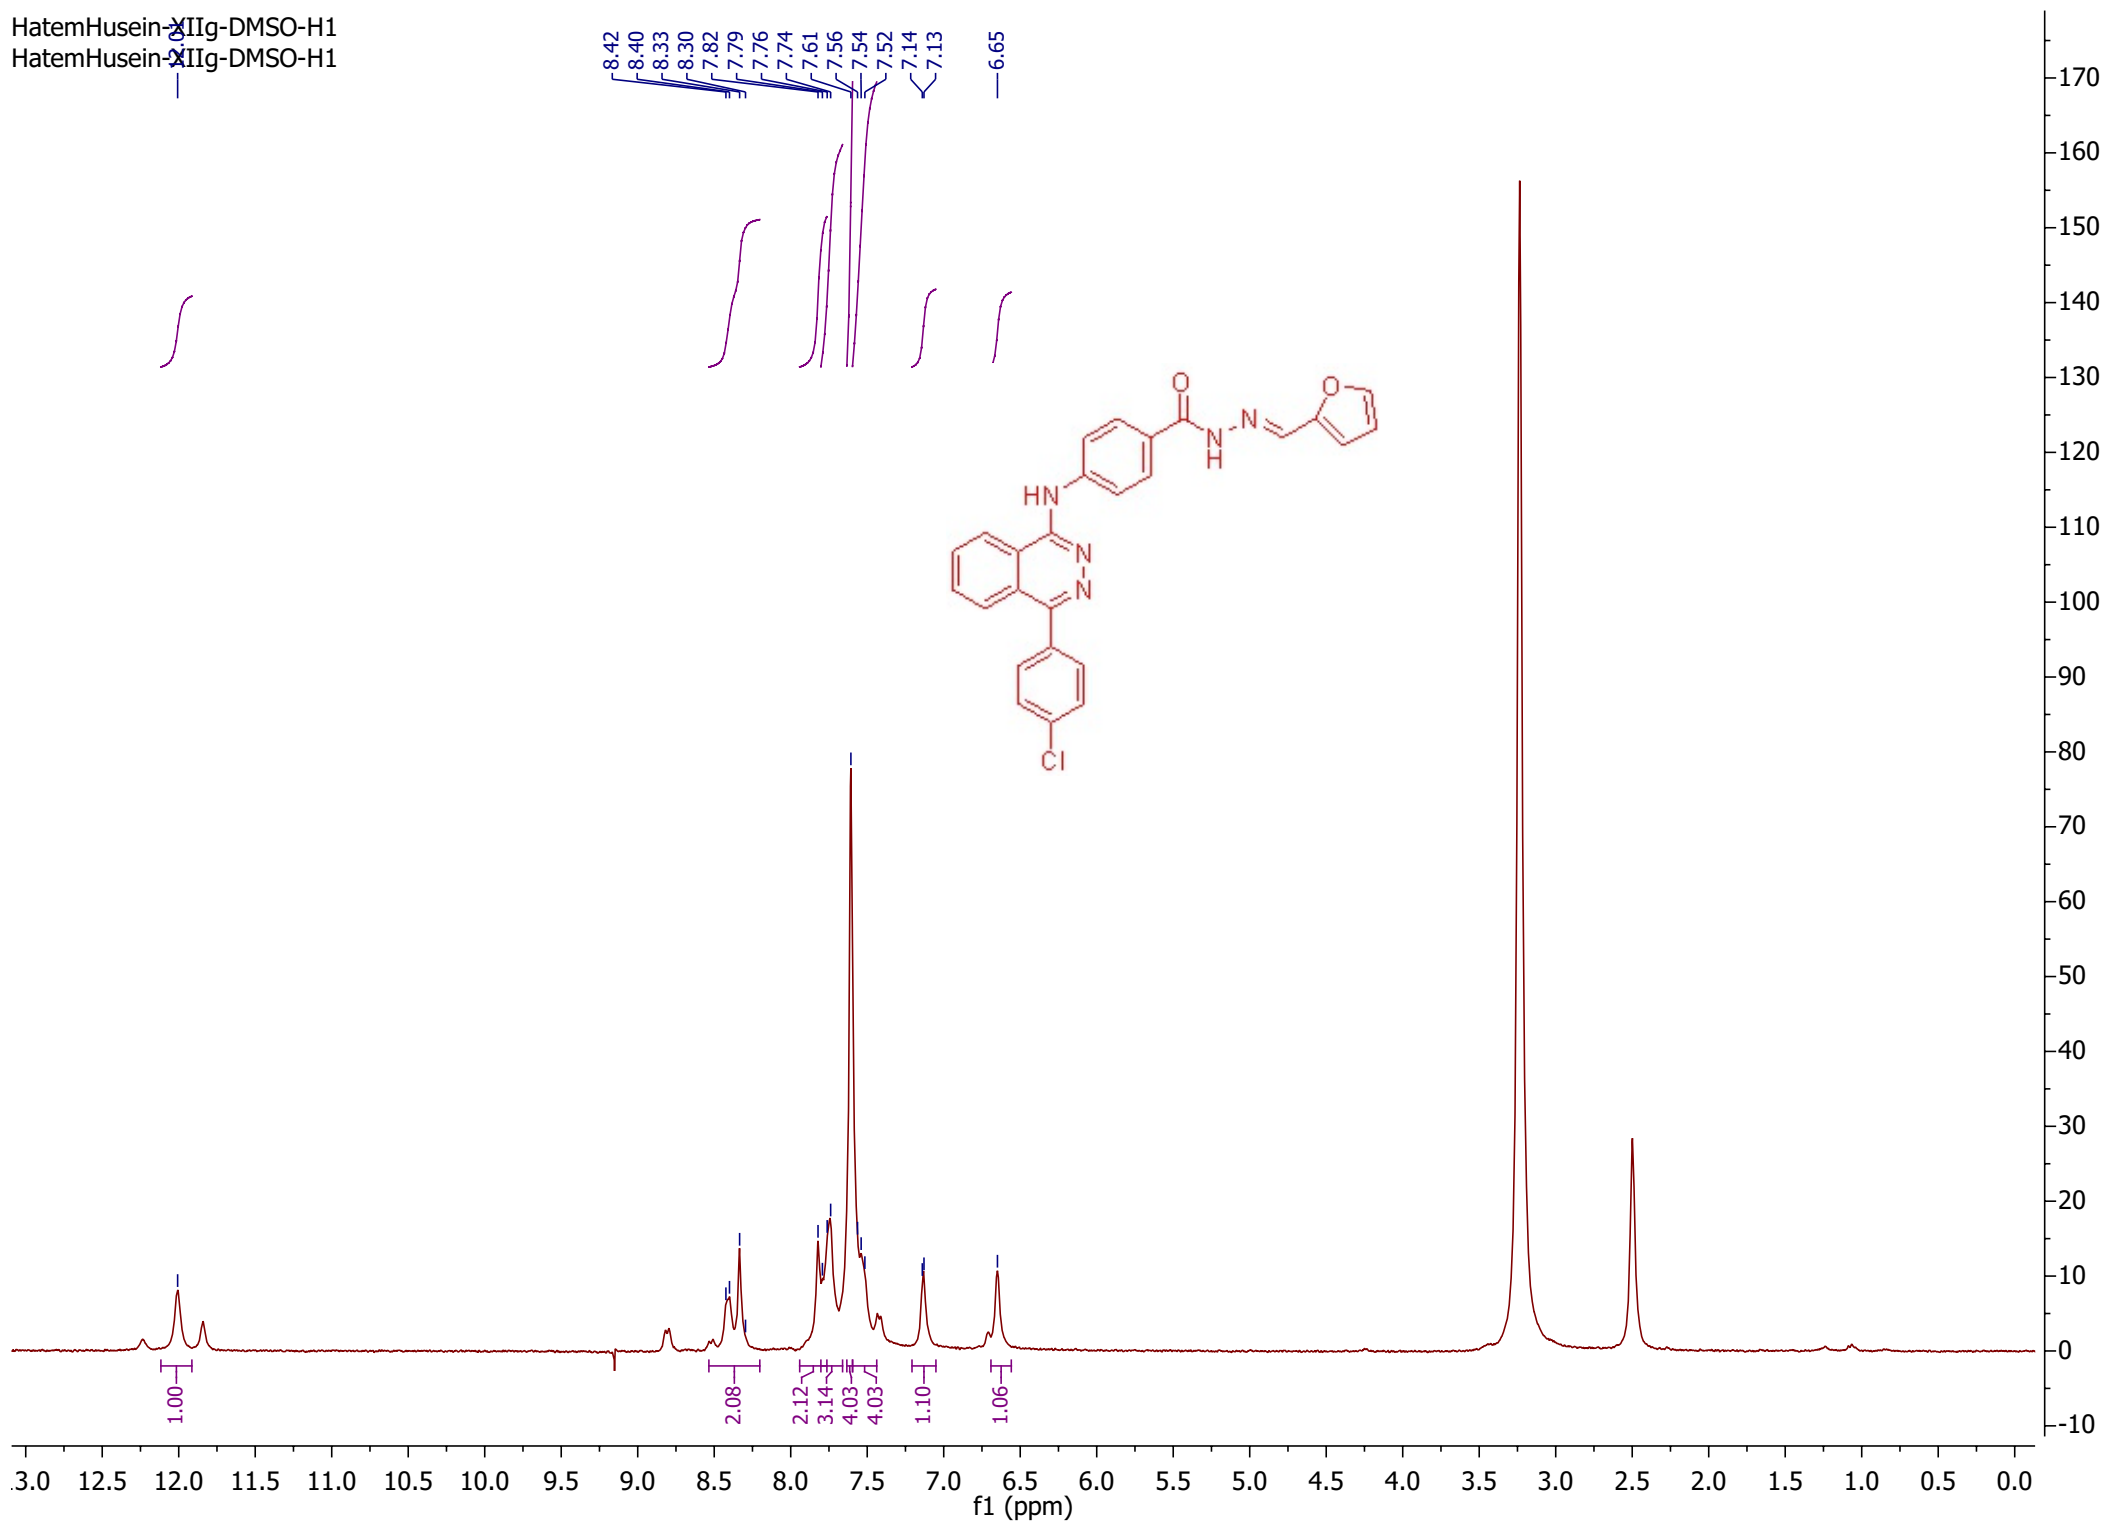

HatemHusein-XXa-DMSO-H1  
HatemHusein-XXa-DMSO-H1

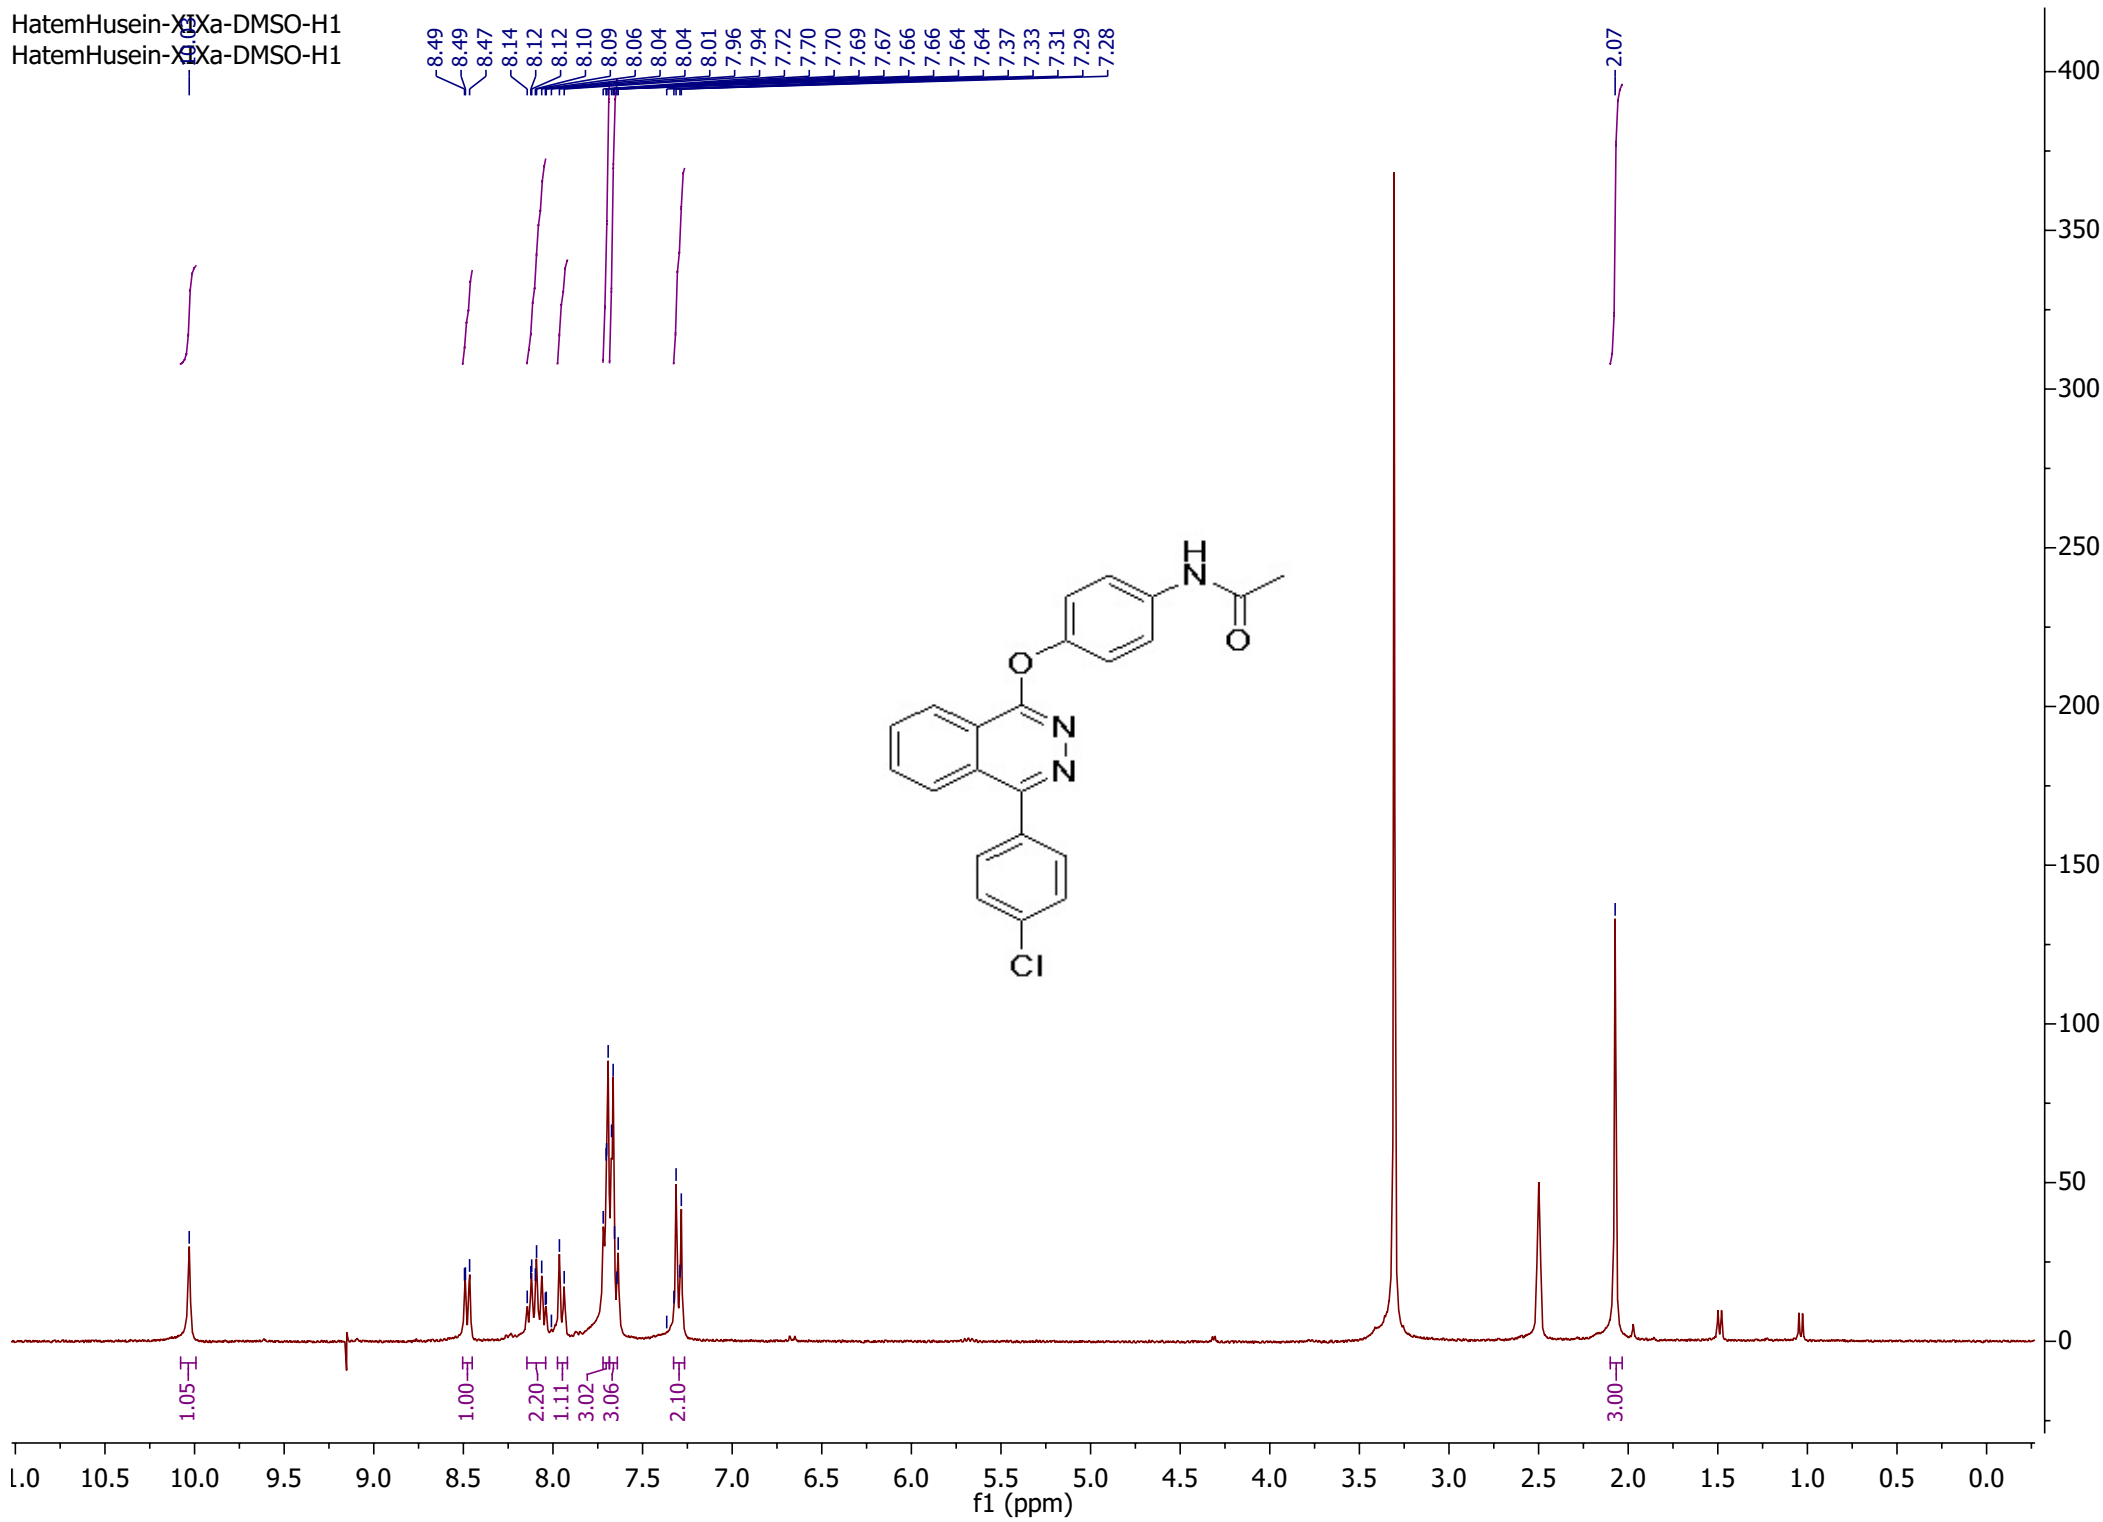

Hatem Hussein XIXE-DMSO-H1  
Hatem Hussein XIXE-DMSO-H1

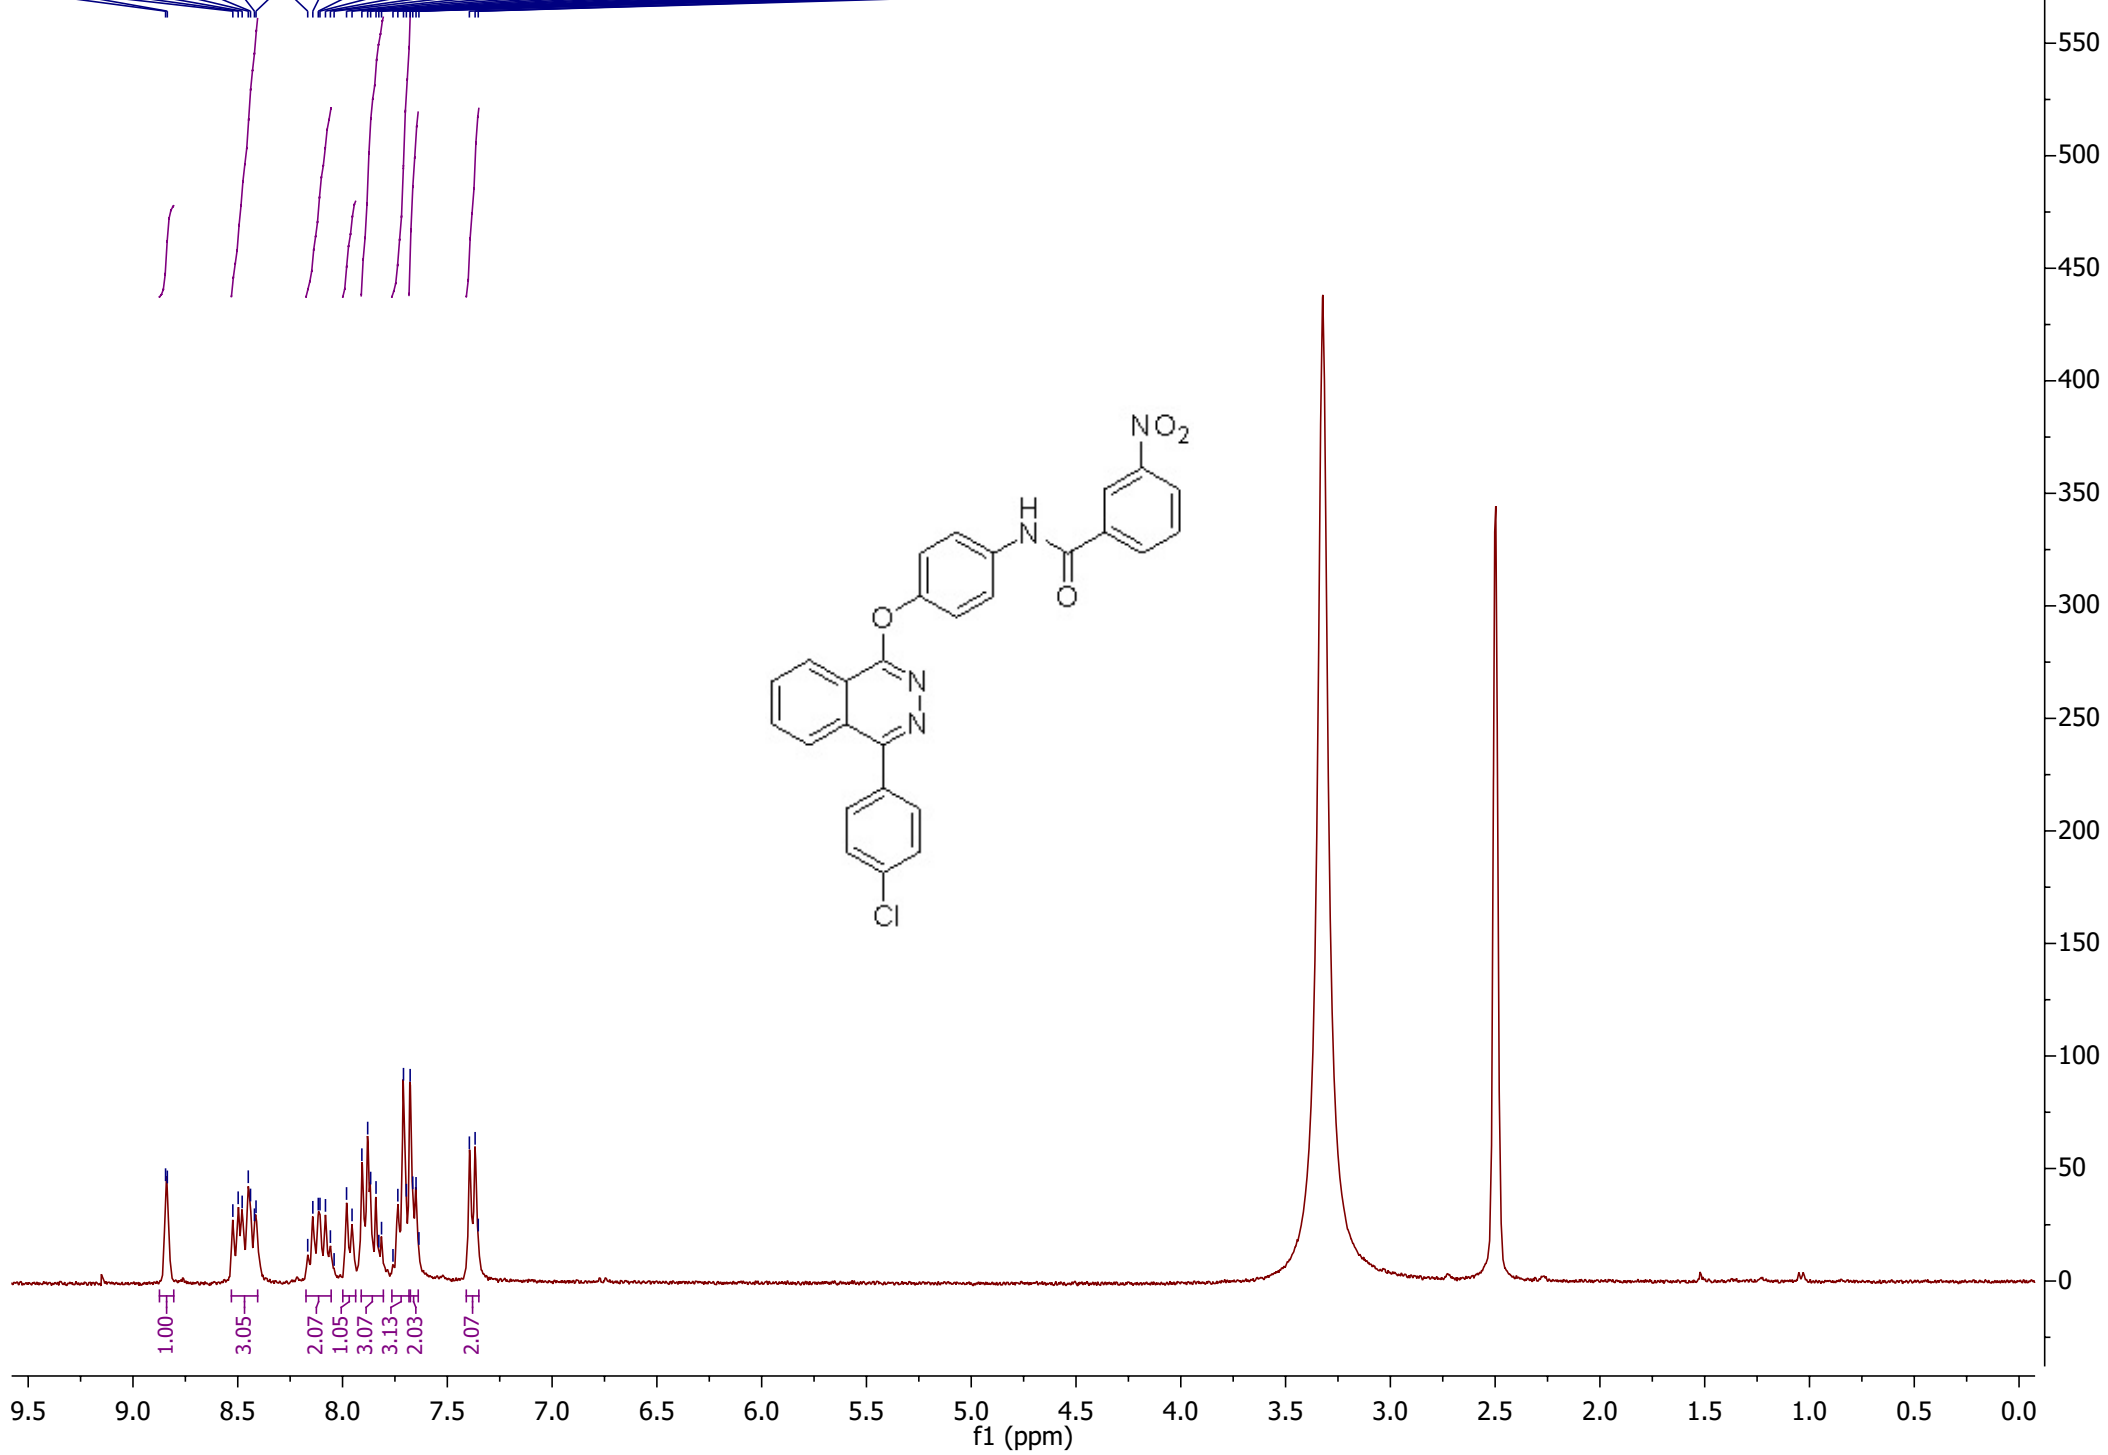

HatemHusein-XVb-DMSO-H1  
HatemHusein-XVb-DMSO-H1

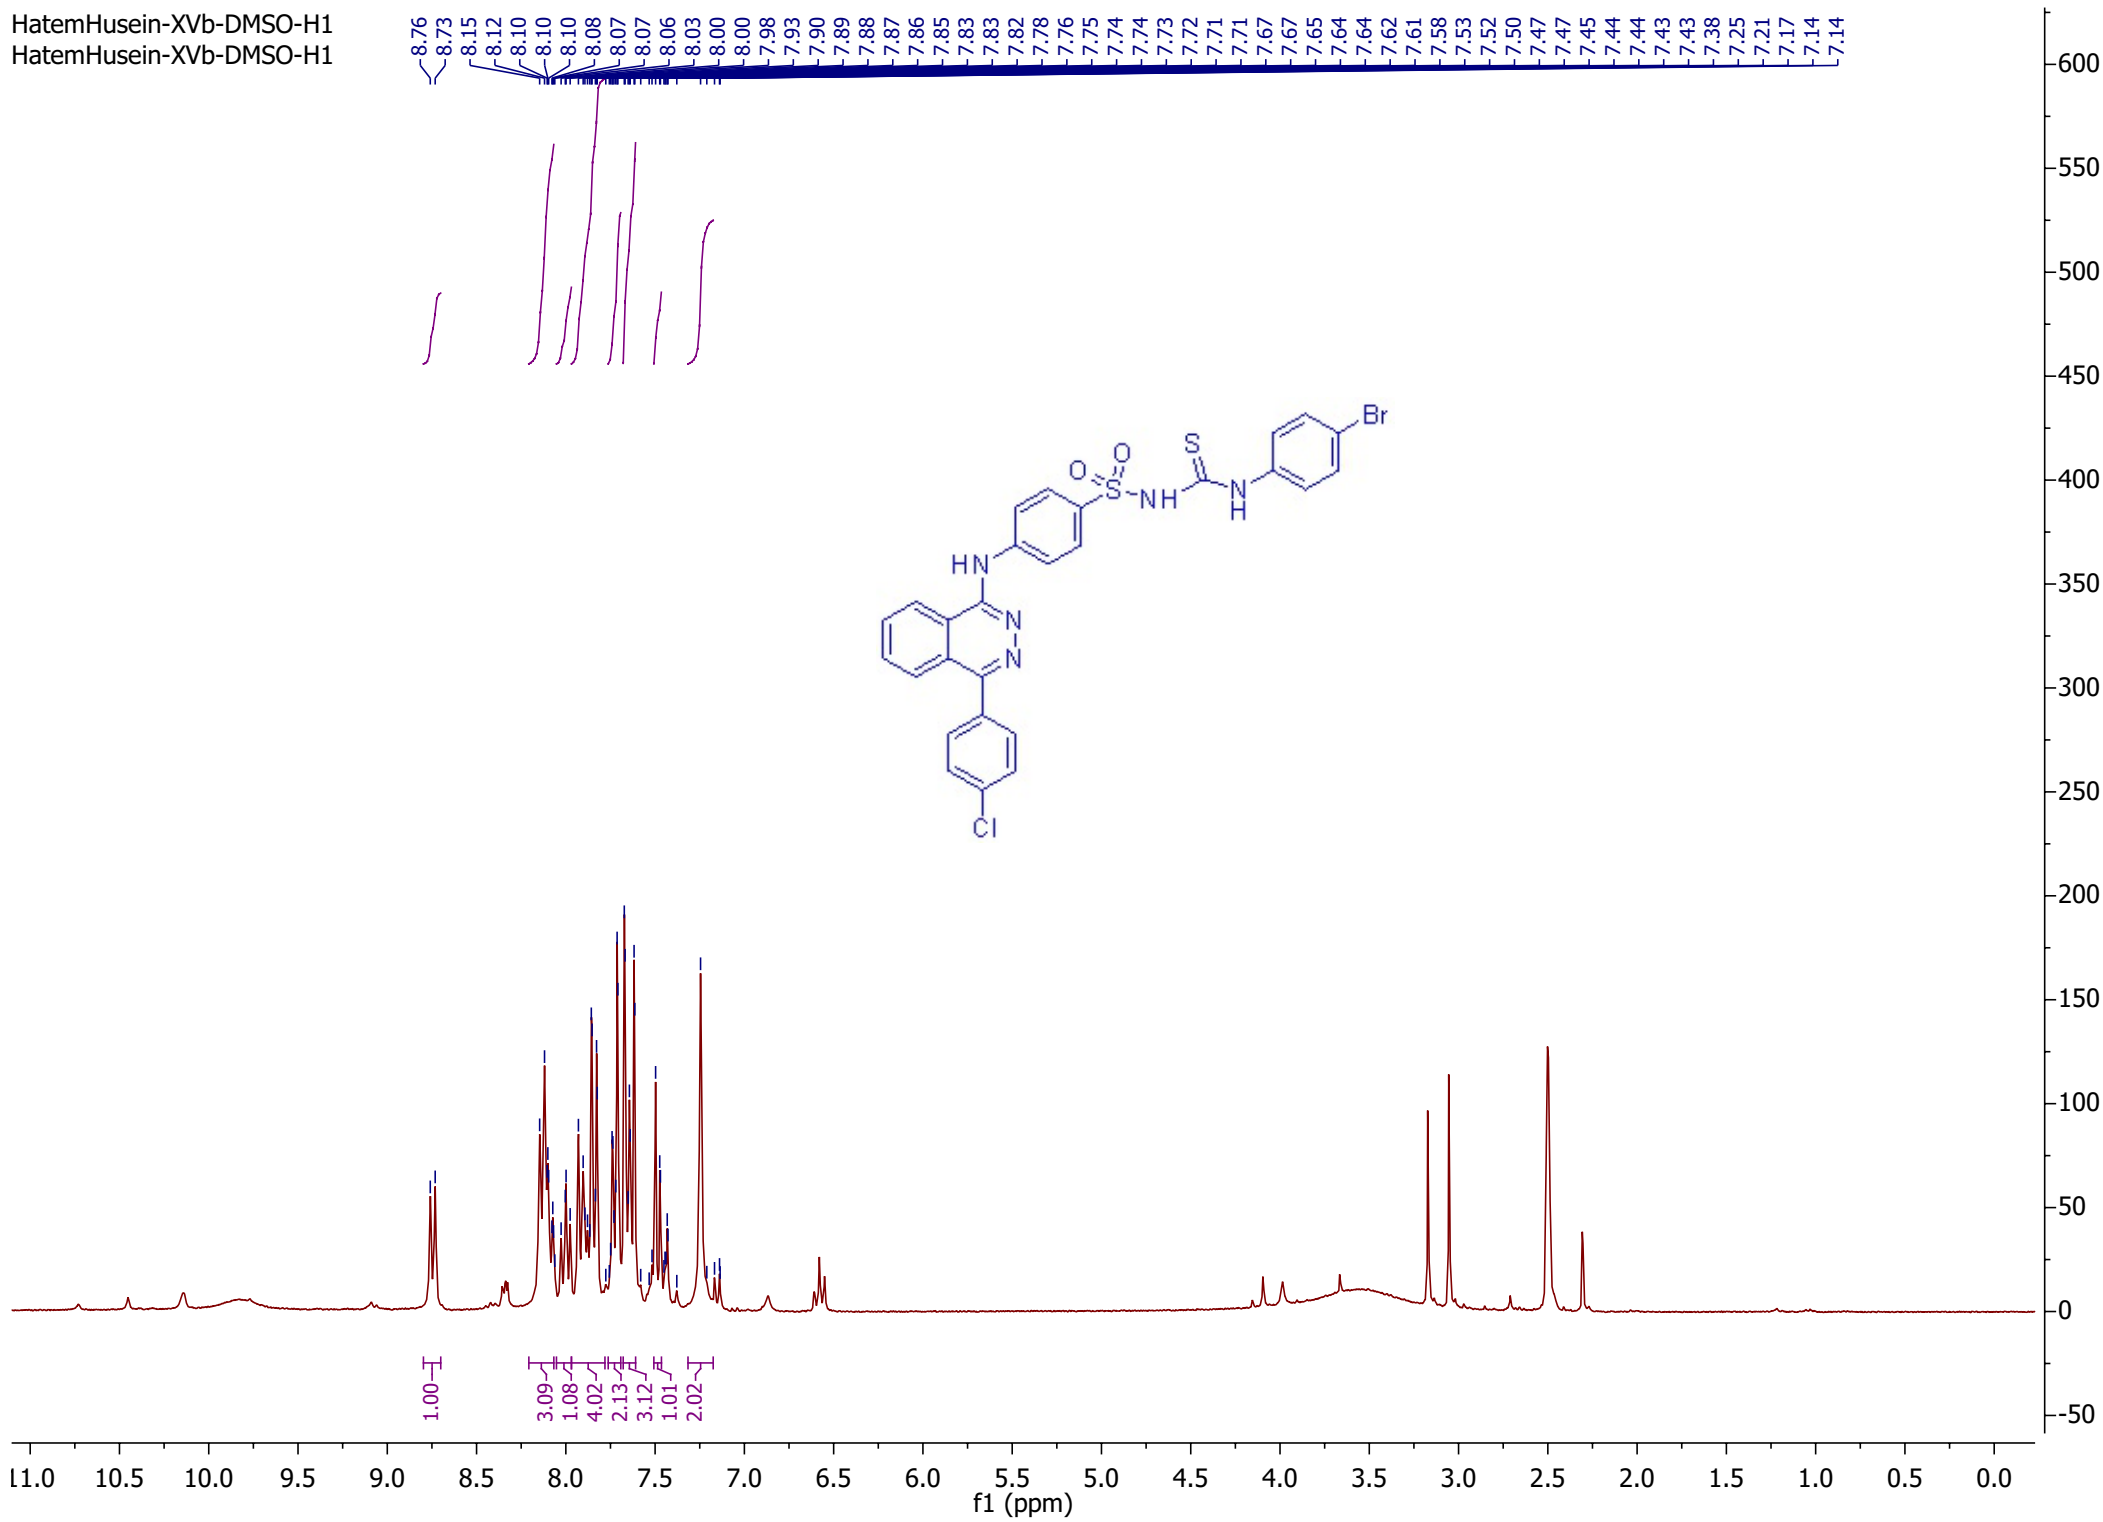

HatemHusein-XVIIb-DMSO-d<sub>6</sub>-H<sub>2</sub>O  
HatemHusein-XVIIb-DMSO-d<sub>6</sub>-H<sub>2</sub>O

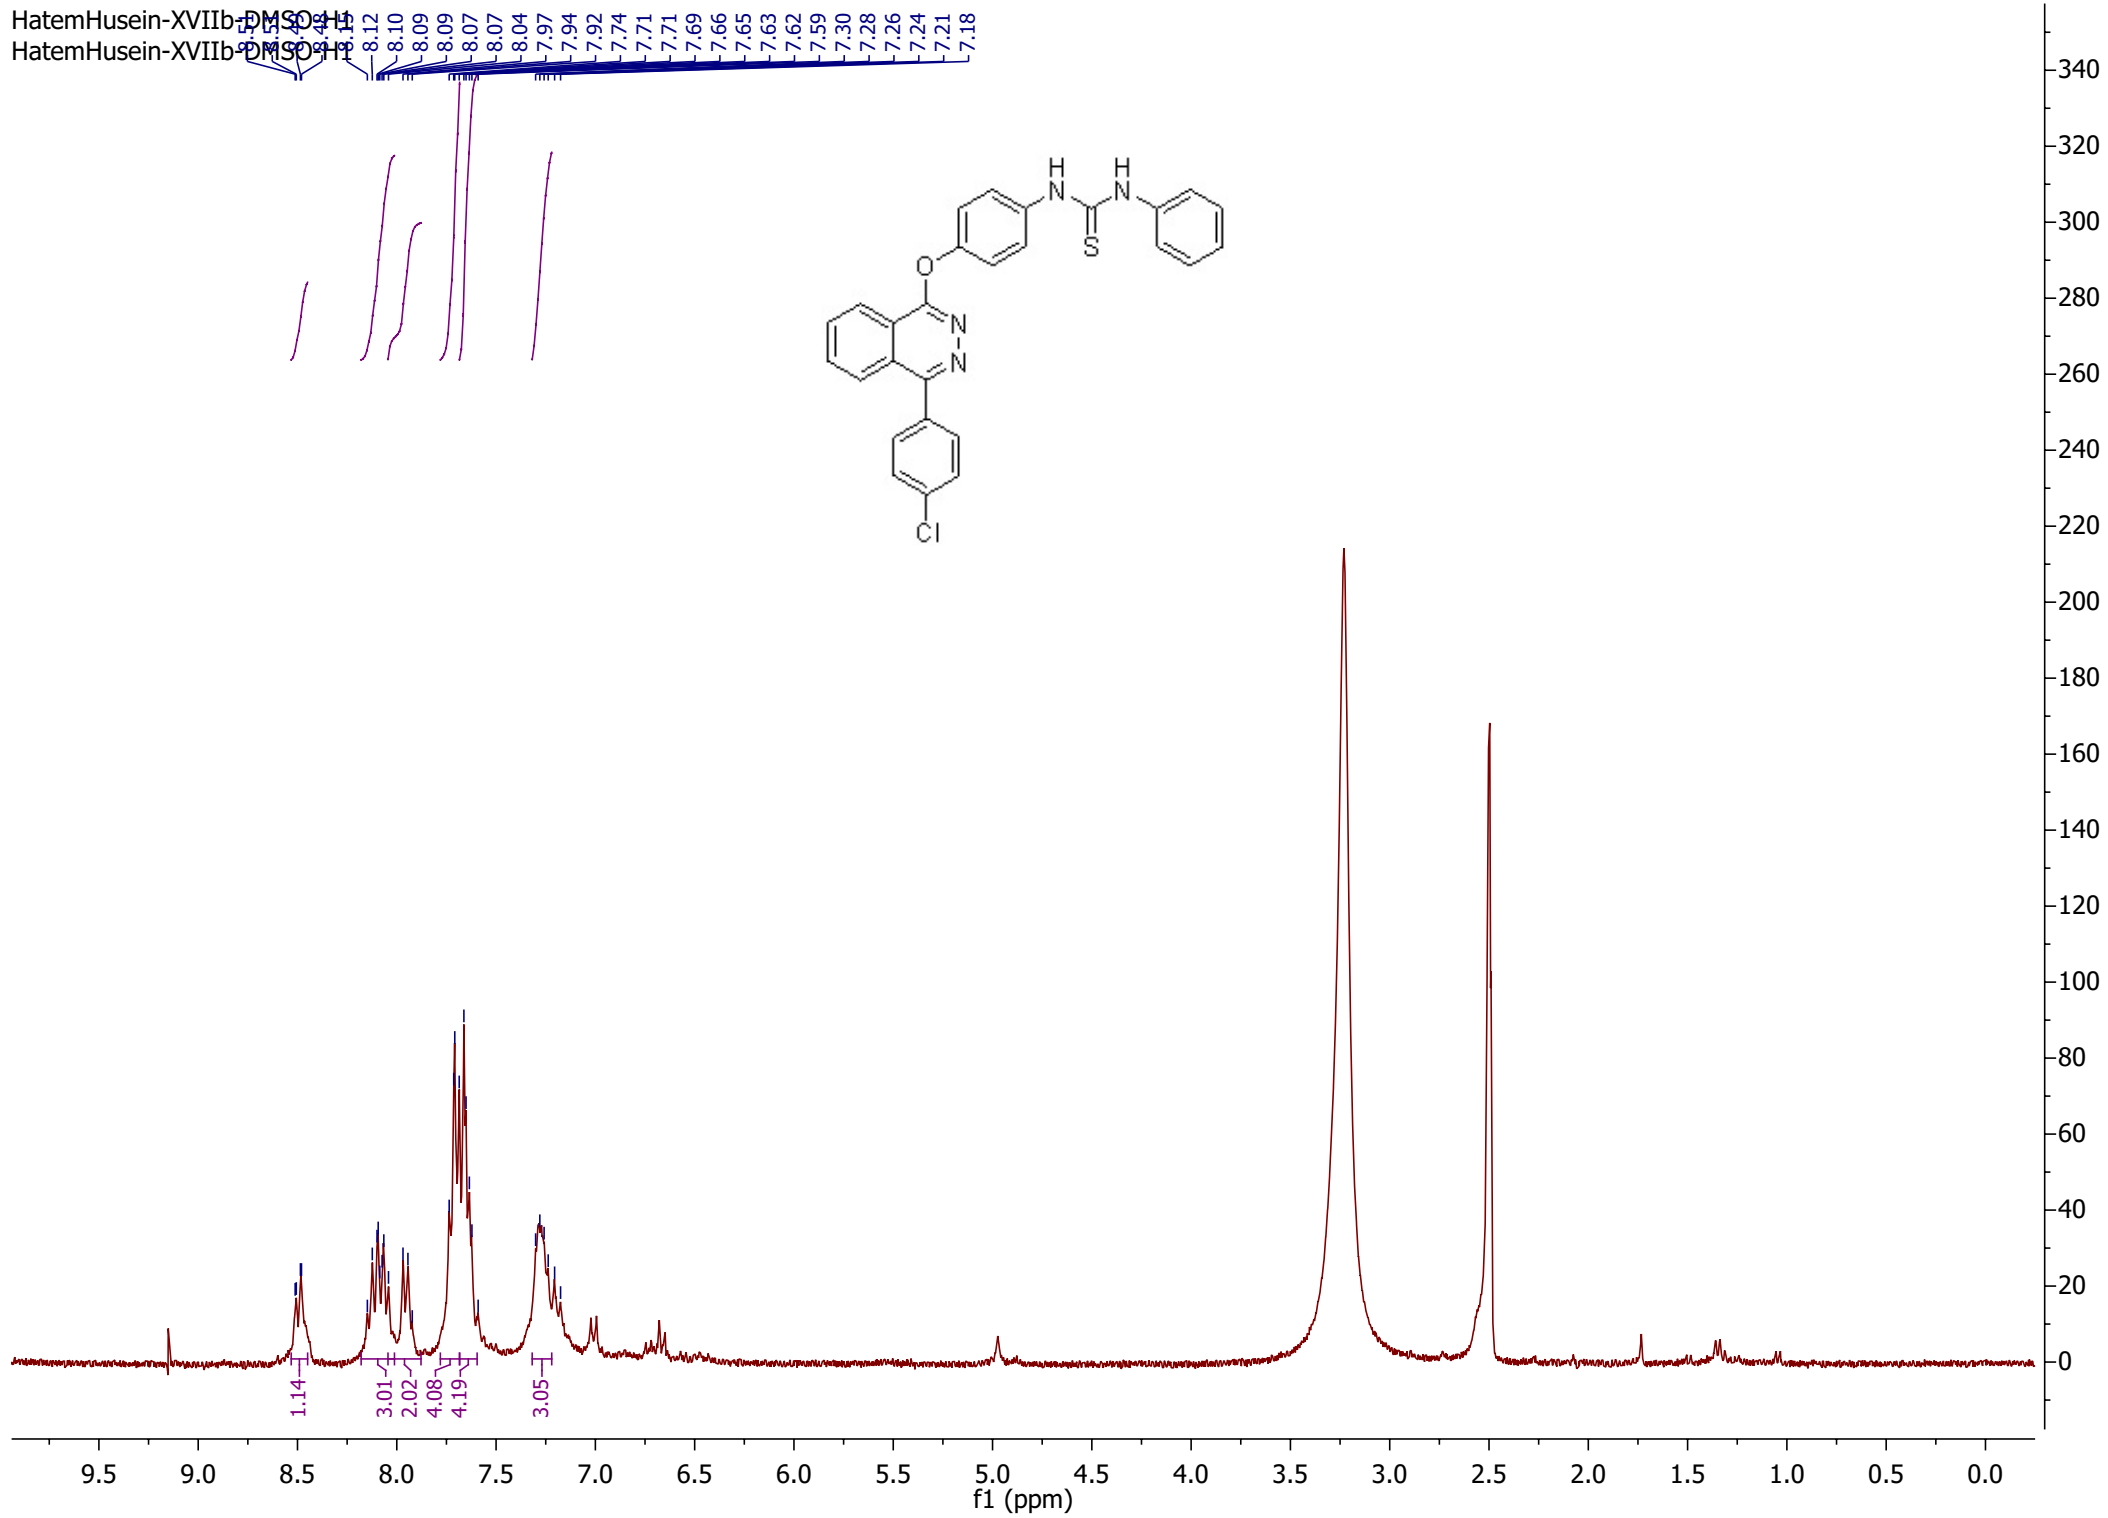

Supplement: d4ra03459g1.pdf [file d4ra03459g1.pdf]
