# Supplementary material for: Exploration of the VEGFR-2 inhibition activity of phthalazine derivatives: design, synthesis, cytotoxicity, ADMET, molecular docking and dynamic simulation
Source: Royal Society of Chemistry journal article supplement (doi:10.1039/d4ra03459g), 2024-01-01

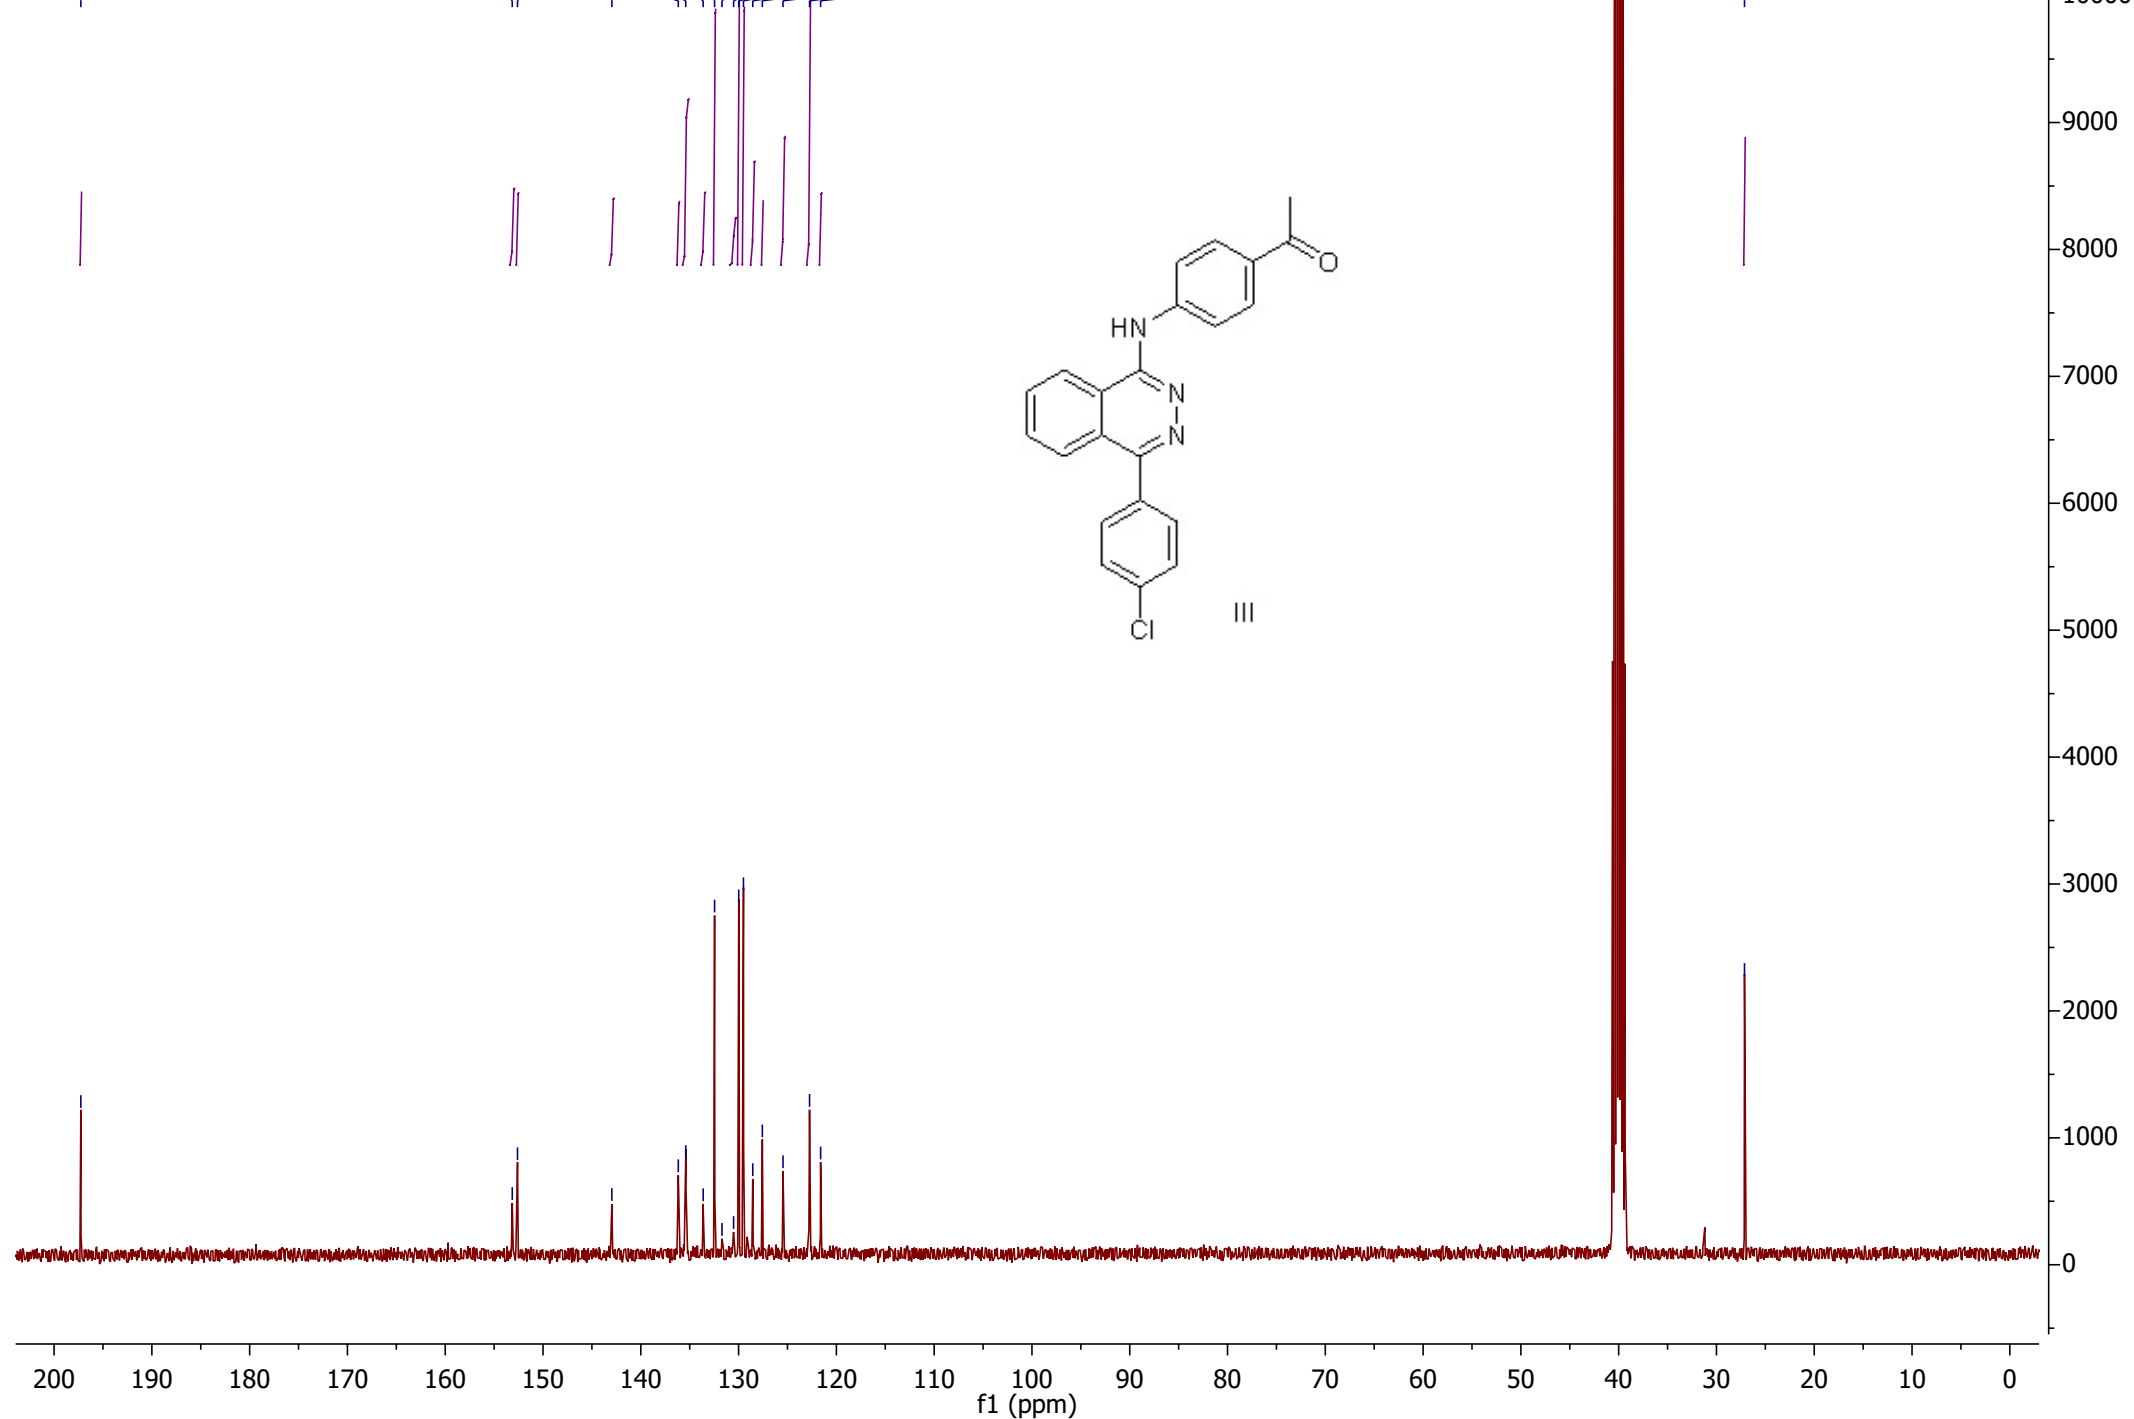

Hatem Abdel-aziz-VI a-C13-RR10.fid  
Hatem Abdel-aziz-VI a-C13-RR10

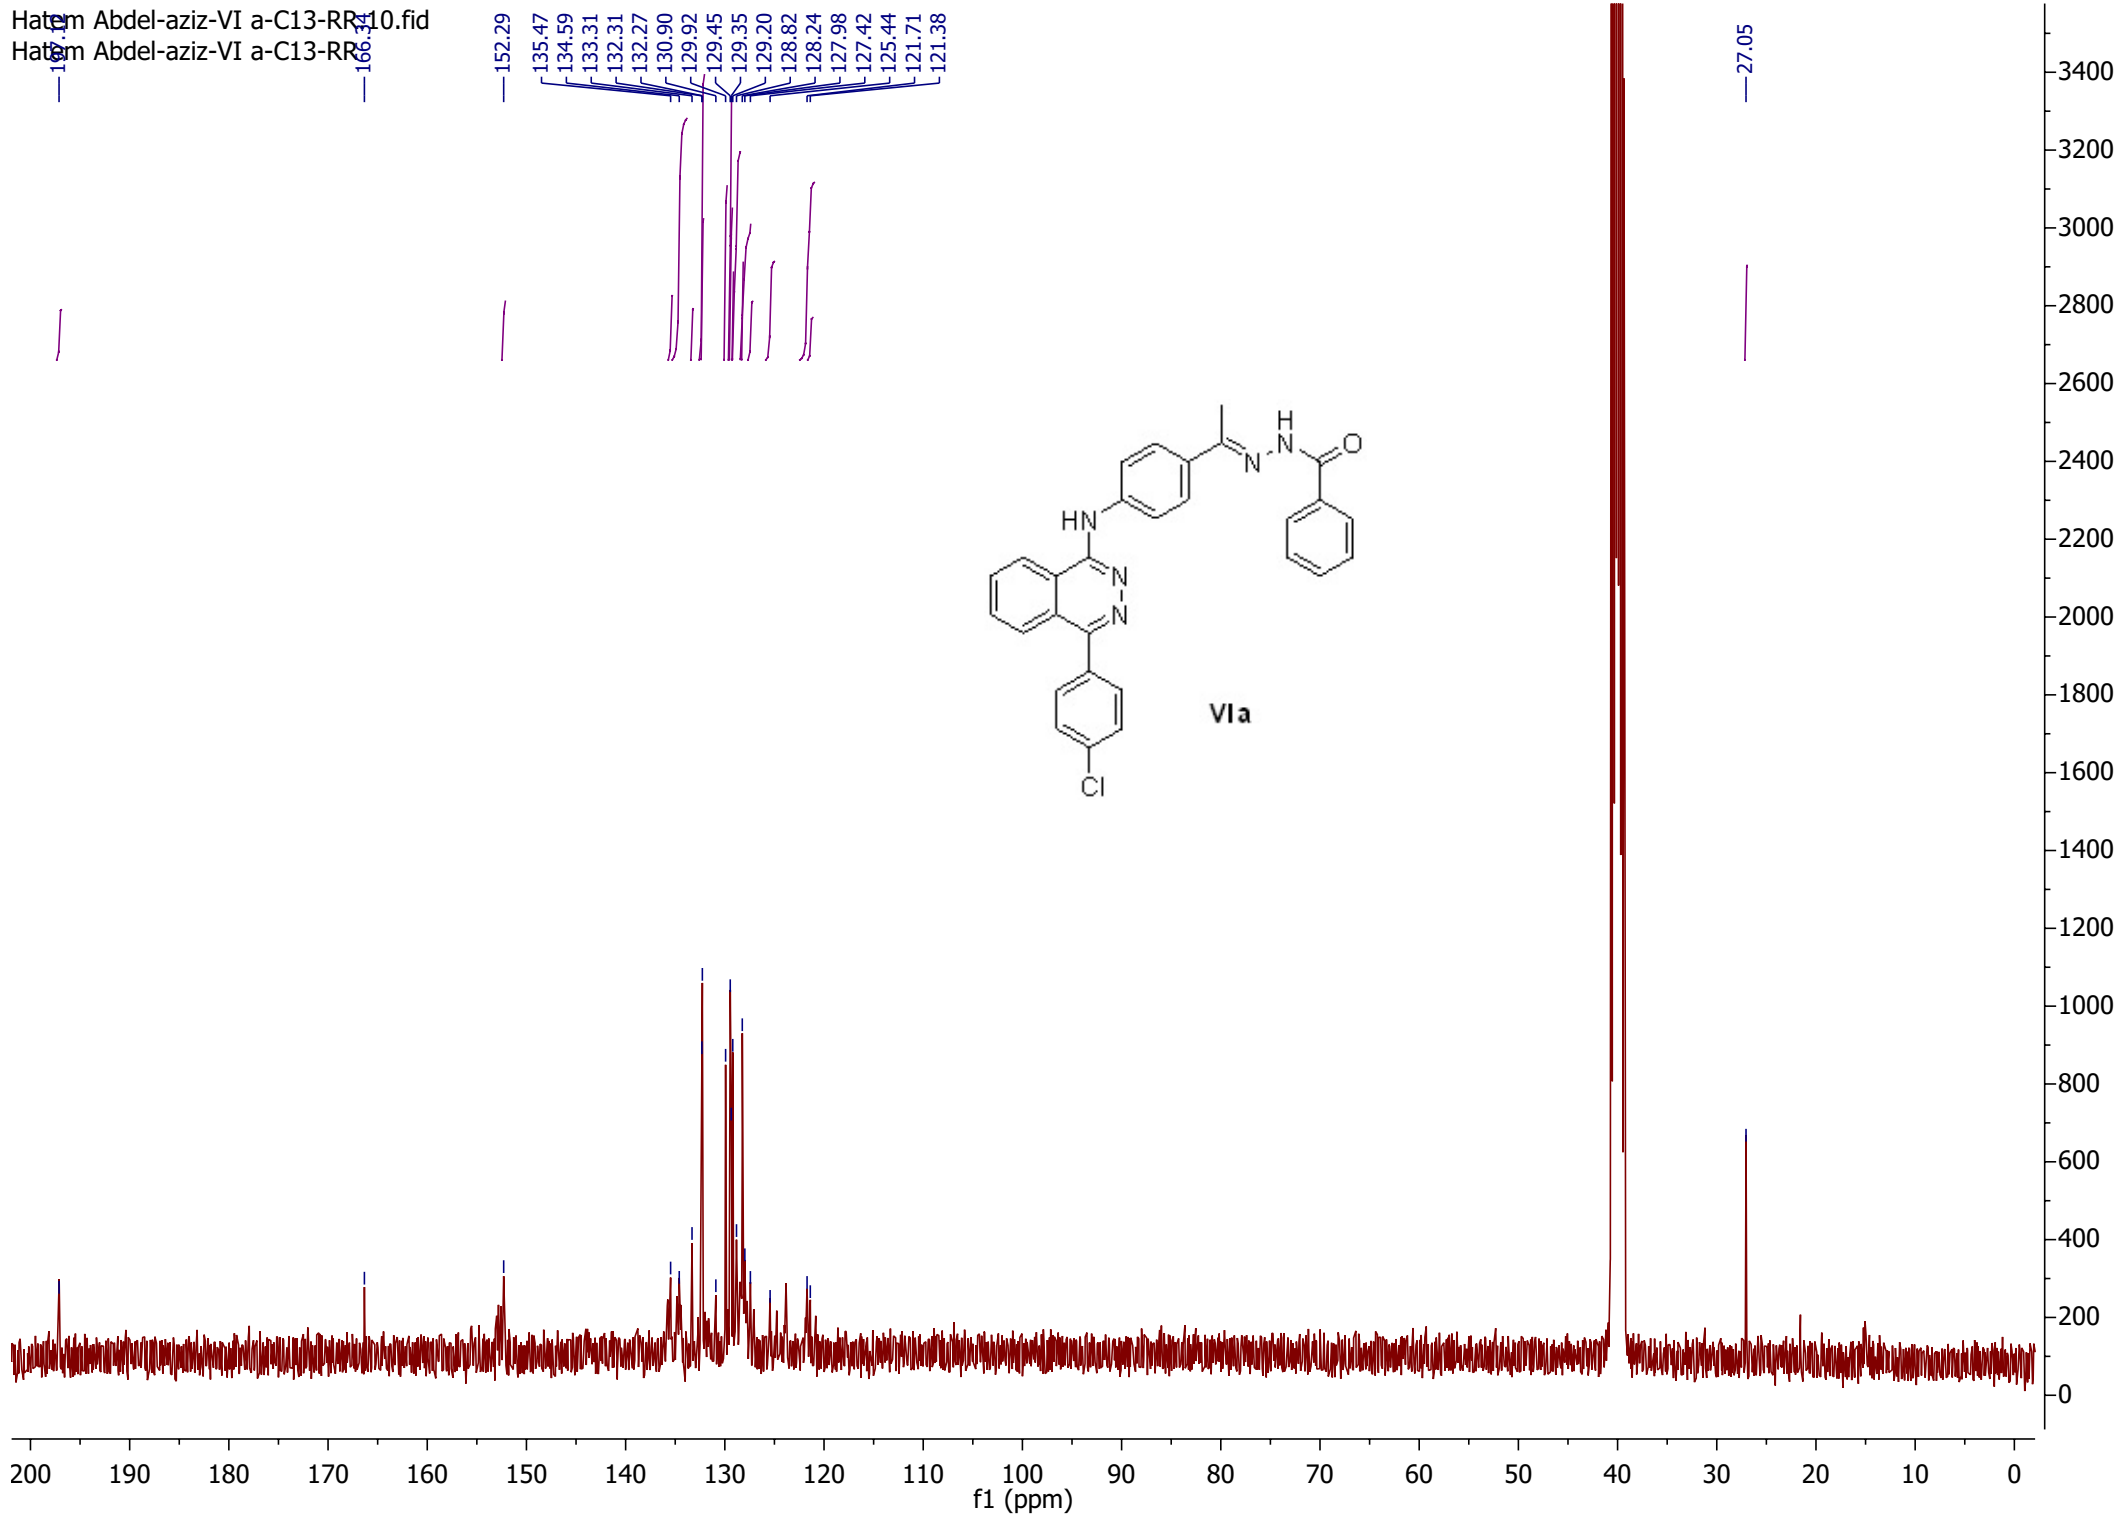

Mohamed Dahab-VIb-C13-RR-10.f  
Mohamed Dahab-VIb-C13-RR-10.f

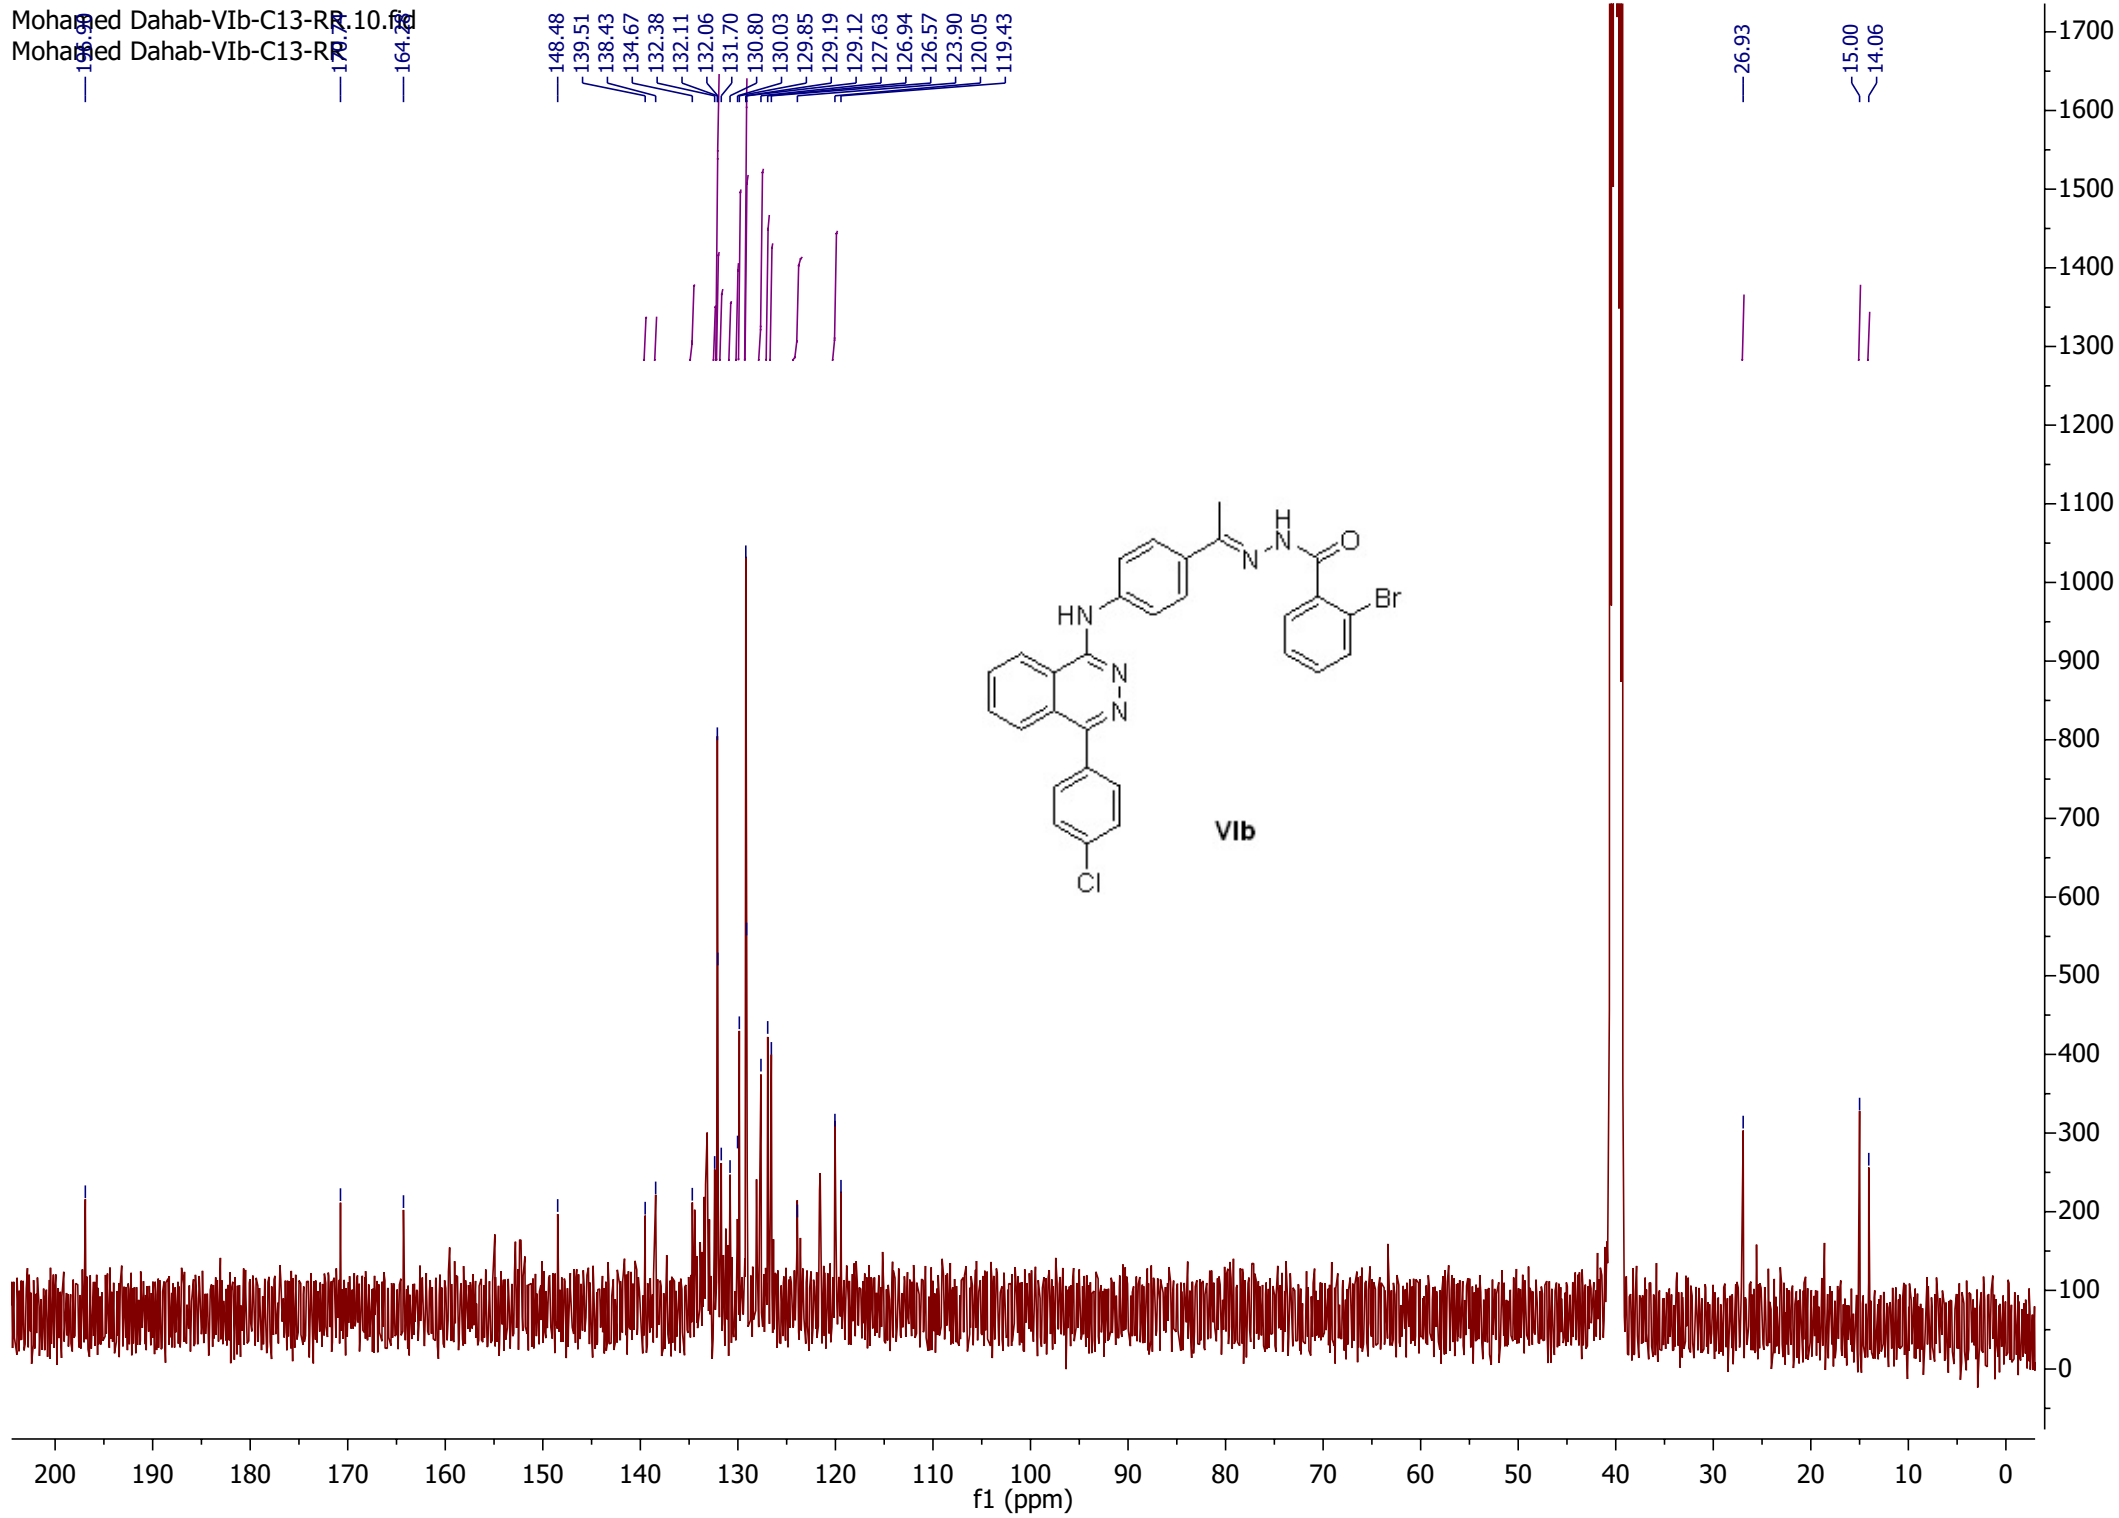

Hatem Abdel-aziz-VI c-C13-PR.10.fid  
Hatem Abdel-aziz-VI c-C13-PR

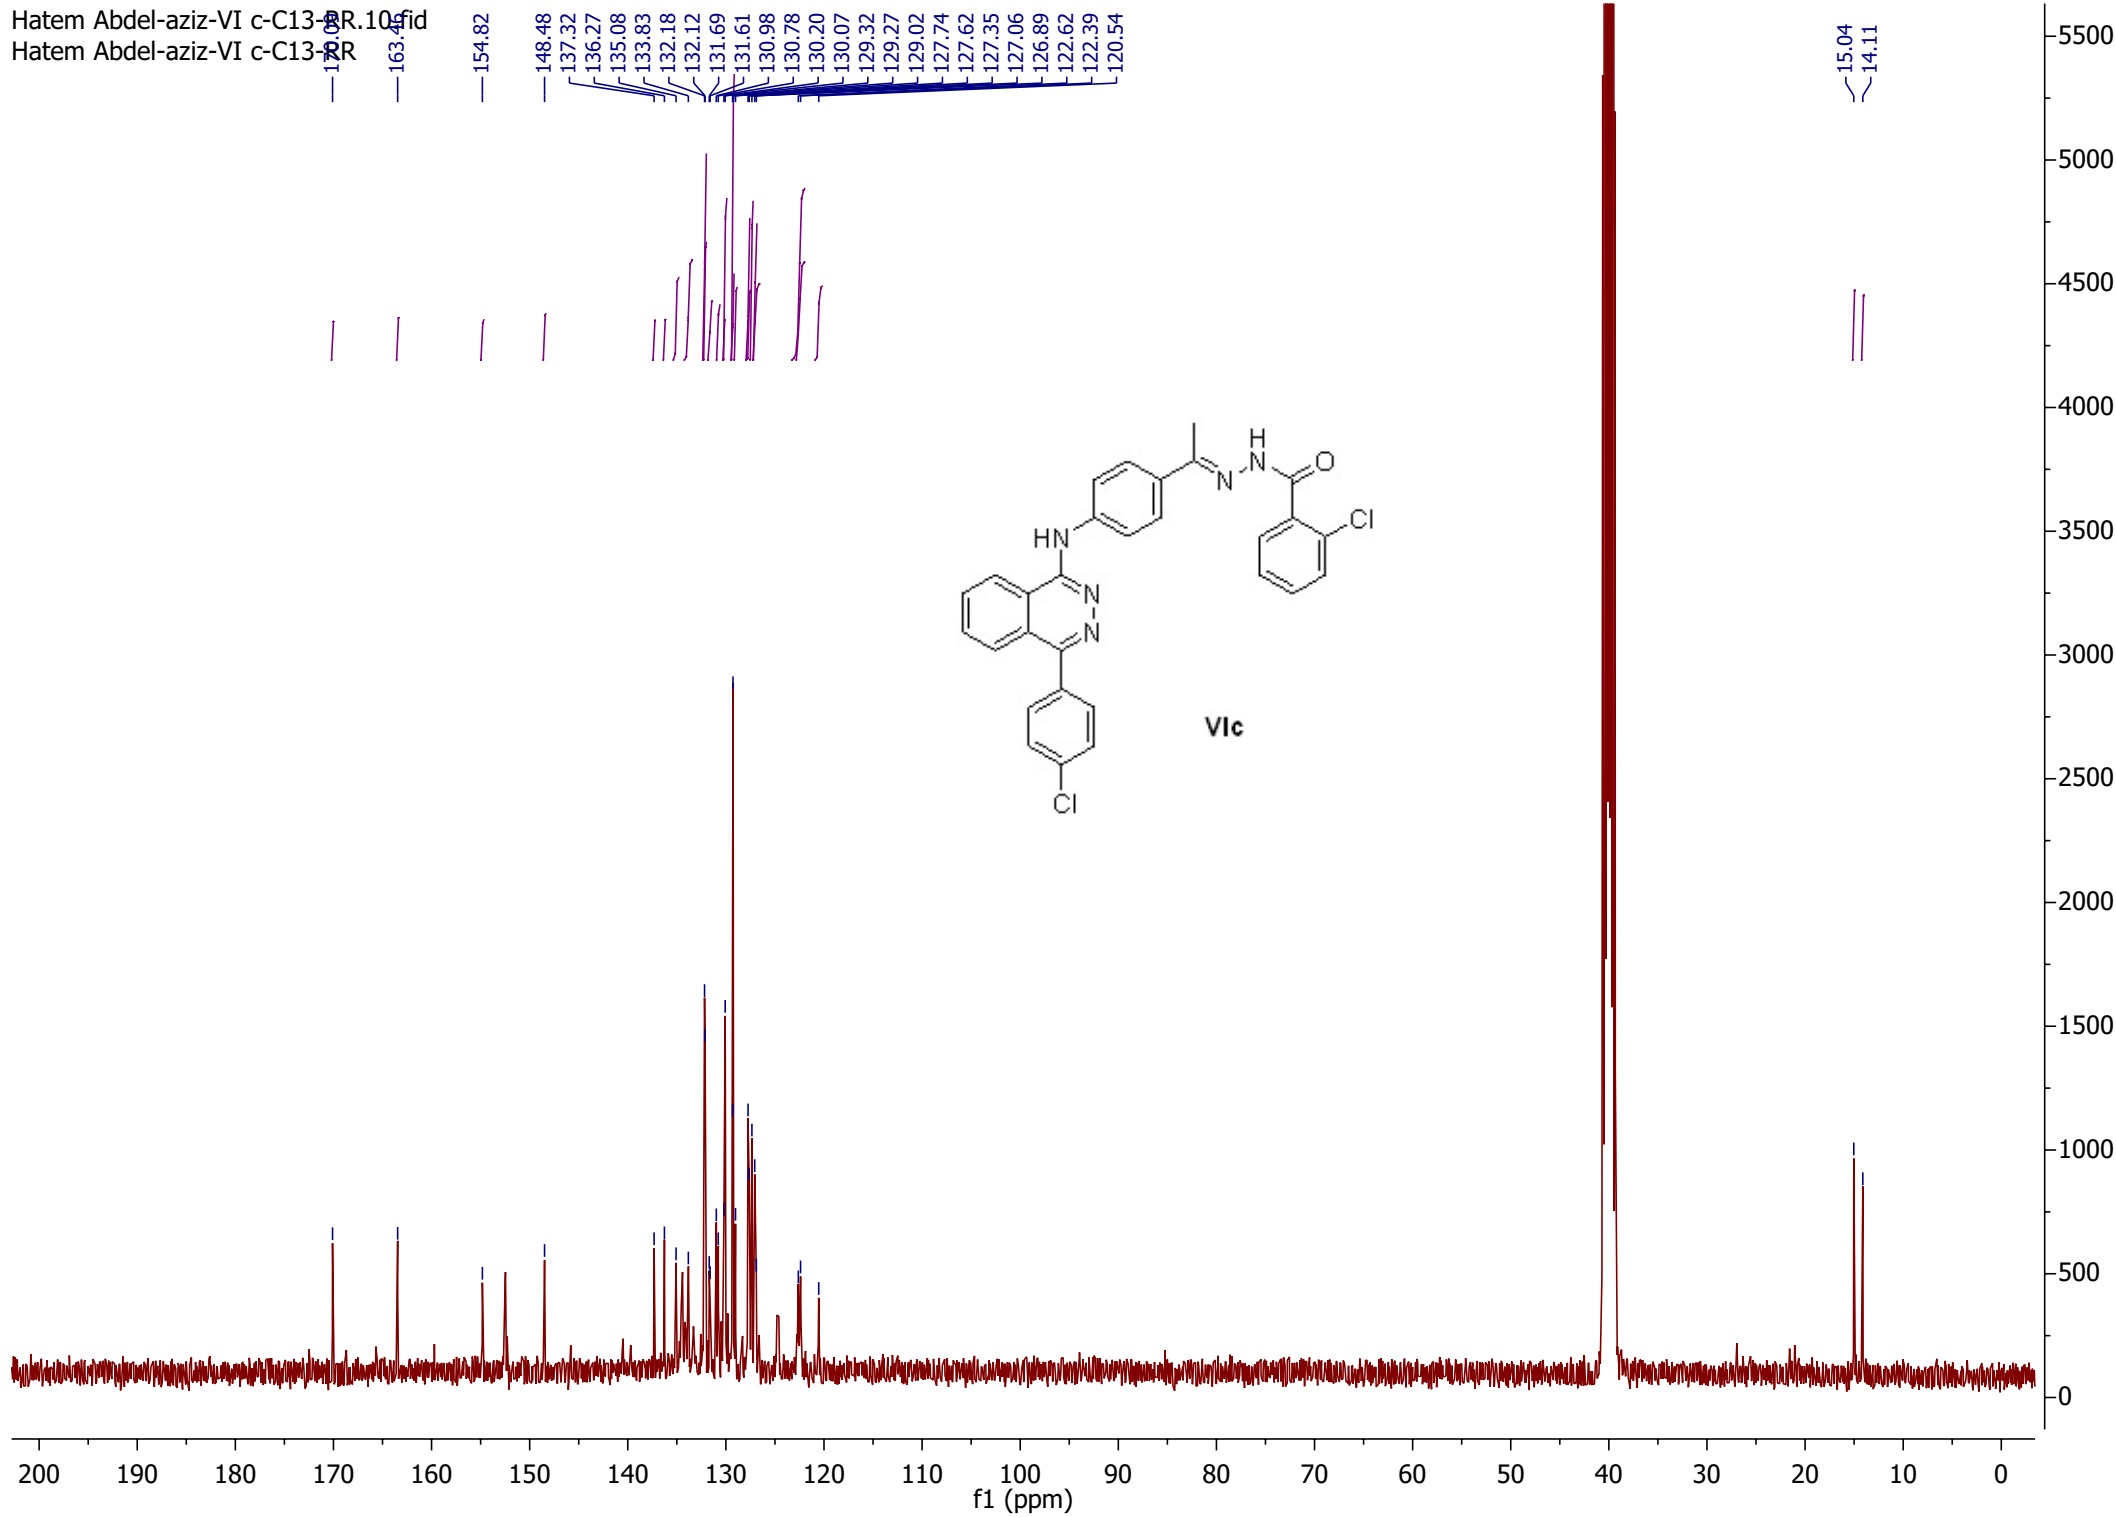

Hatem Abdel-aziz-VI d-C13-RR.10.f  
Hatem Abdel-aziz-VI d-C13-RR

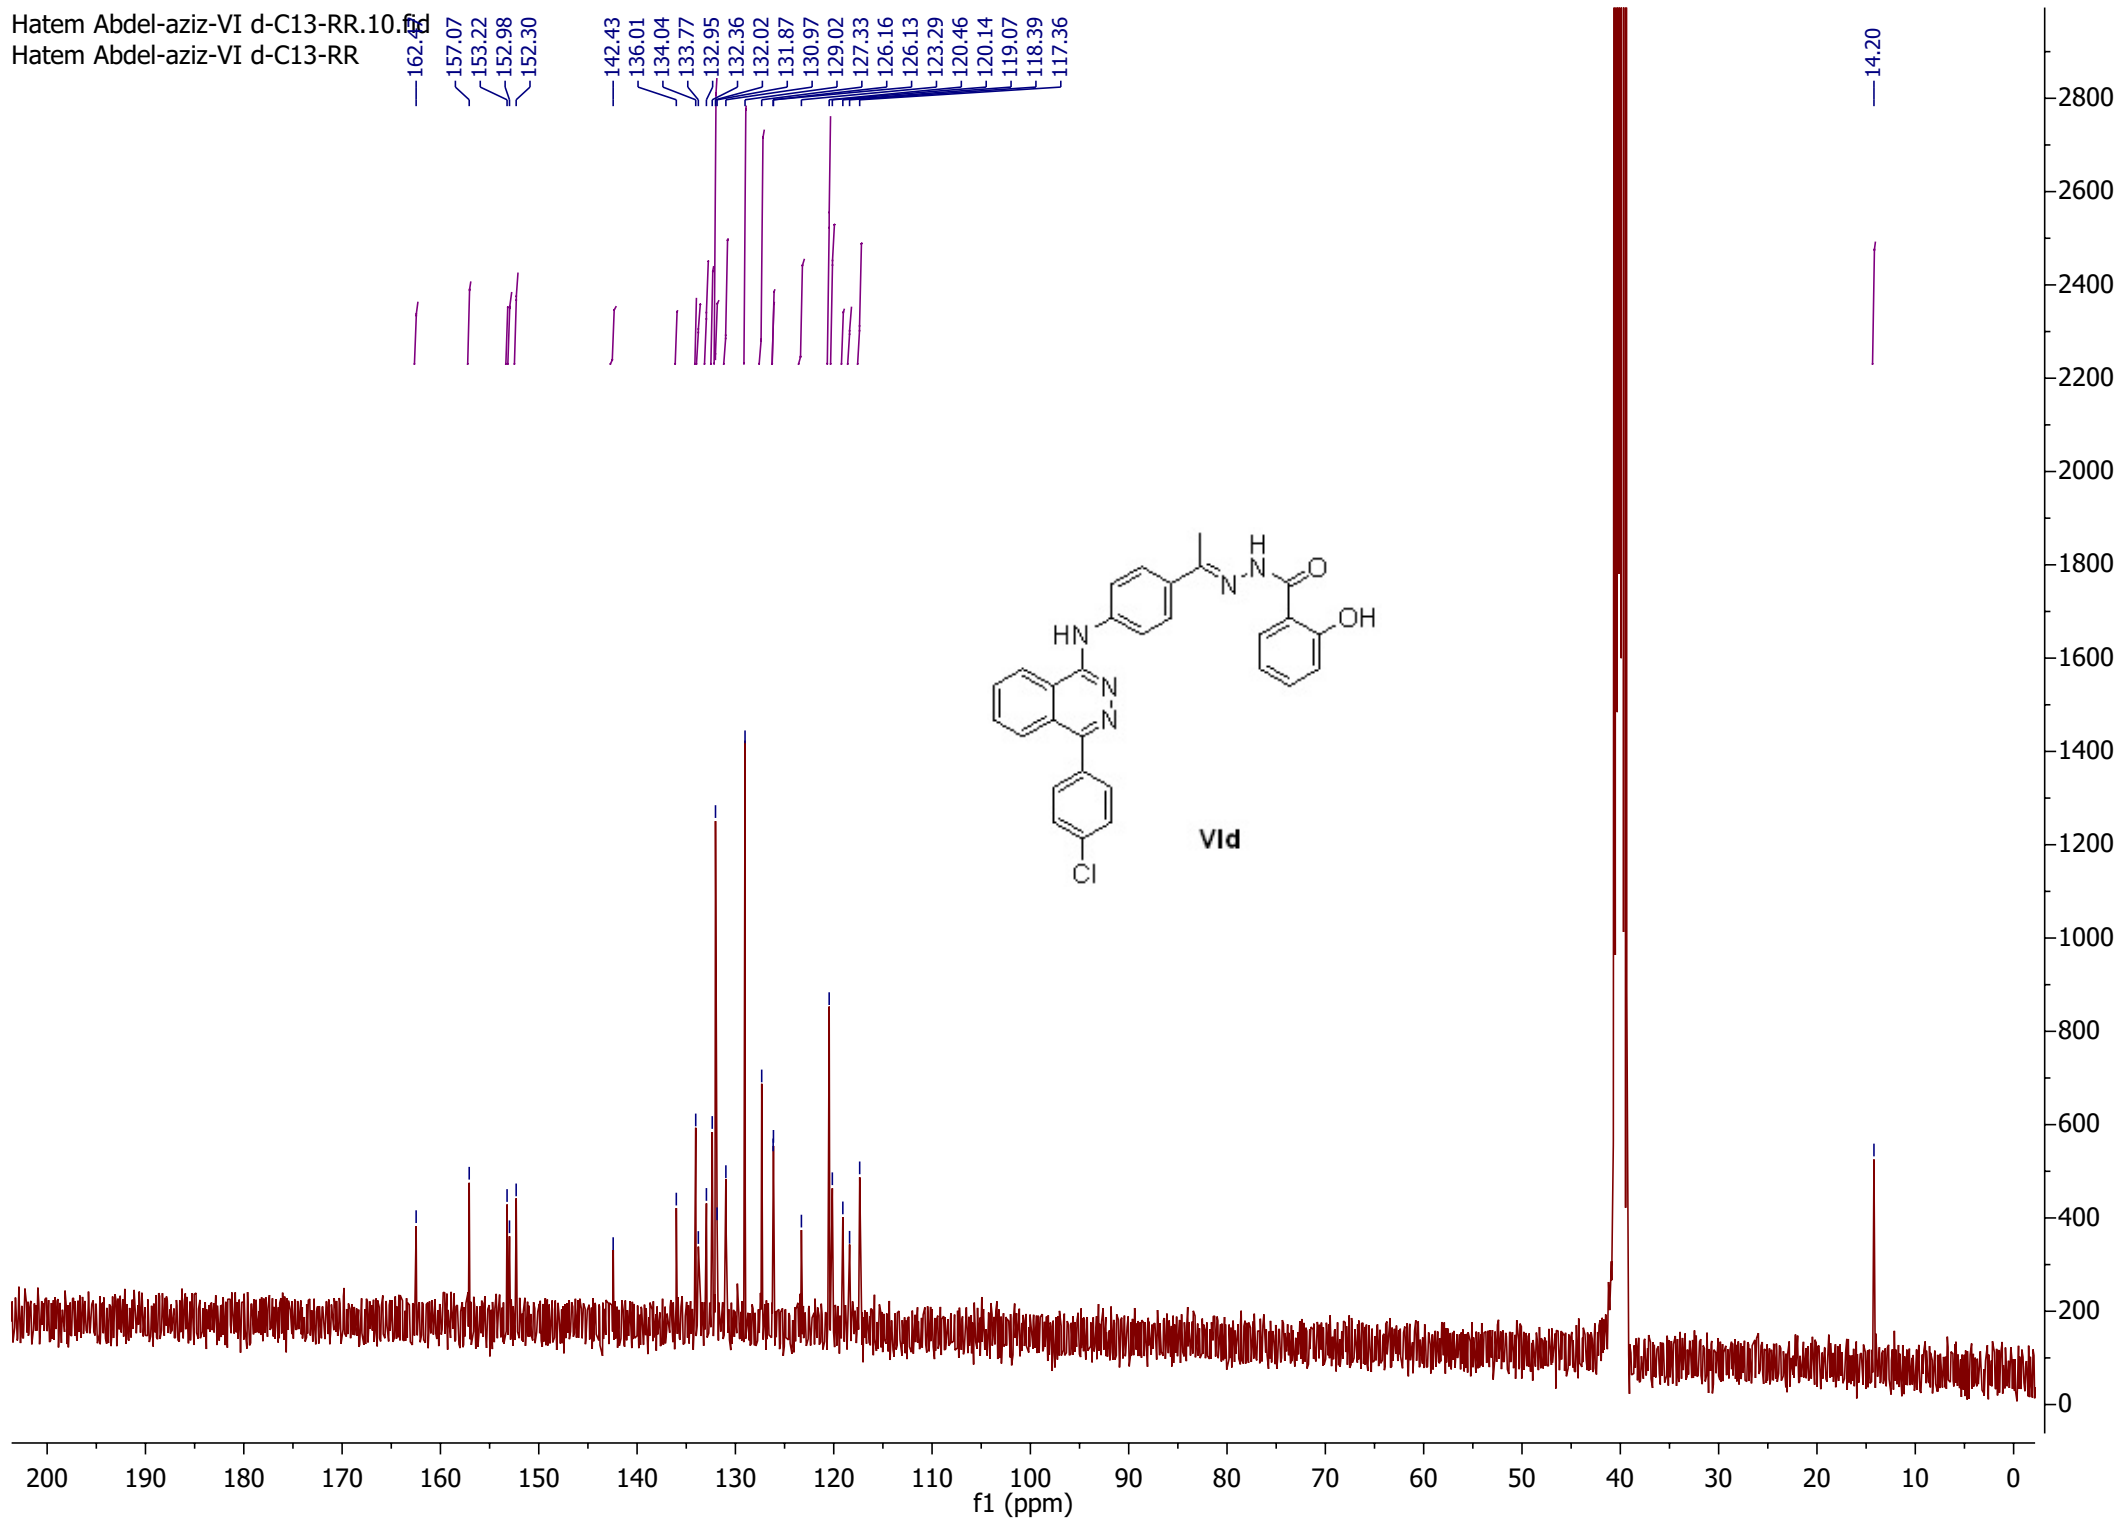

Hatery Abdel-aziz-VI e-C13-RR.19.fid  
Hatery Abdel-aziz-VI e-C13-RR

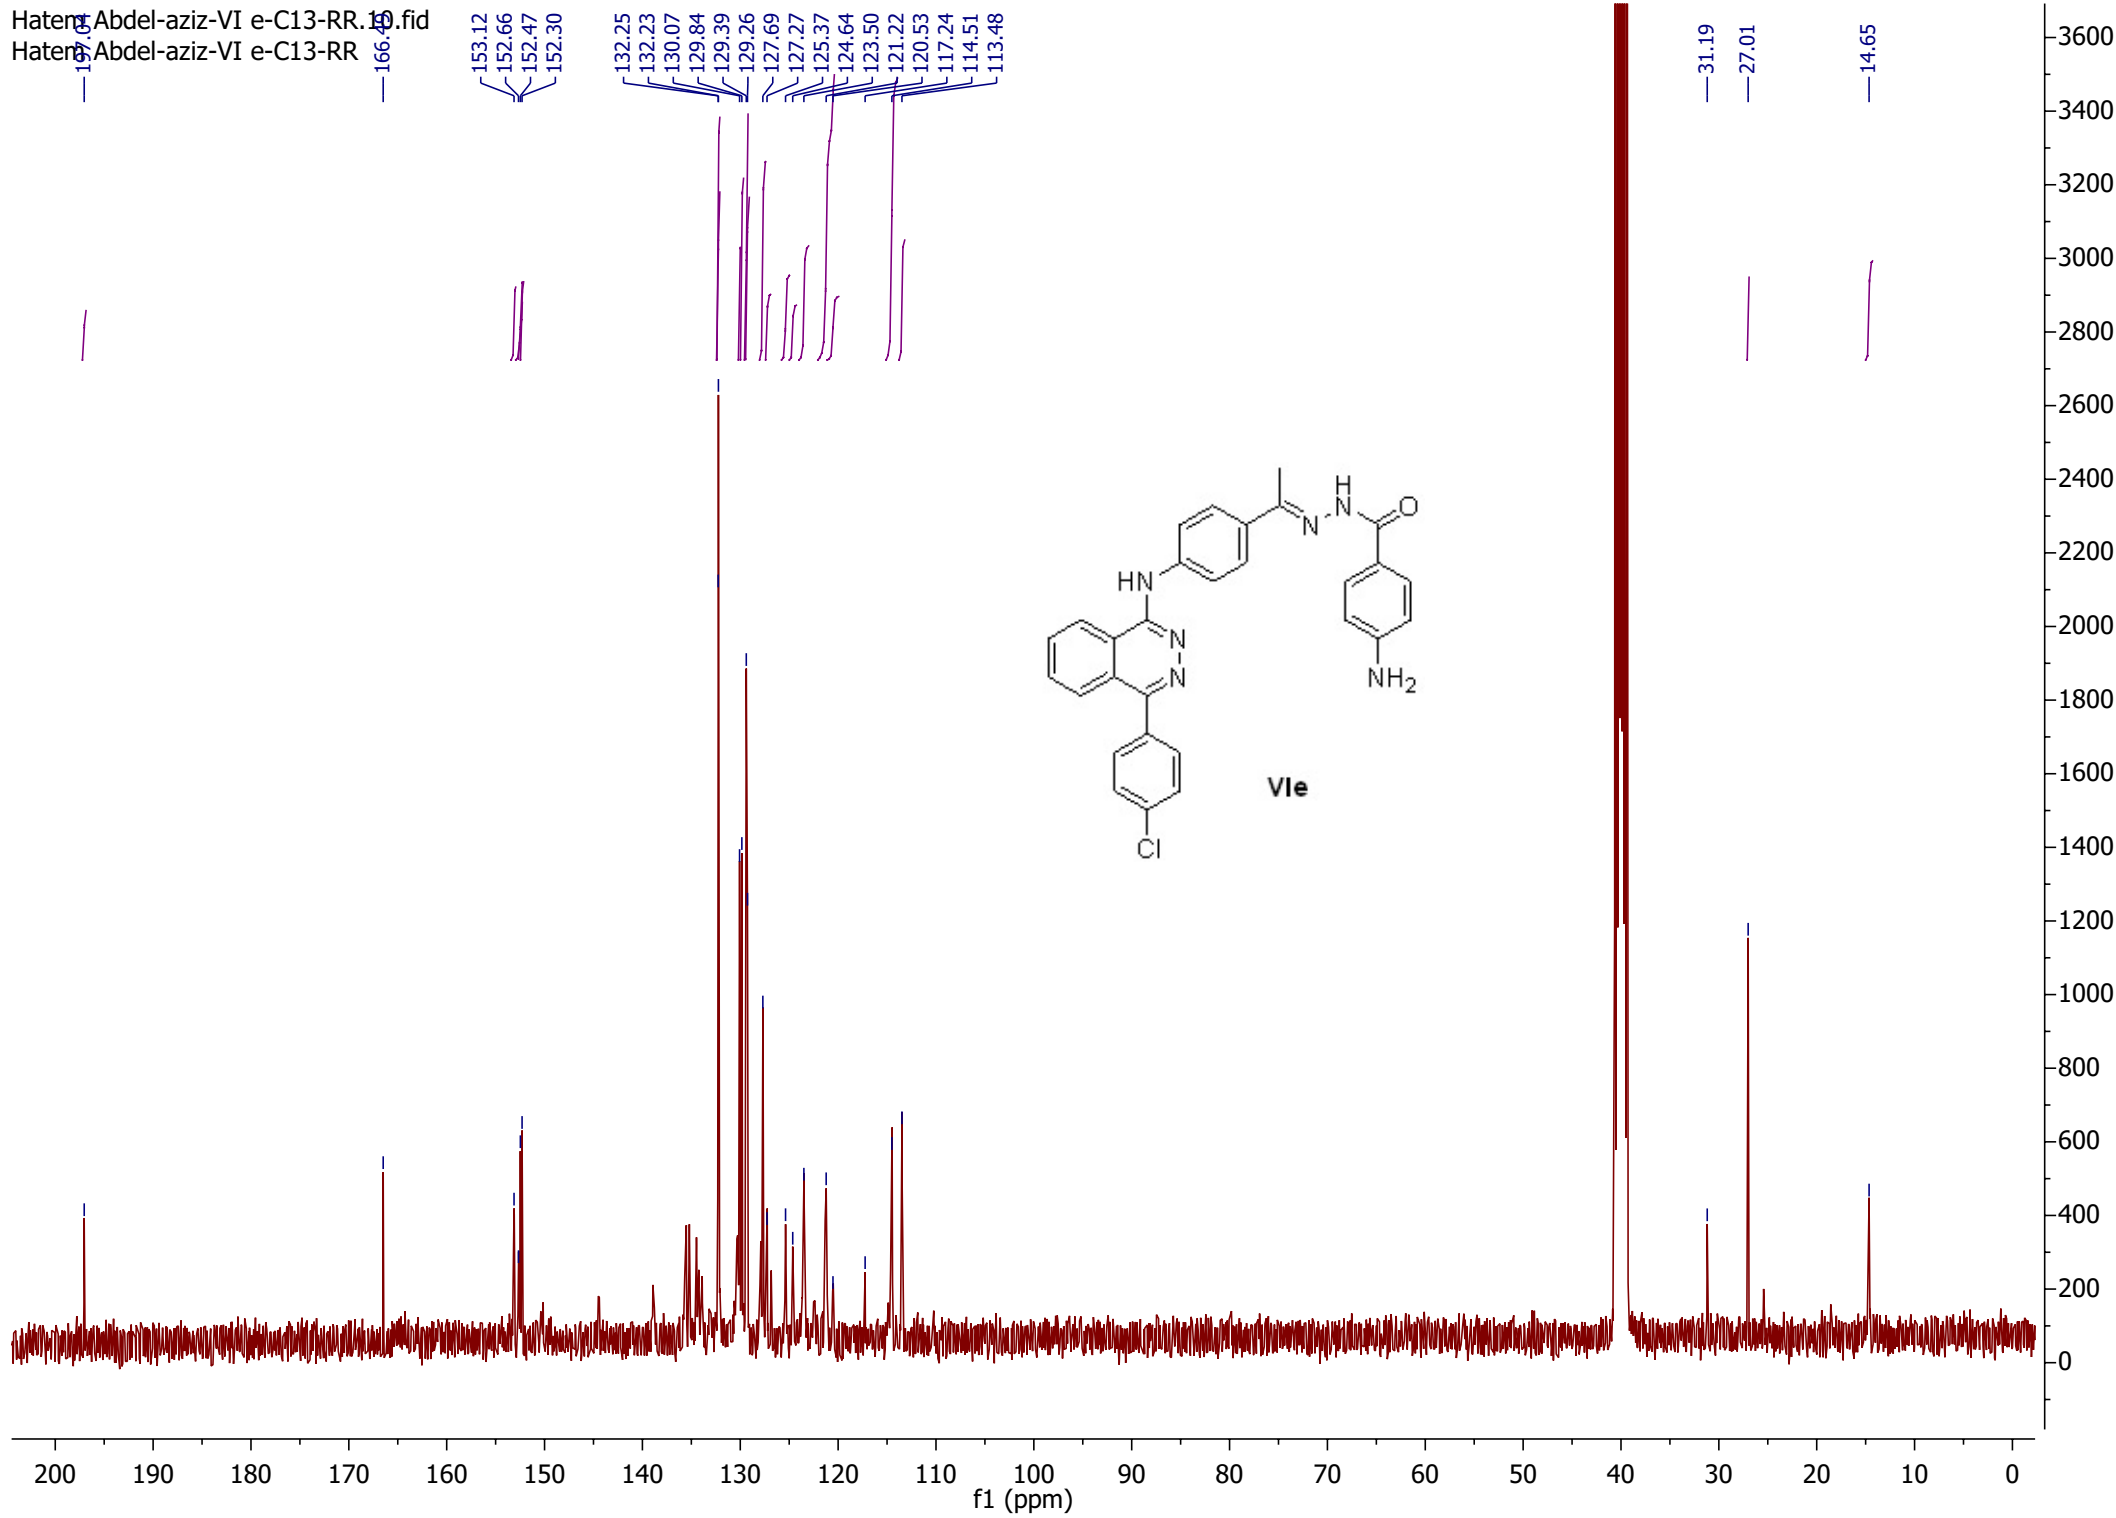

Hatem-Abdel-aziz-VI f-C13-RR.10.ft  
Hatem-Abdel-aziz-VI f-C13-RR

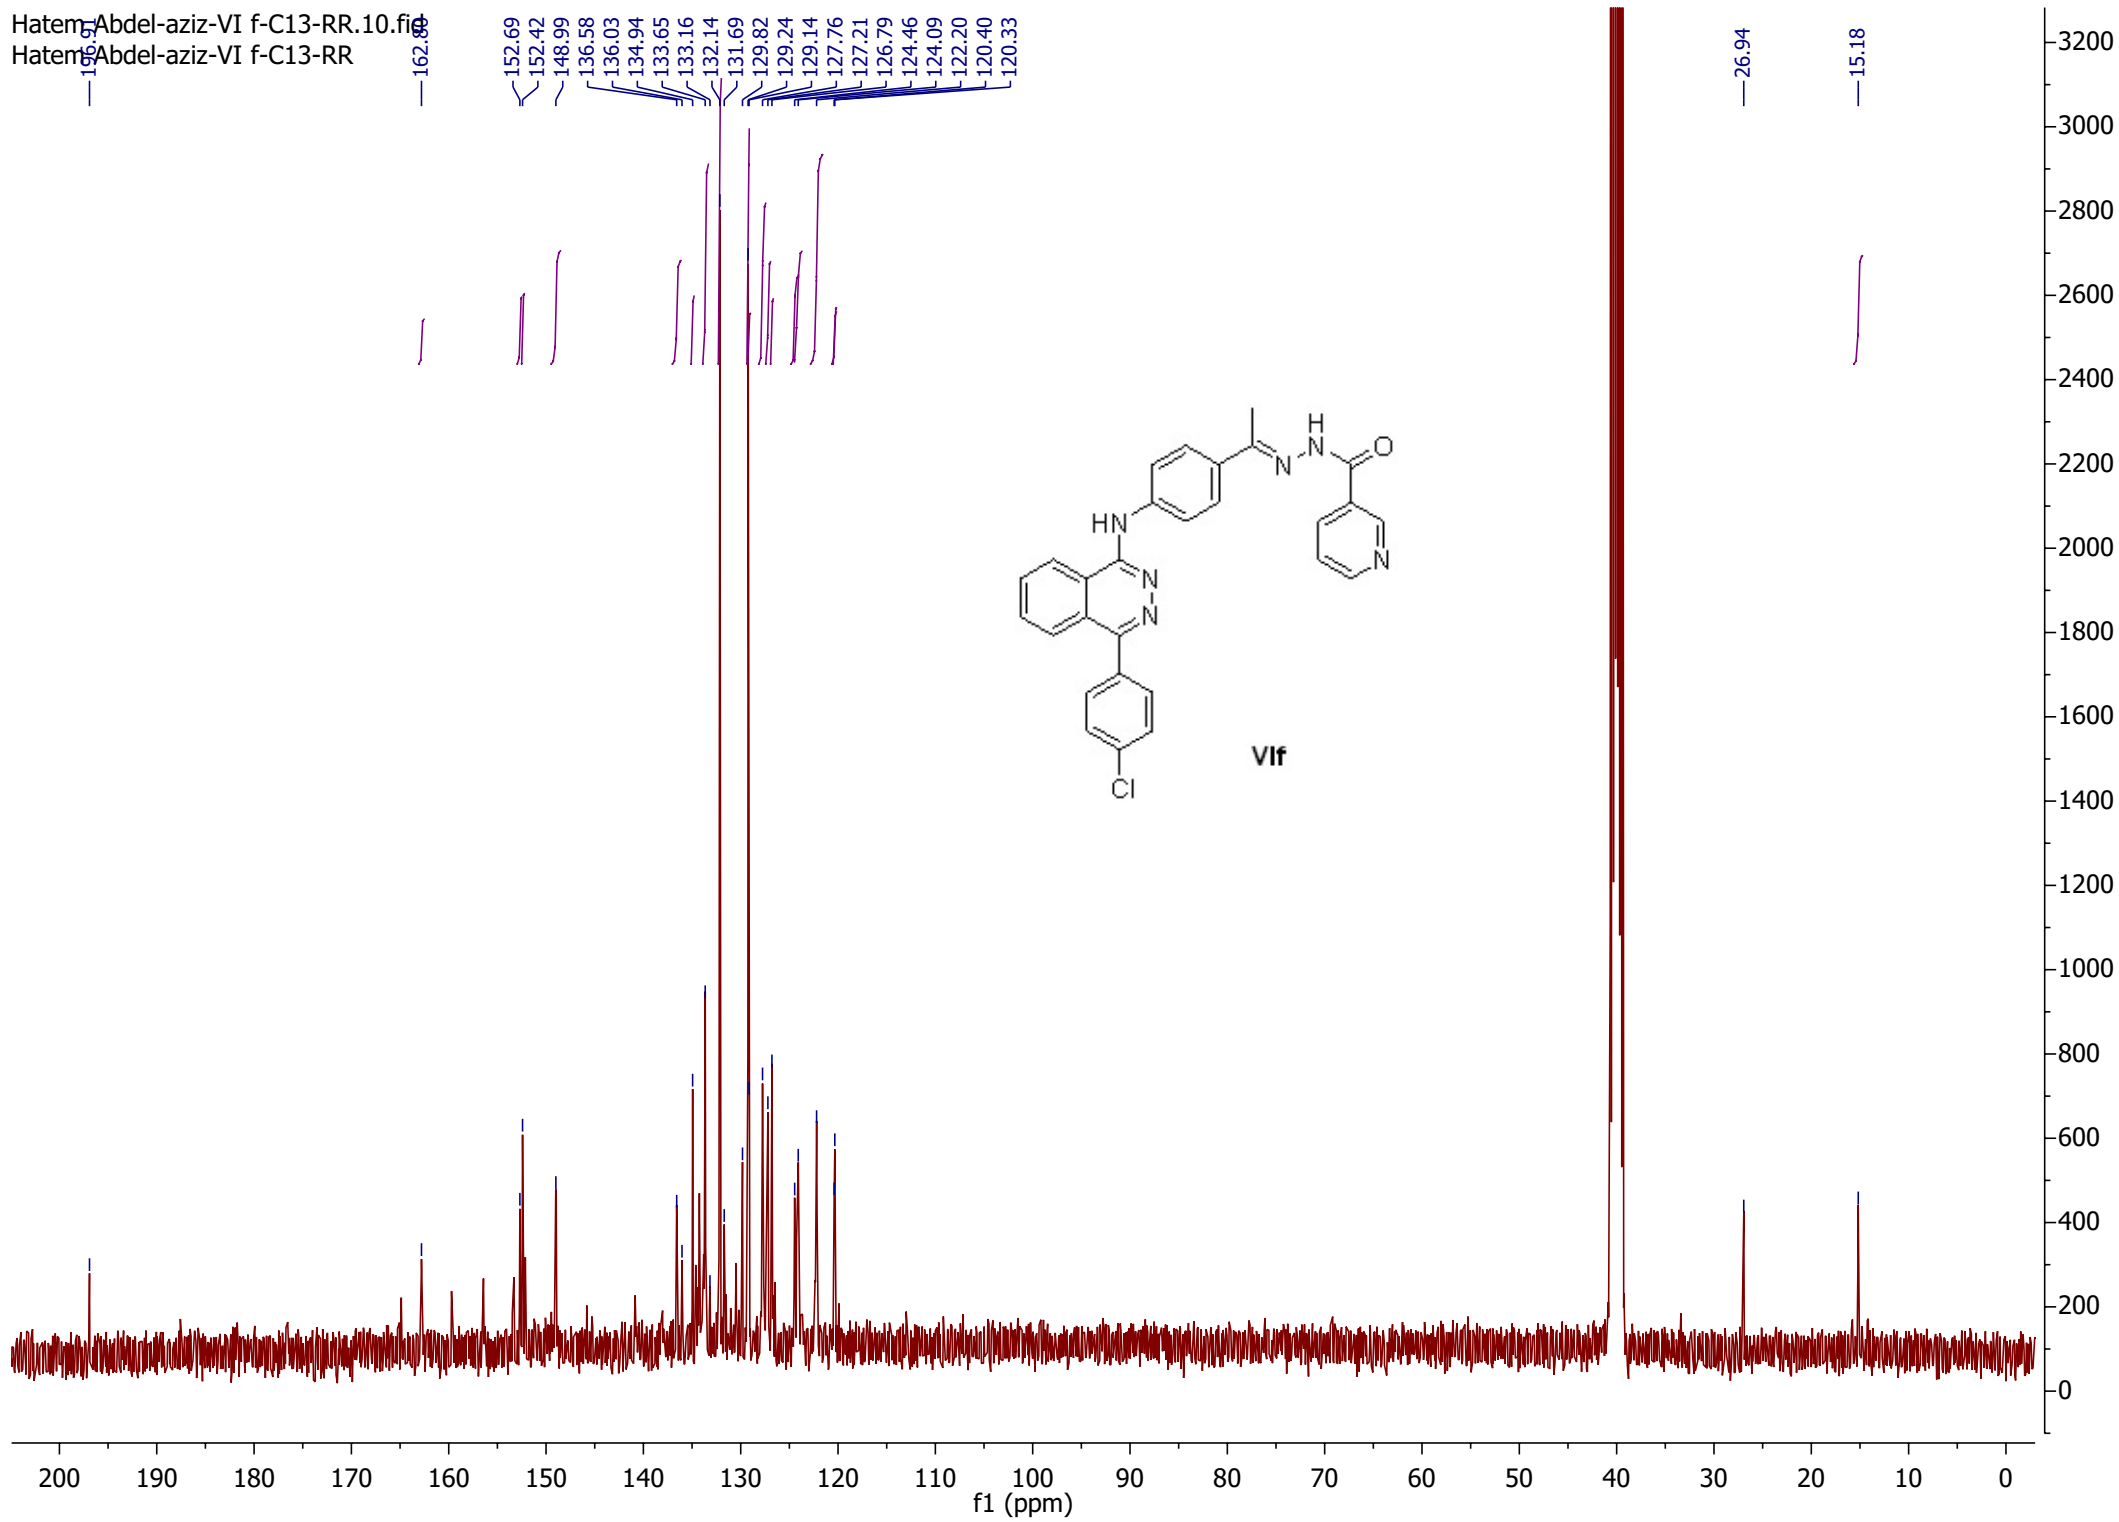

Hatem Abdel-aziz-VI g-C13-RR.10.fid  
Hatem Abdel-aziz-VI g-C13-RR

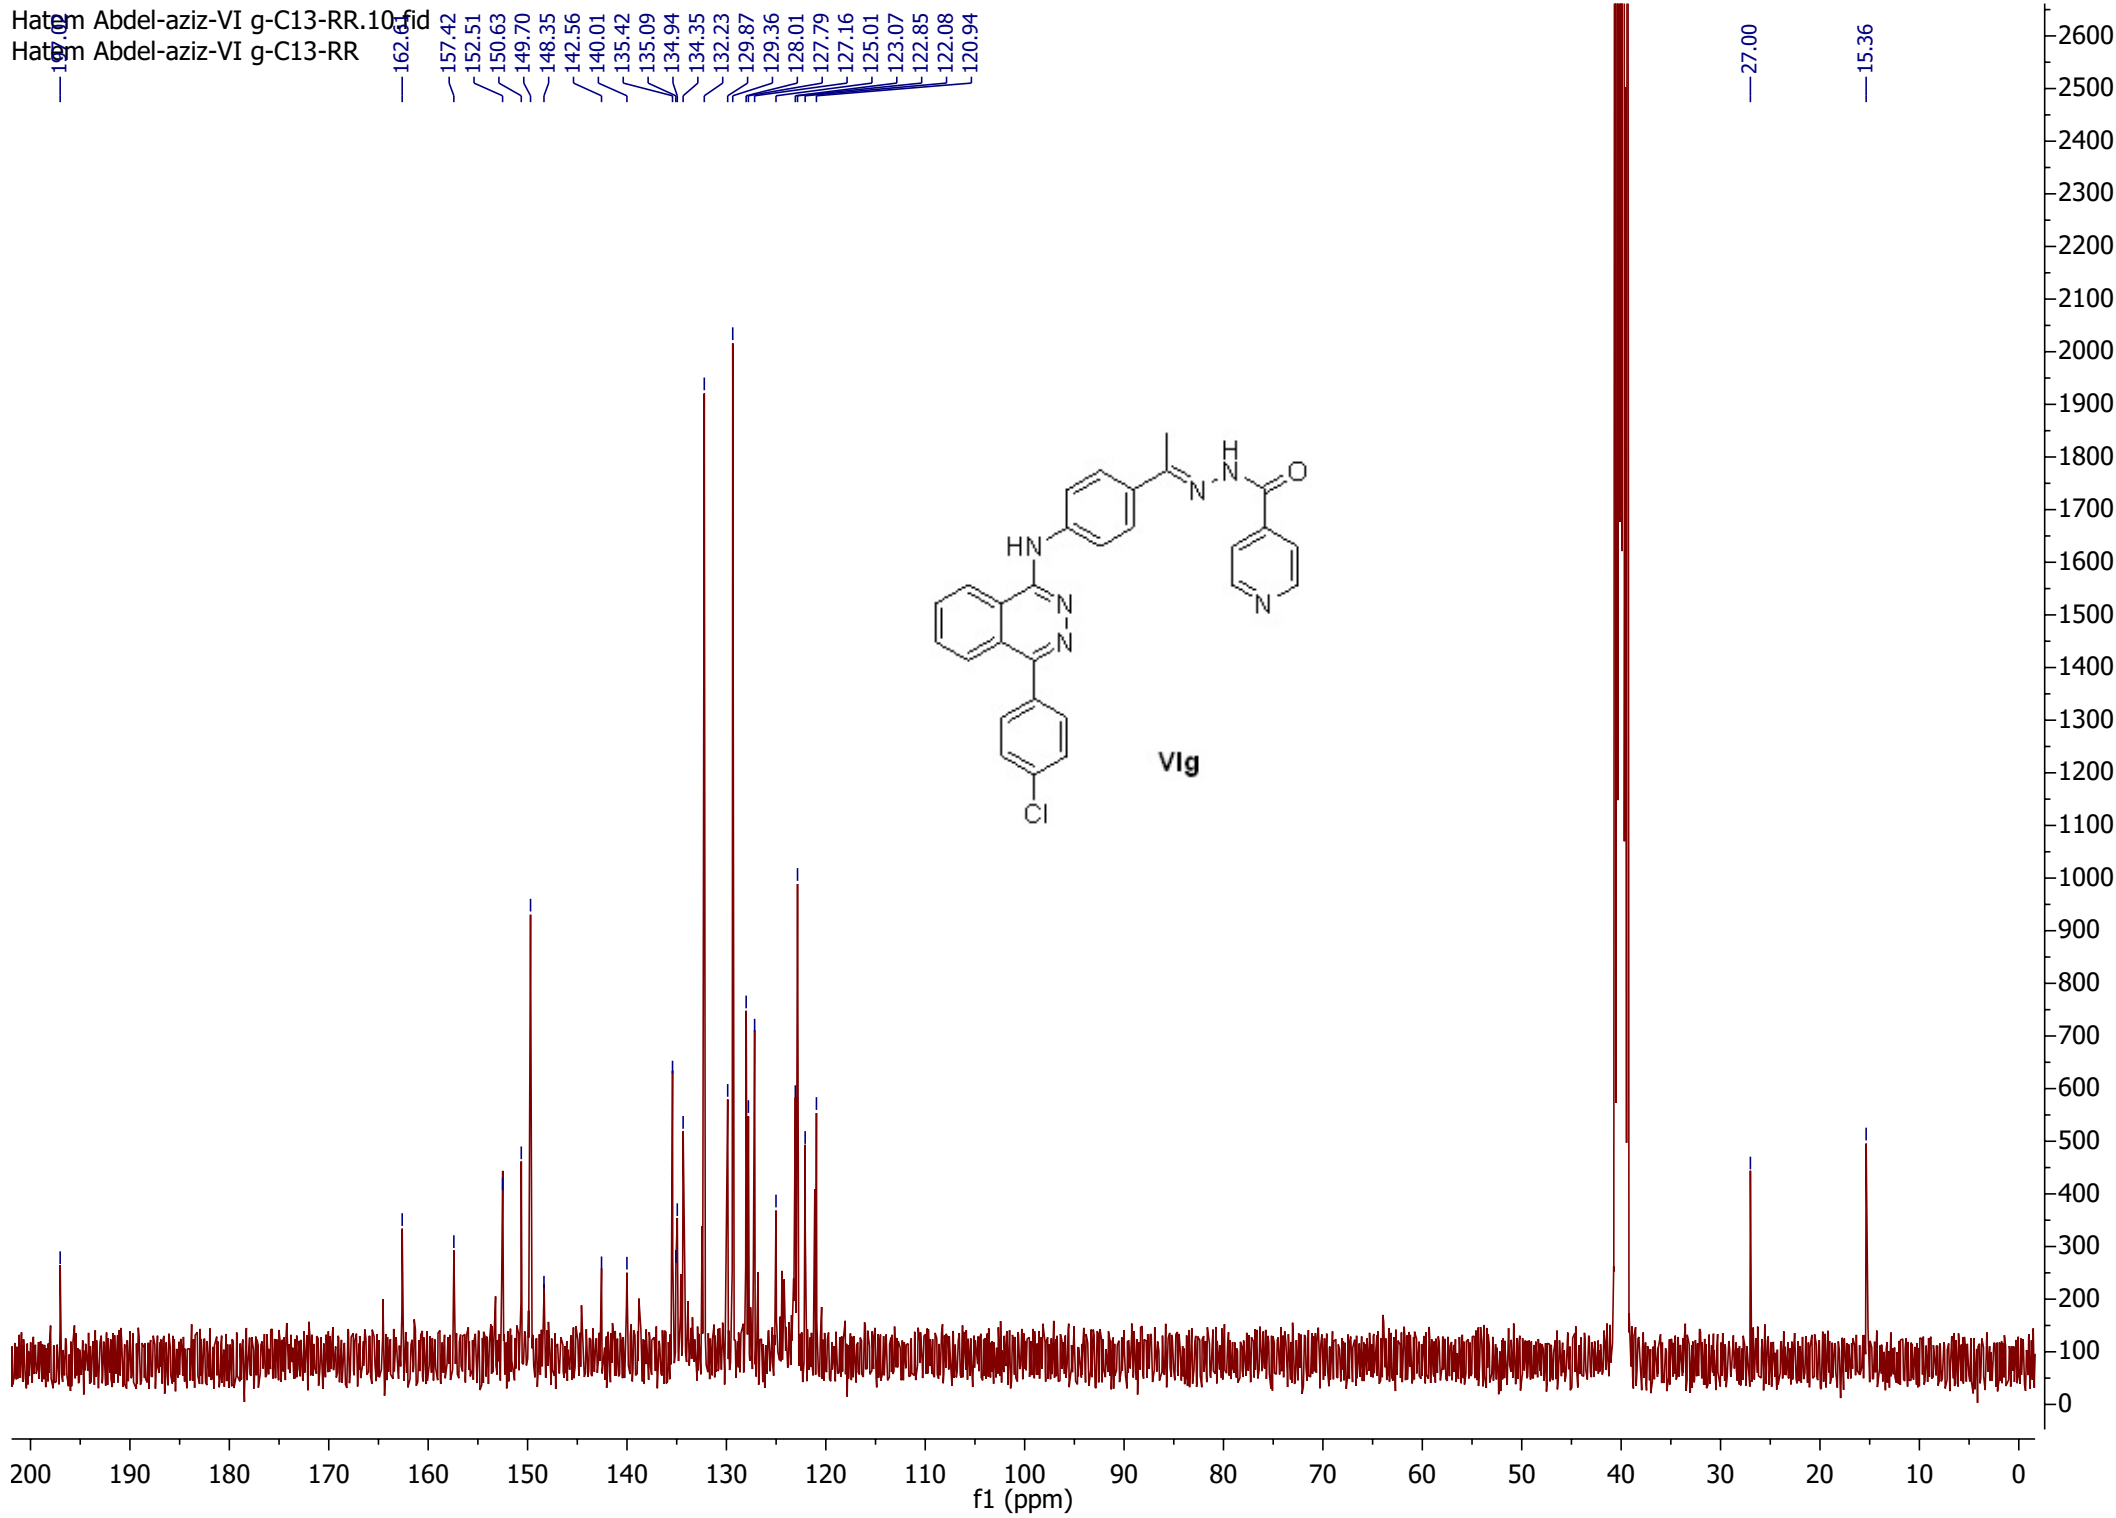



Hatem Abdel-aziz-VII a-C13-RR.10.fid  
Hatem Abdel-aziz-VII a-C13-RR

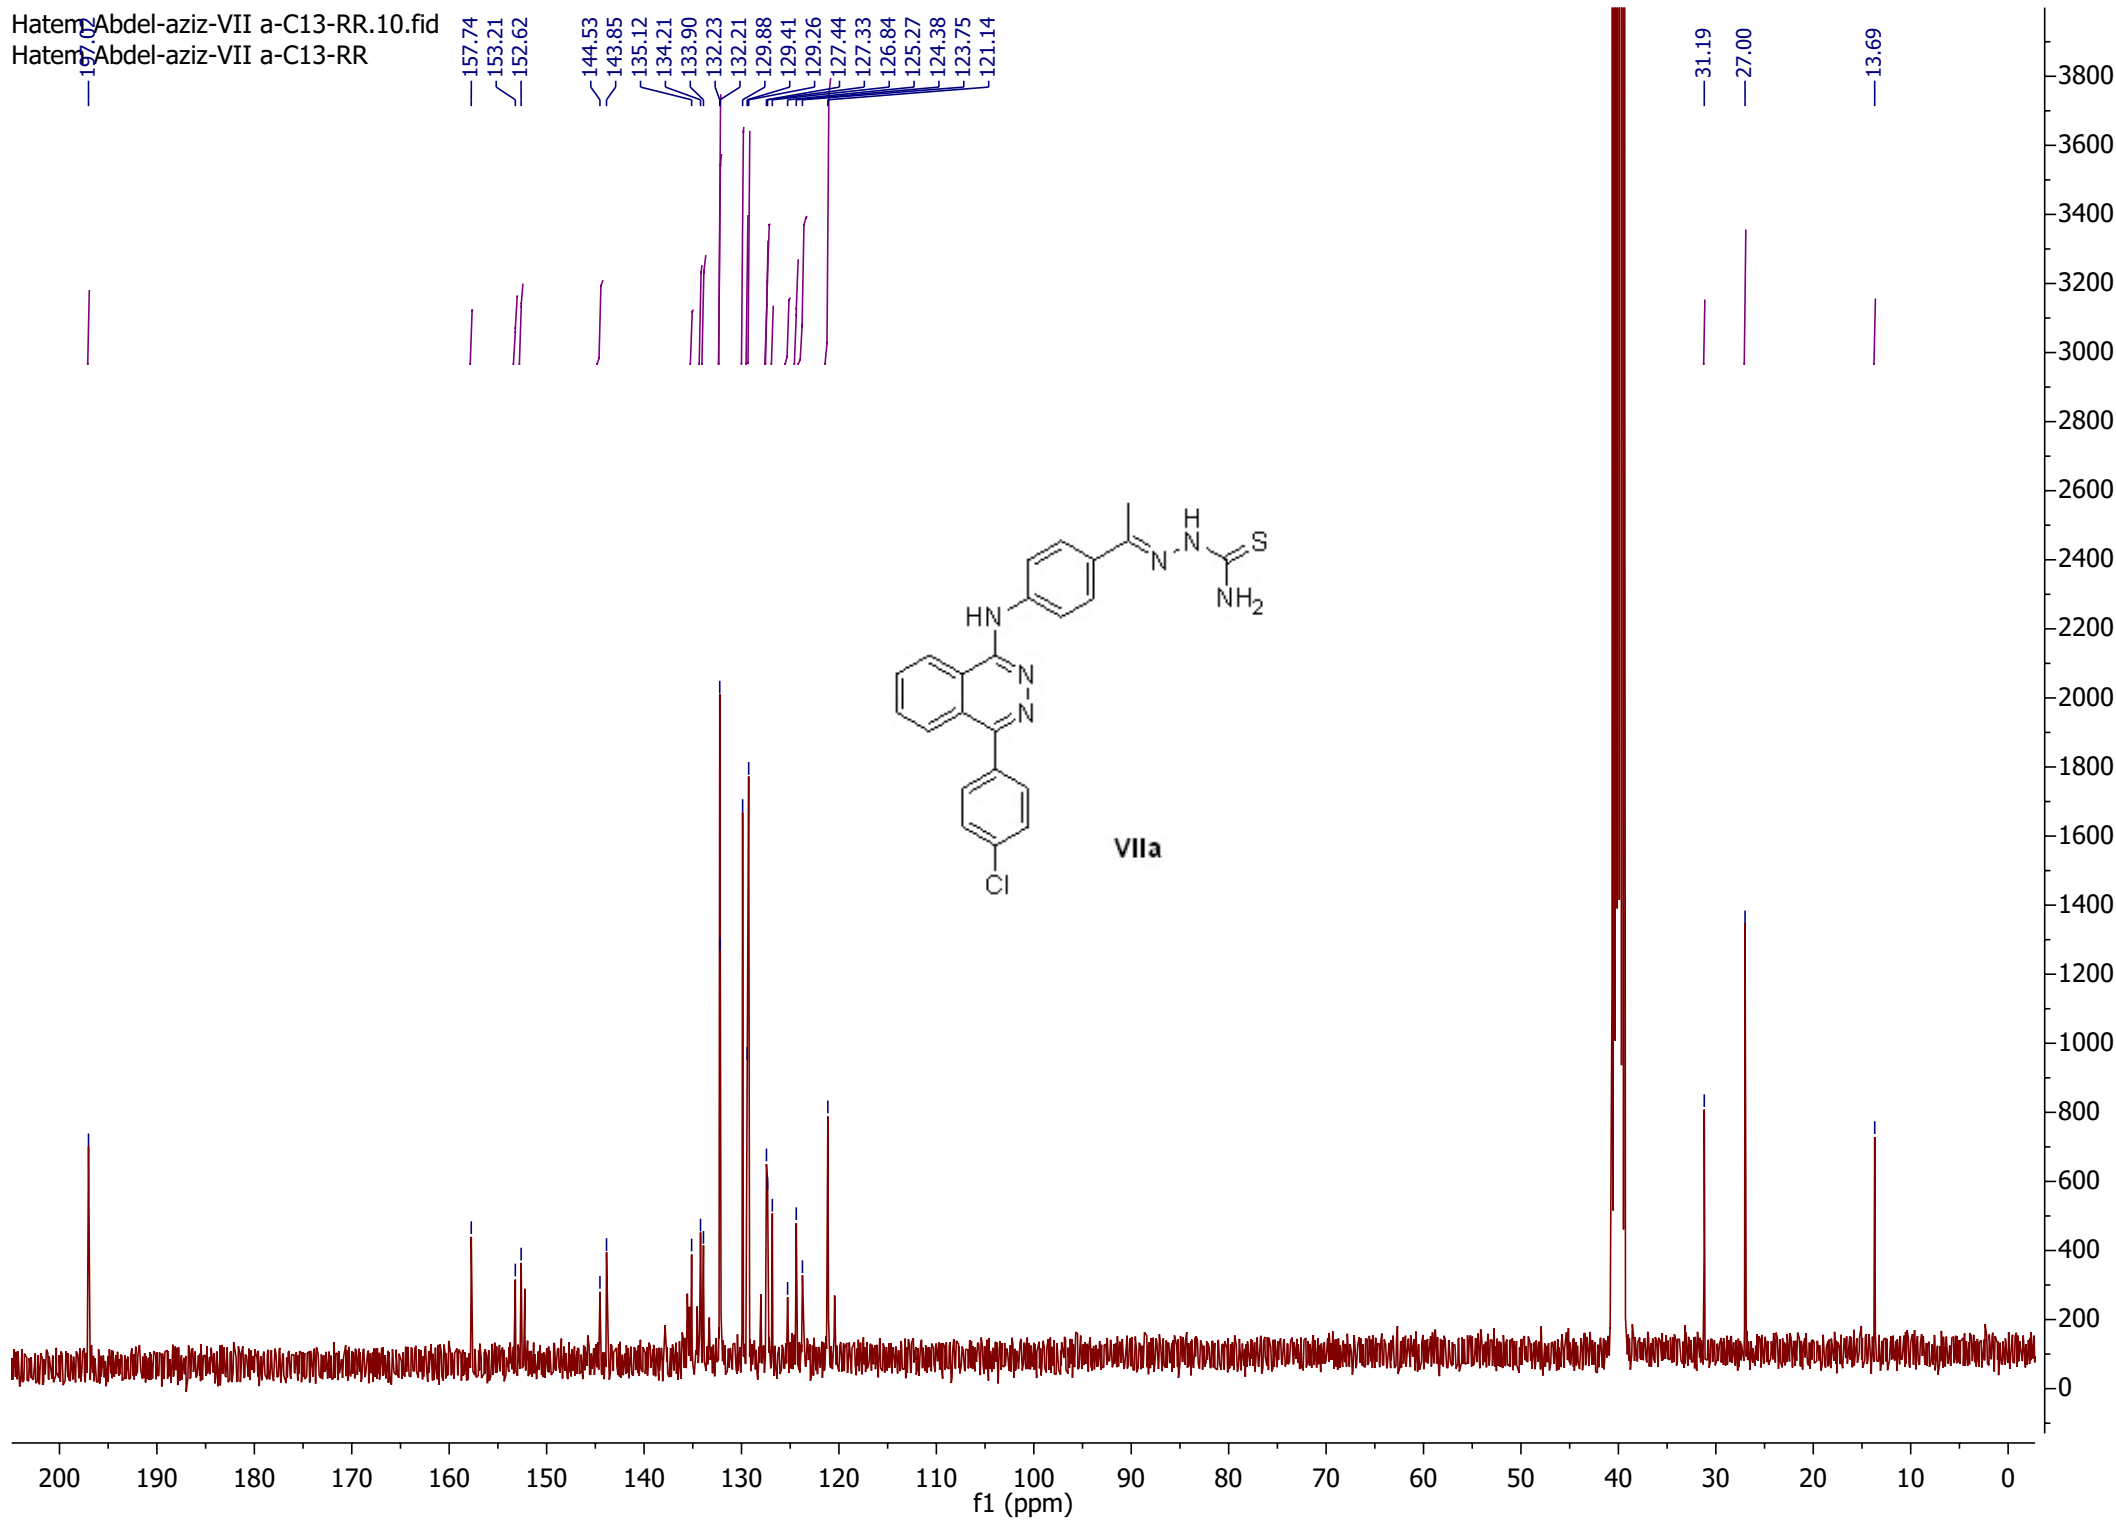

Supplement: d4ra03459g2.pdf [file d4ra03459g2.pdf]
