# Supplementary material for: Exploration of the VEGFR-2 inhibition activity of phthalazine derivatives: design, synthesis, cytotoxicity, ADMET, molecular docking and dynamic simulation
Source: Royal Society of Chemistry journal article supplement (doi:10.1039/d4ra03459g), 2024-01-01

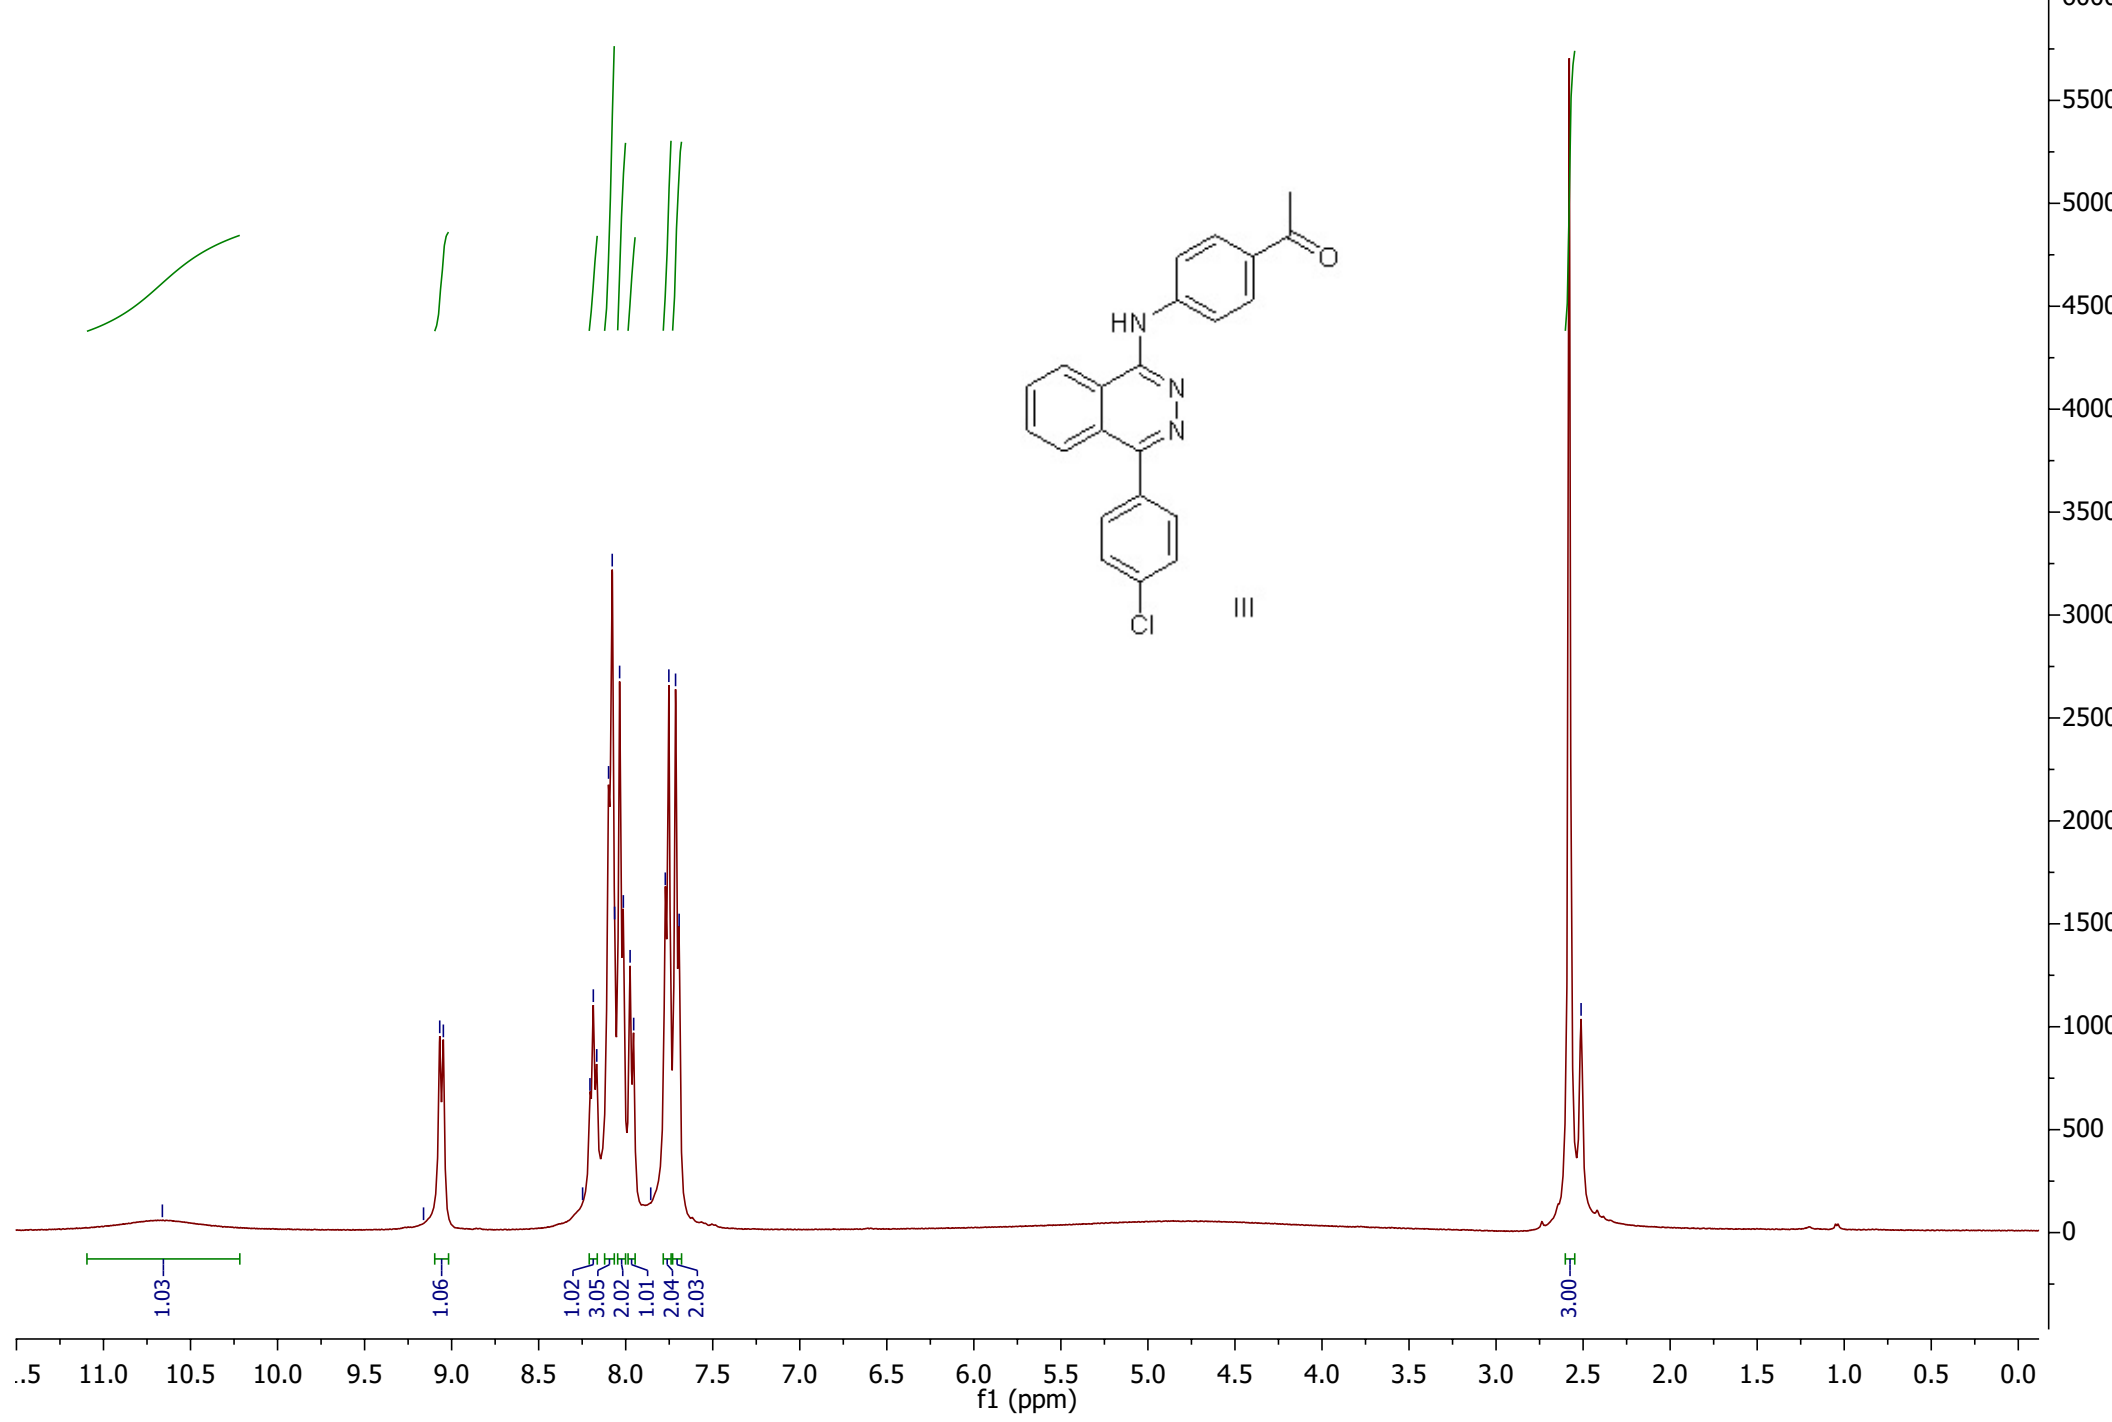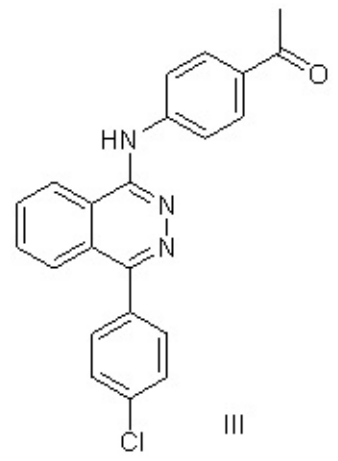

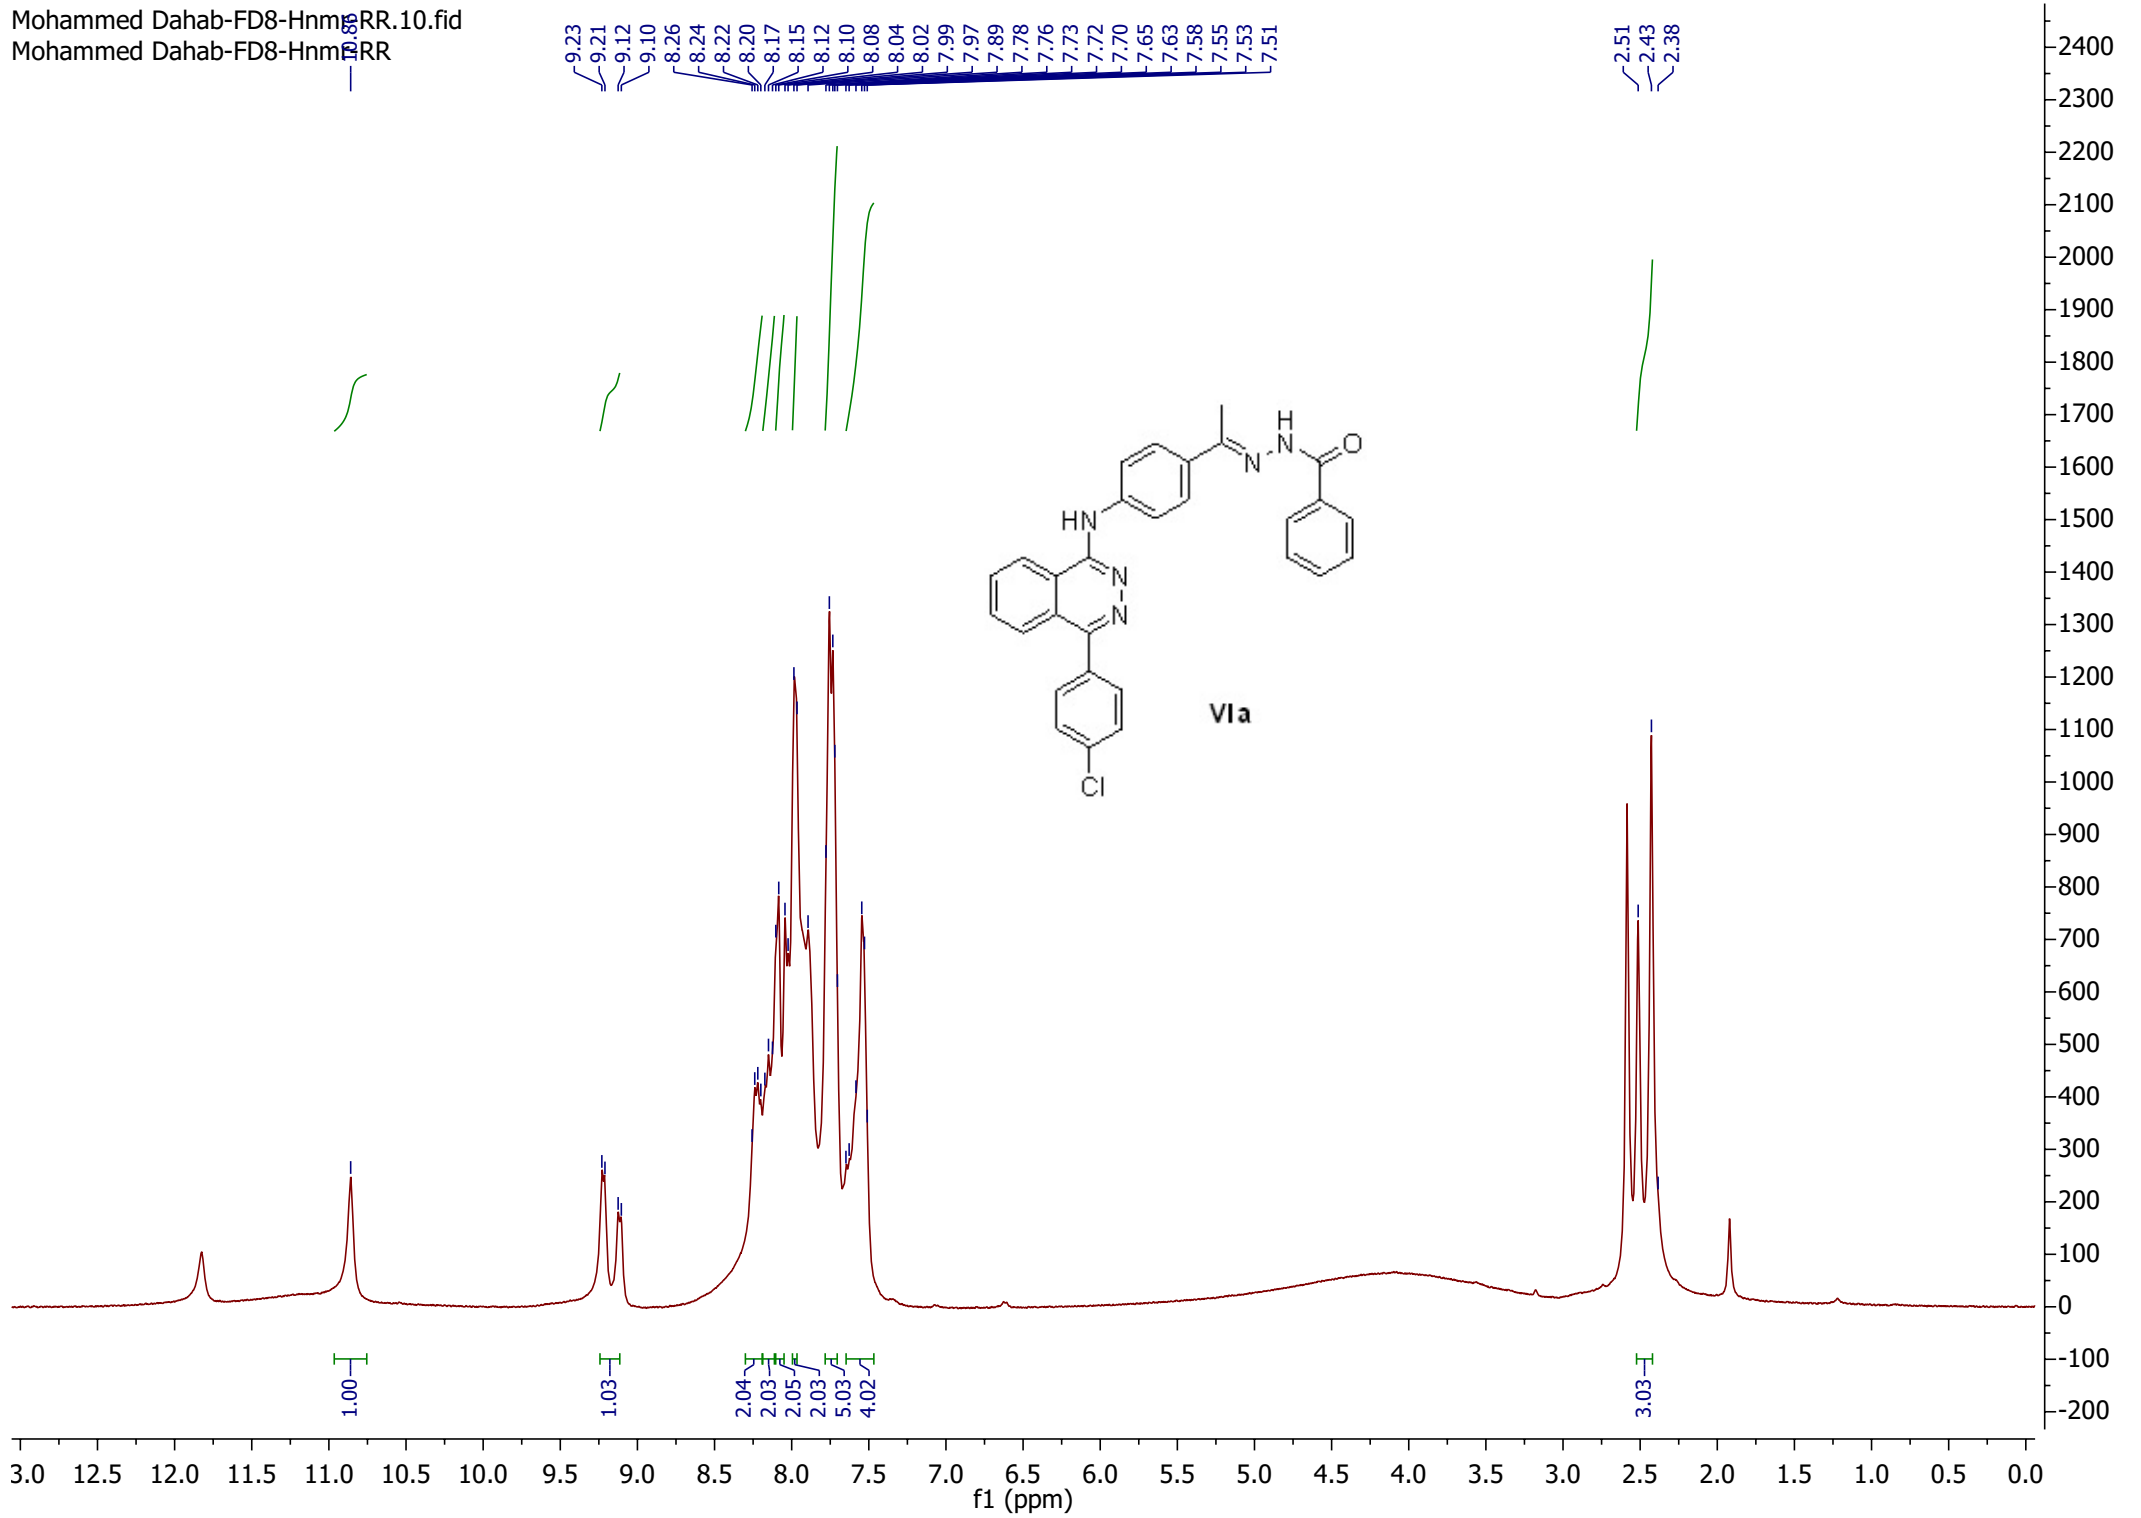

Mohammed Dahab-VIb-proton-DMSO-D<sub>10</sub>-fid  
Mohammed Dahab-VIb-proton-DMSO-D<sub>10</sub>-fid

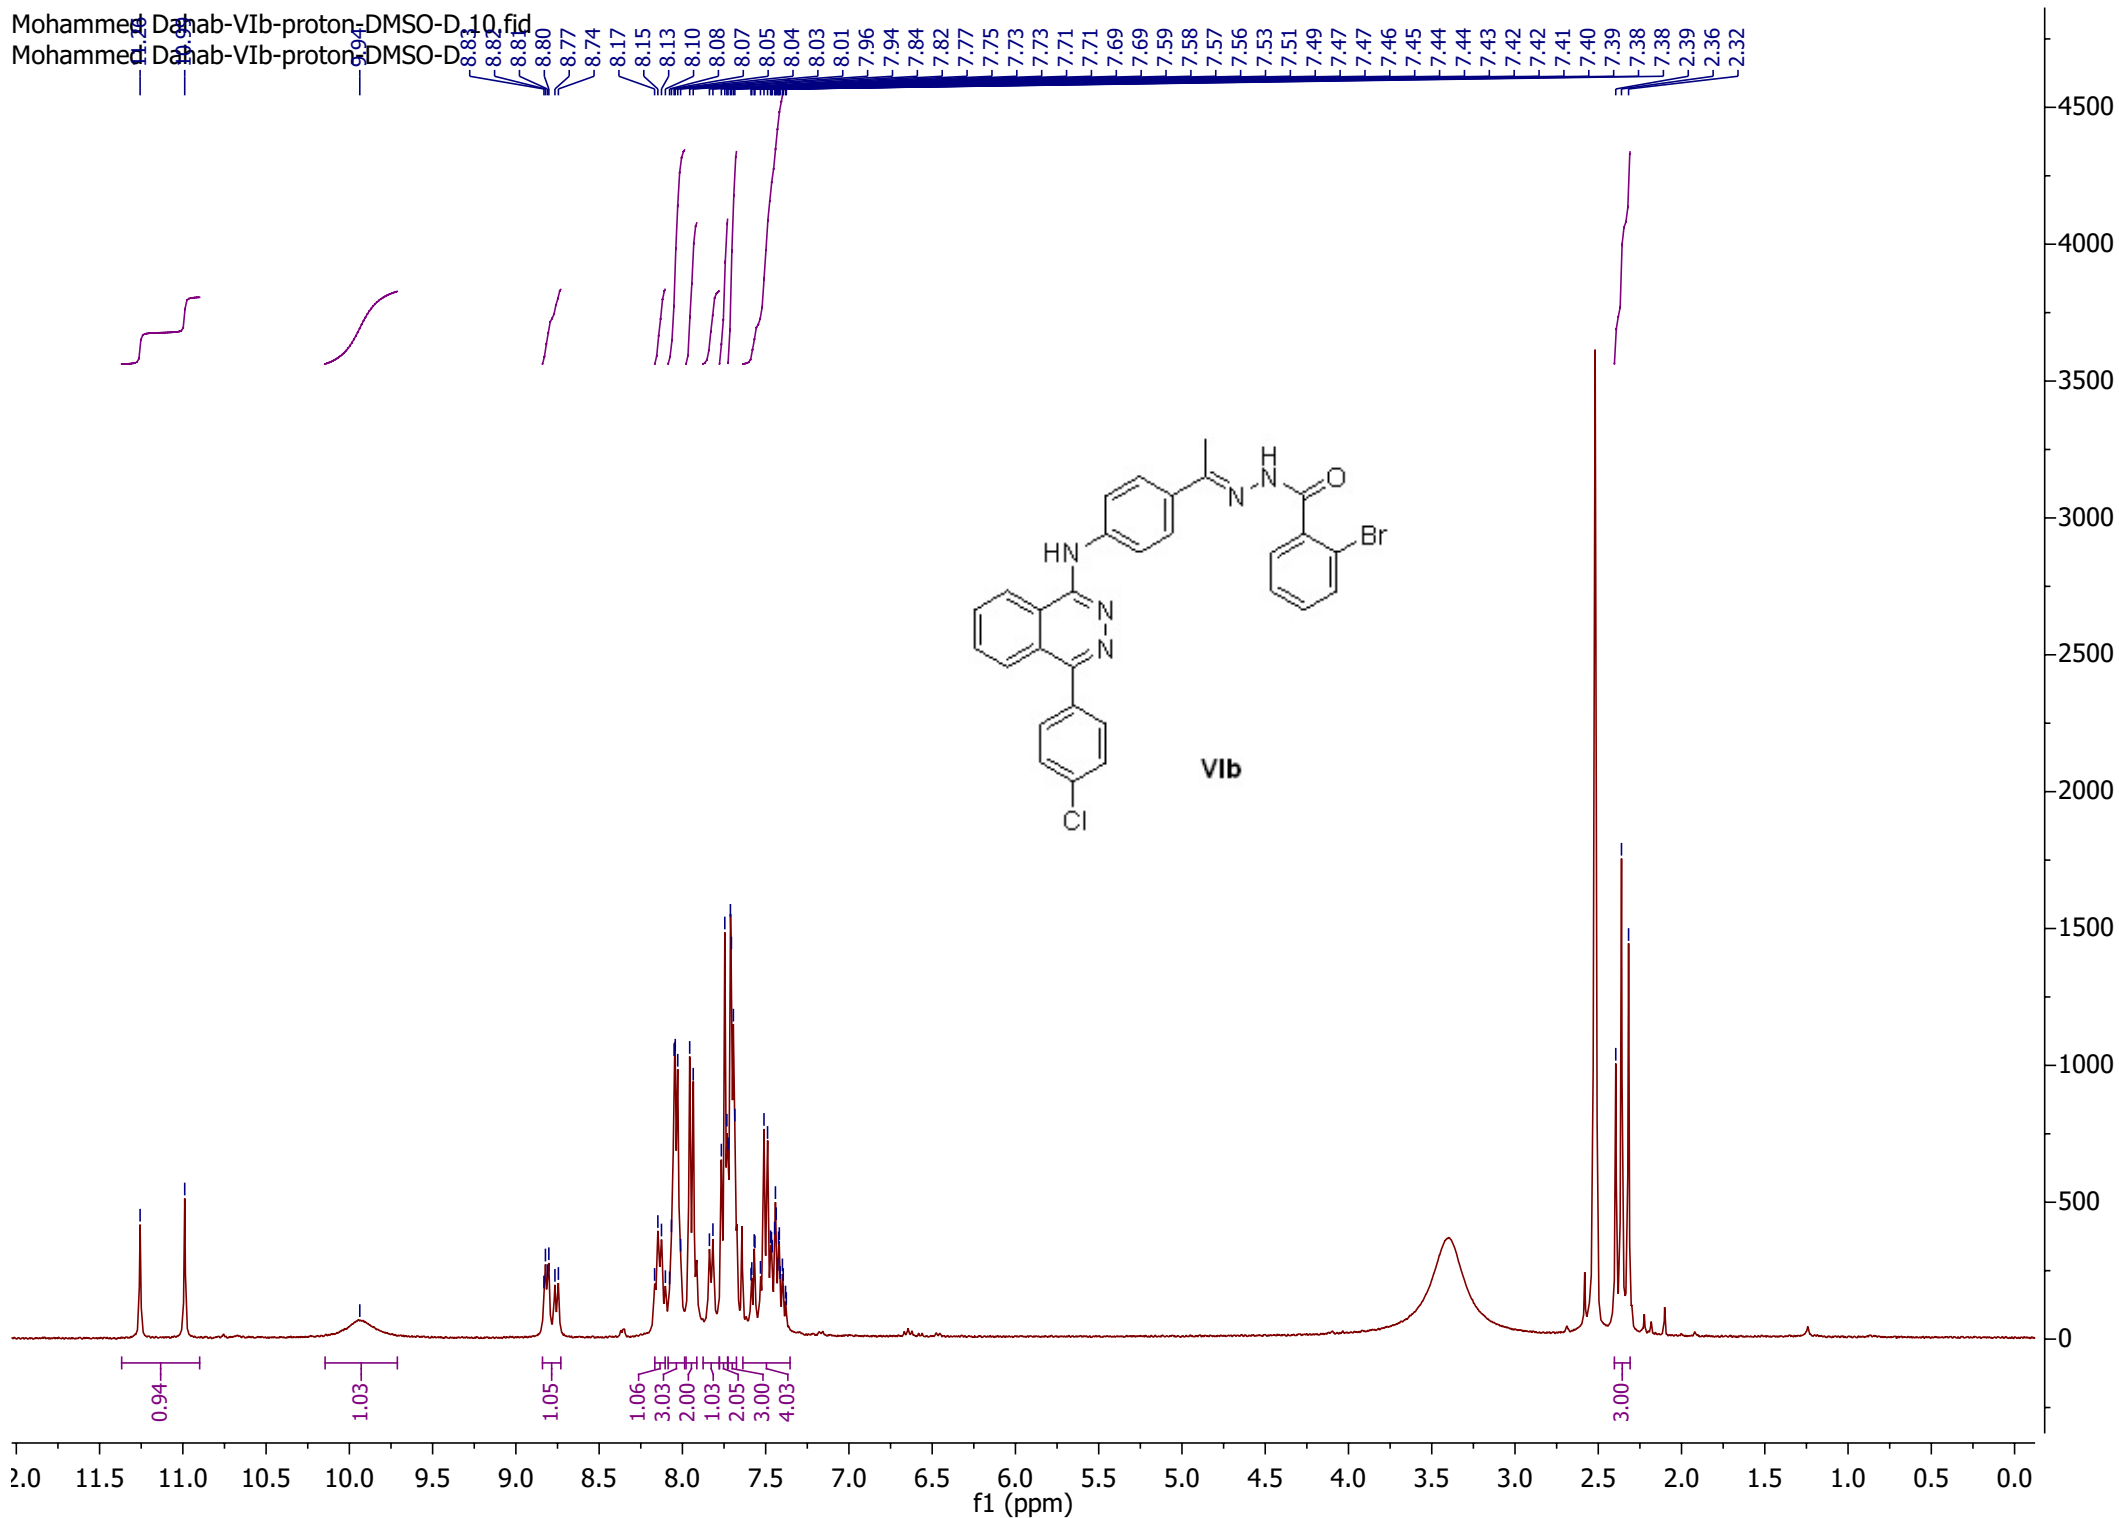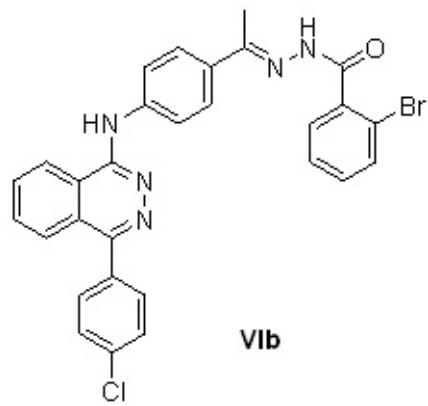

Mohammed Dahab-FD12-Hnmr-RR.10.fid  
Mohammed Dahab-FD12-Hnmr-RR

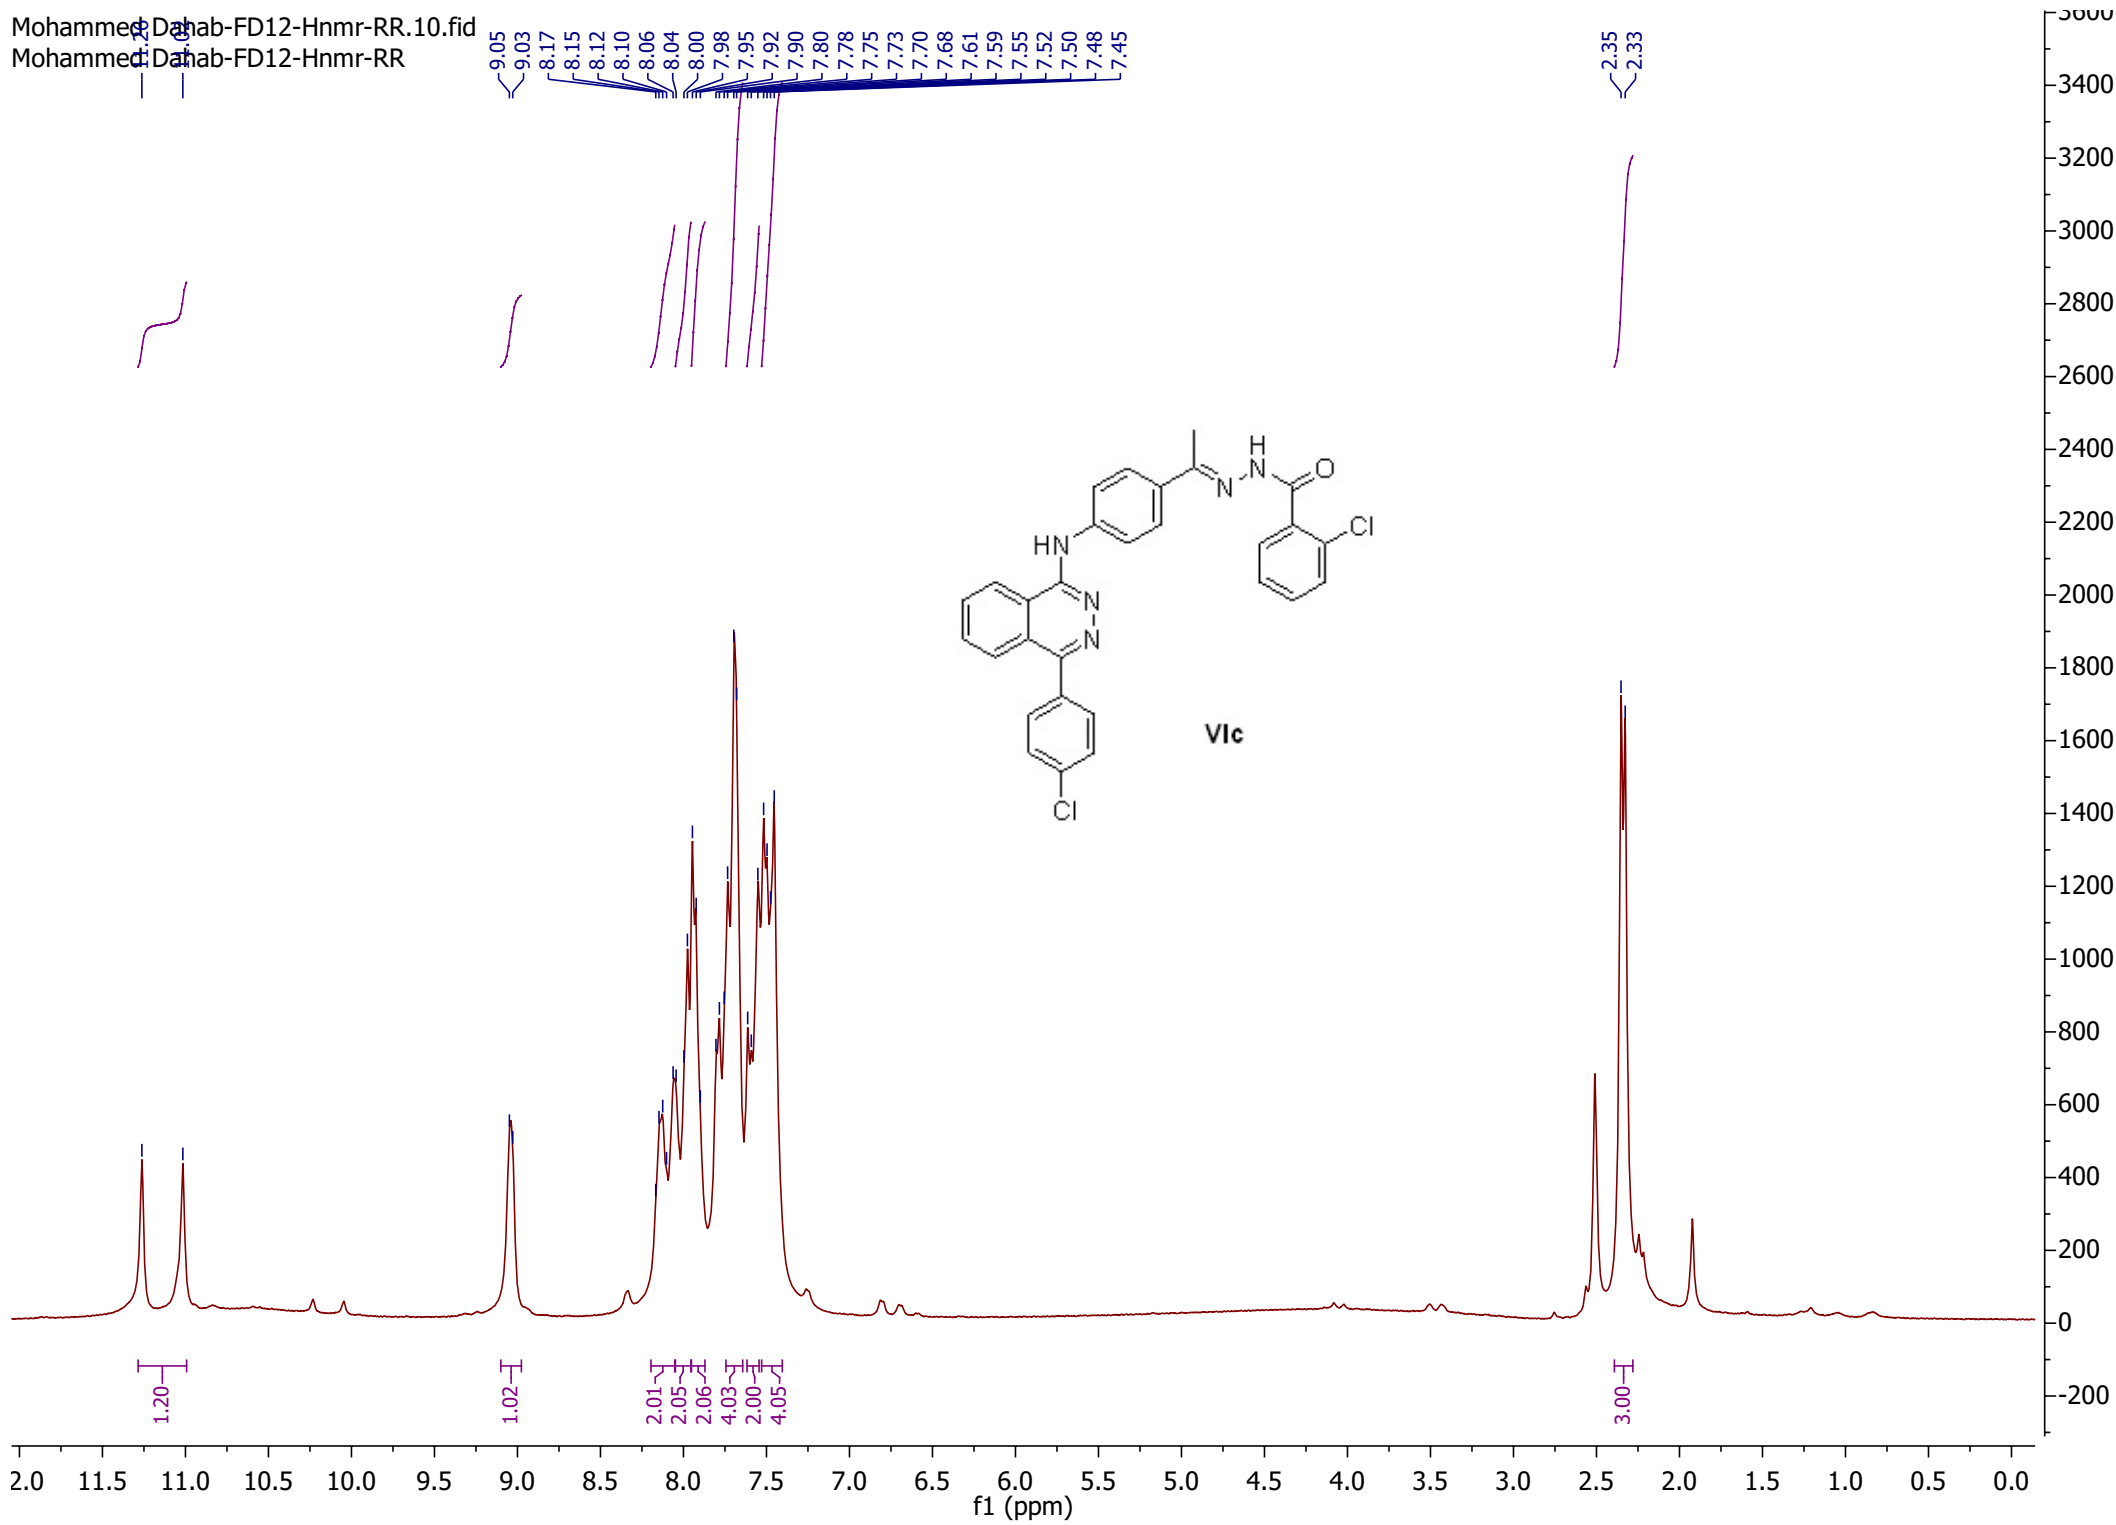

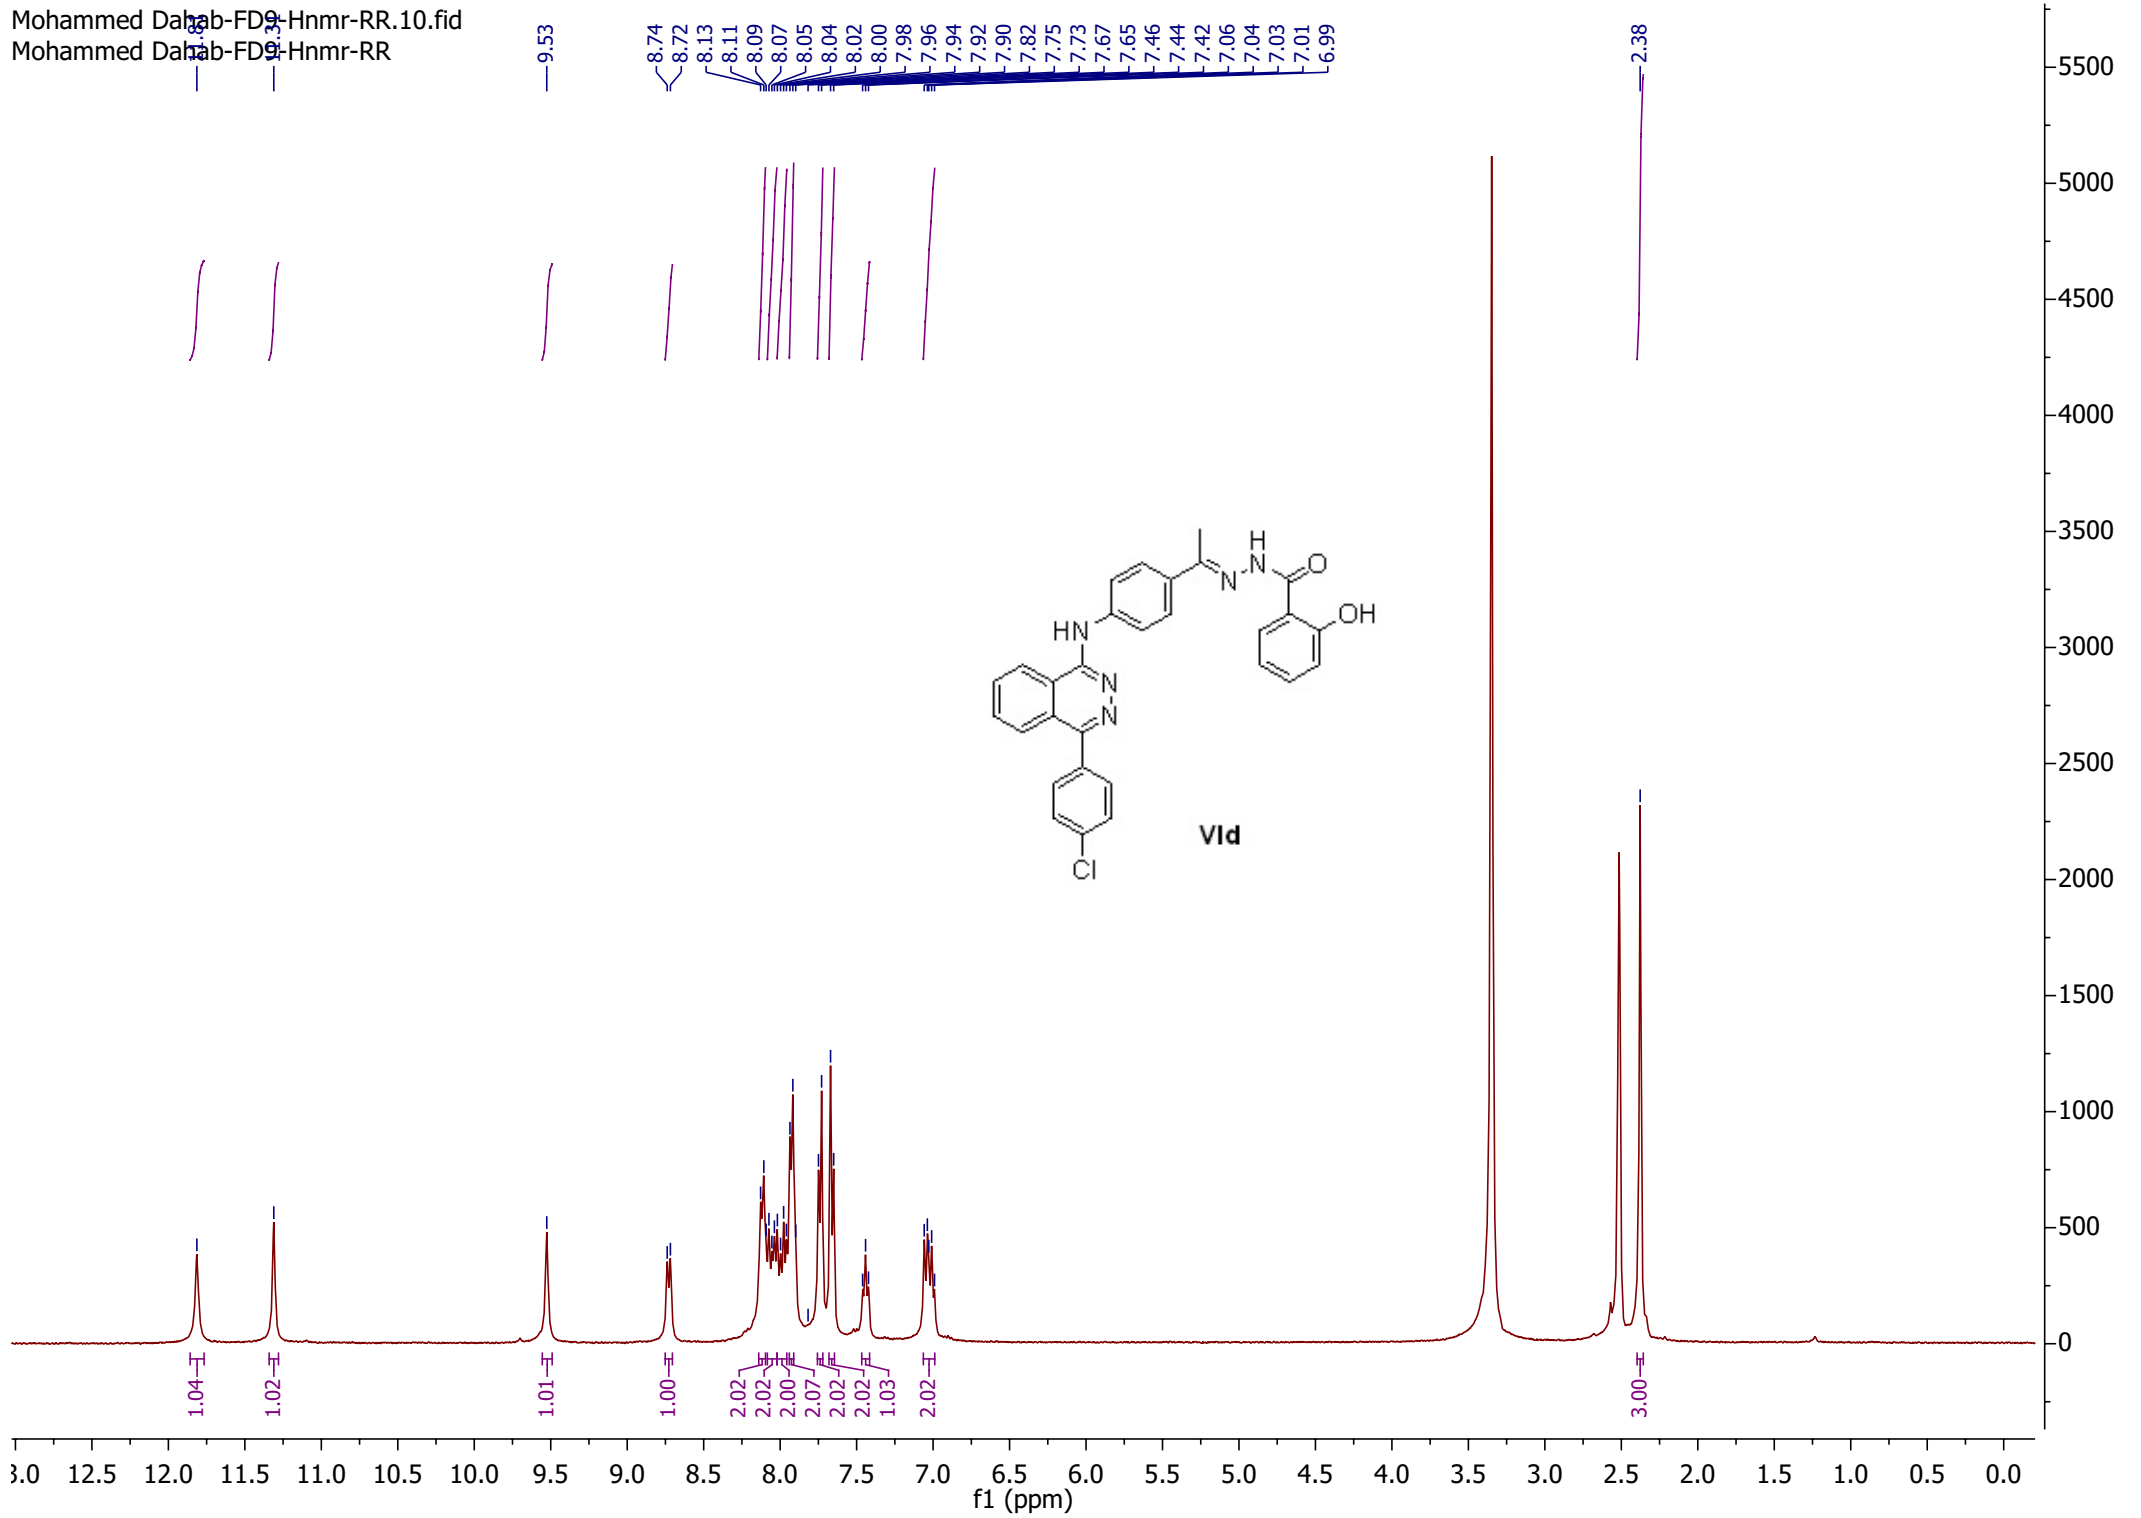

Mohammed Dahab-FD10-Hnmr-RR\_10.fid  
Mohammed Dahab-FD10-Hnmr-RR

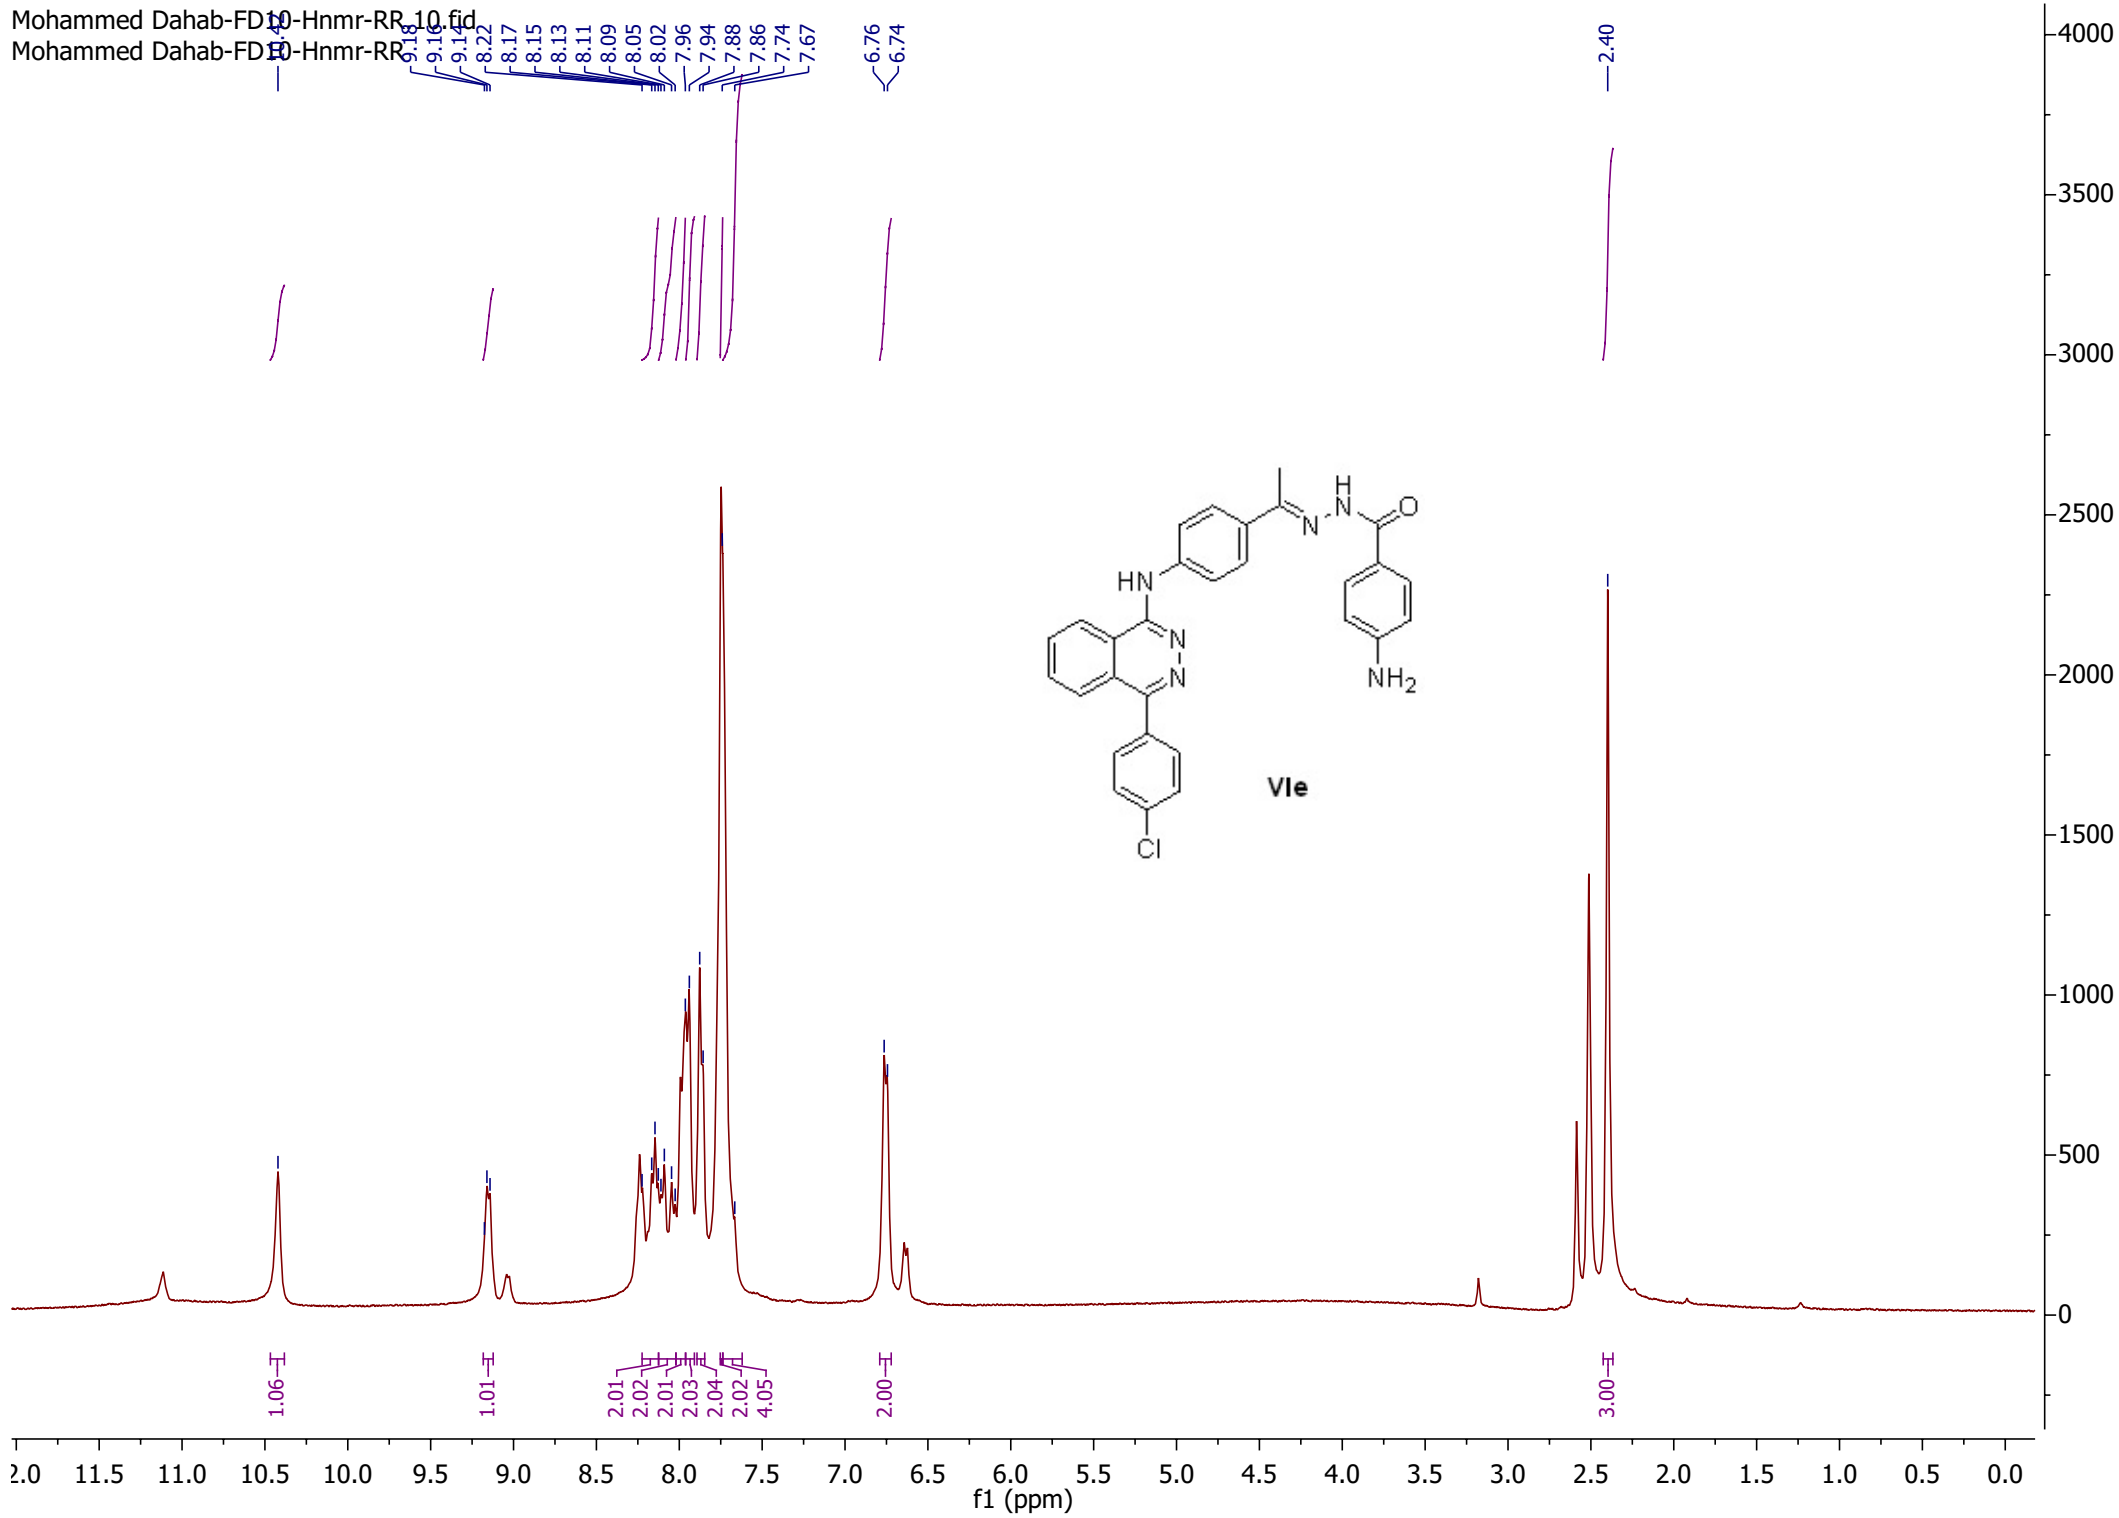

Mohammed Dahab-FD7-Hnmr-RR.10.fid  
Mohammed Dahab-FD7-Hnmr-RR

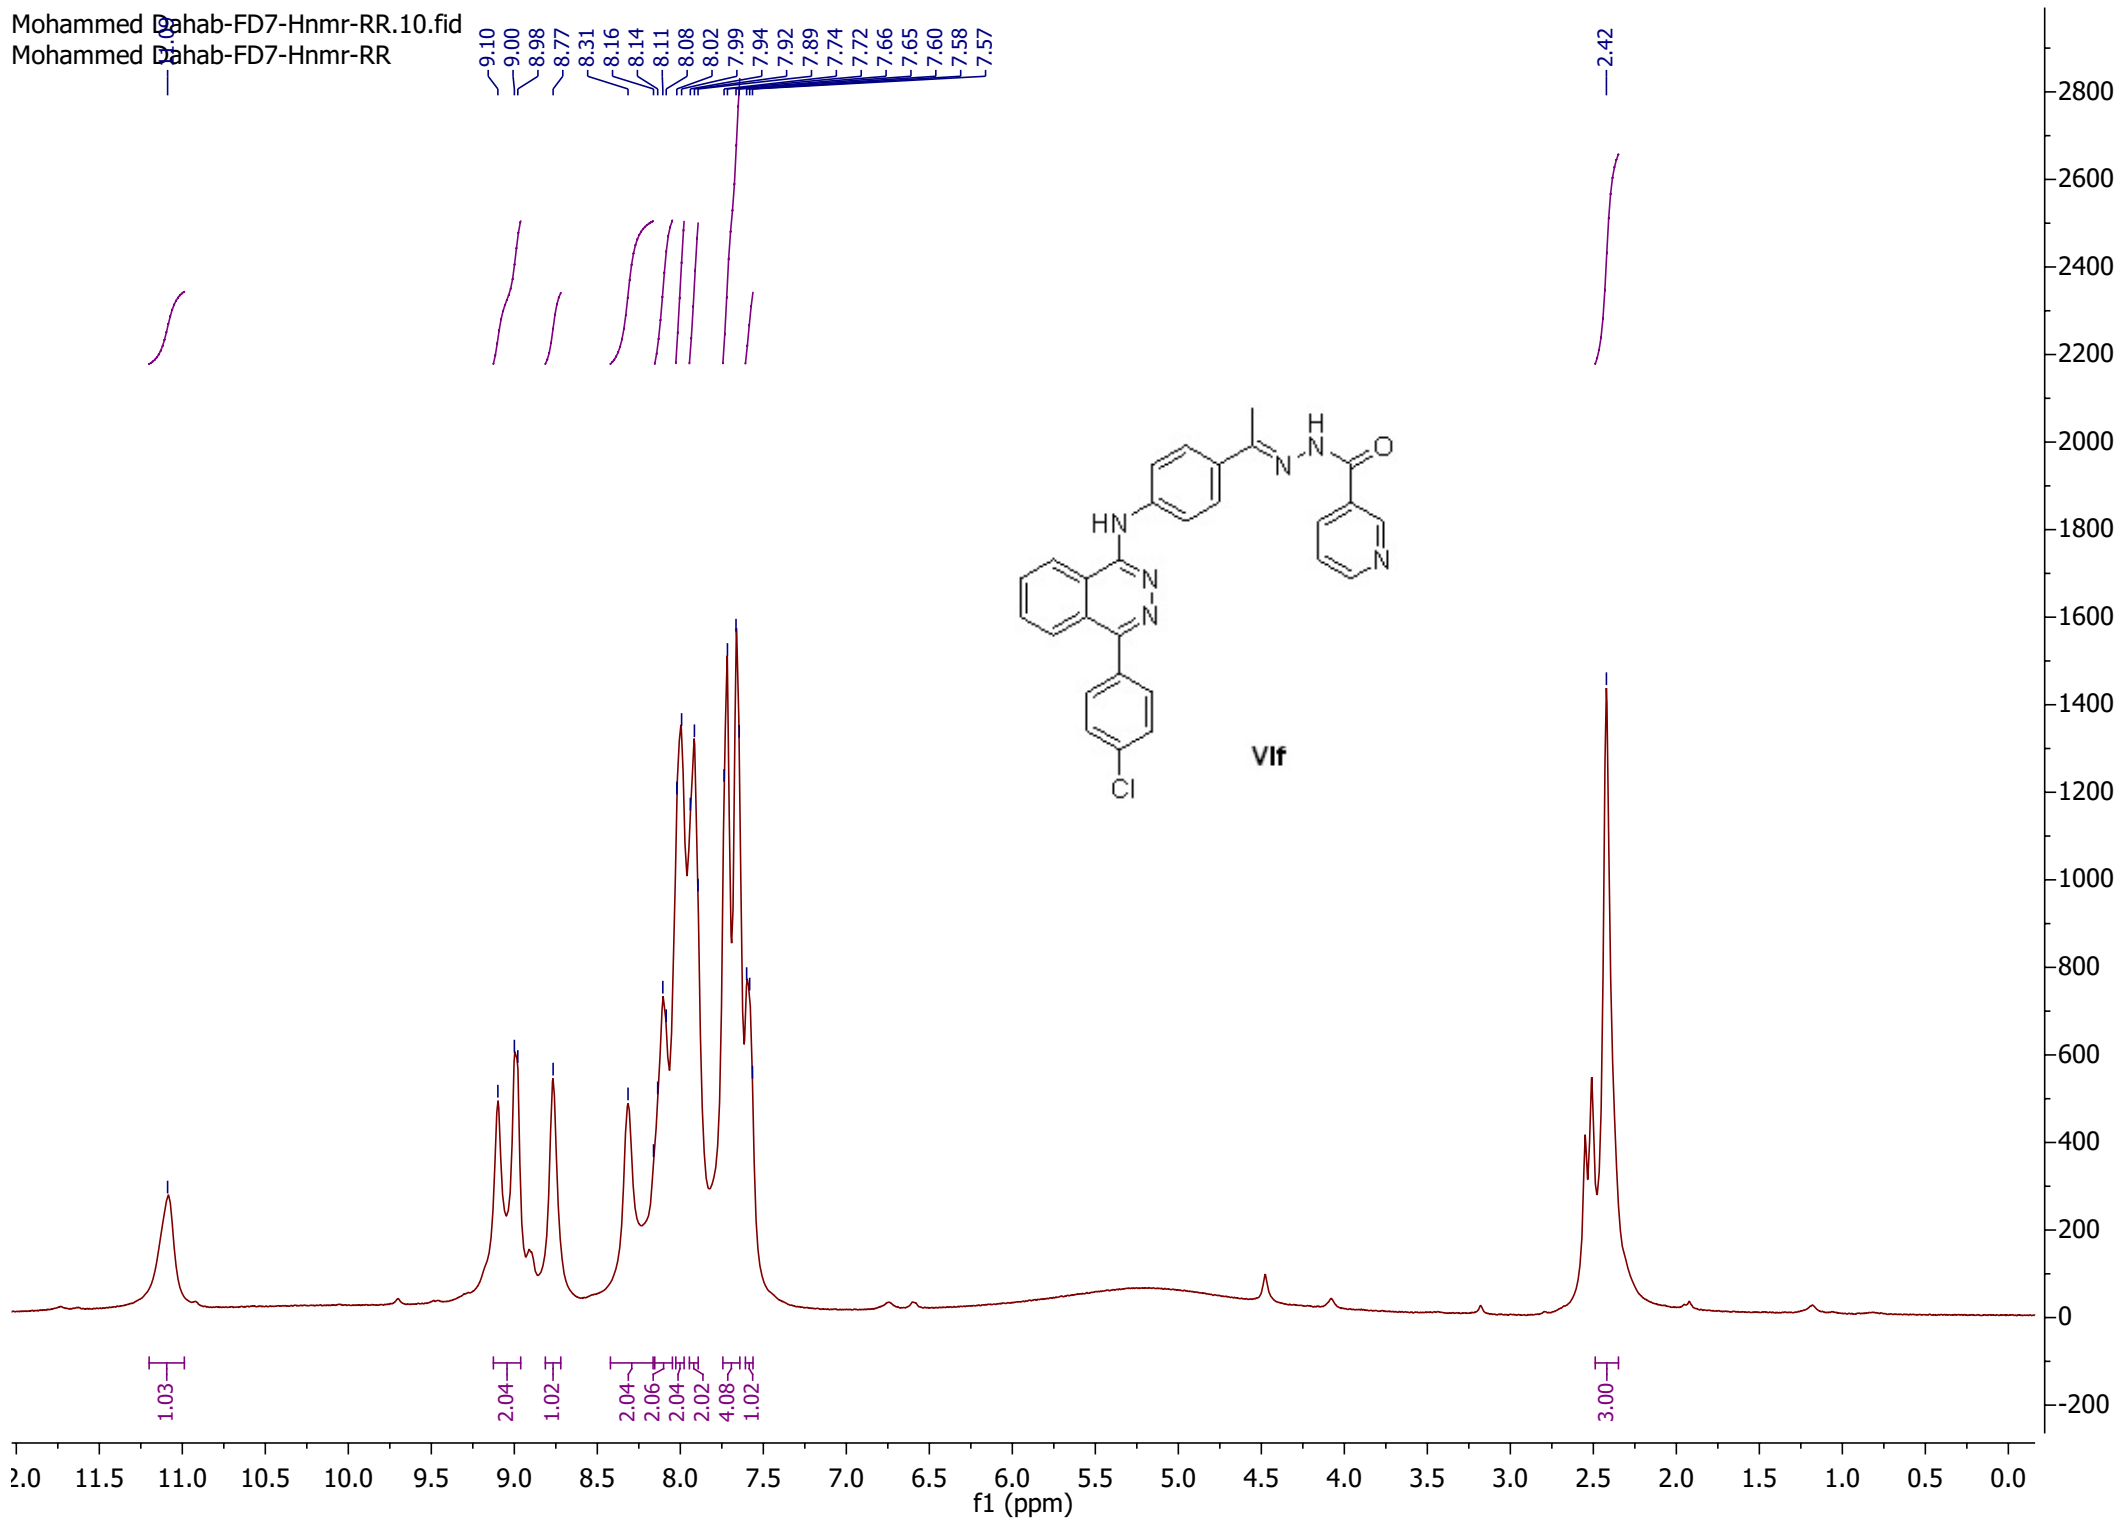

Mohammed Dahab-FD6-Hnmr-RR.10.fid  
Mohammed Dahab-FD6-Hnmr-RR

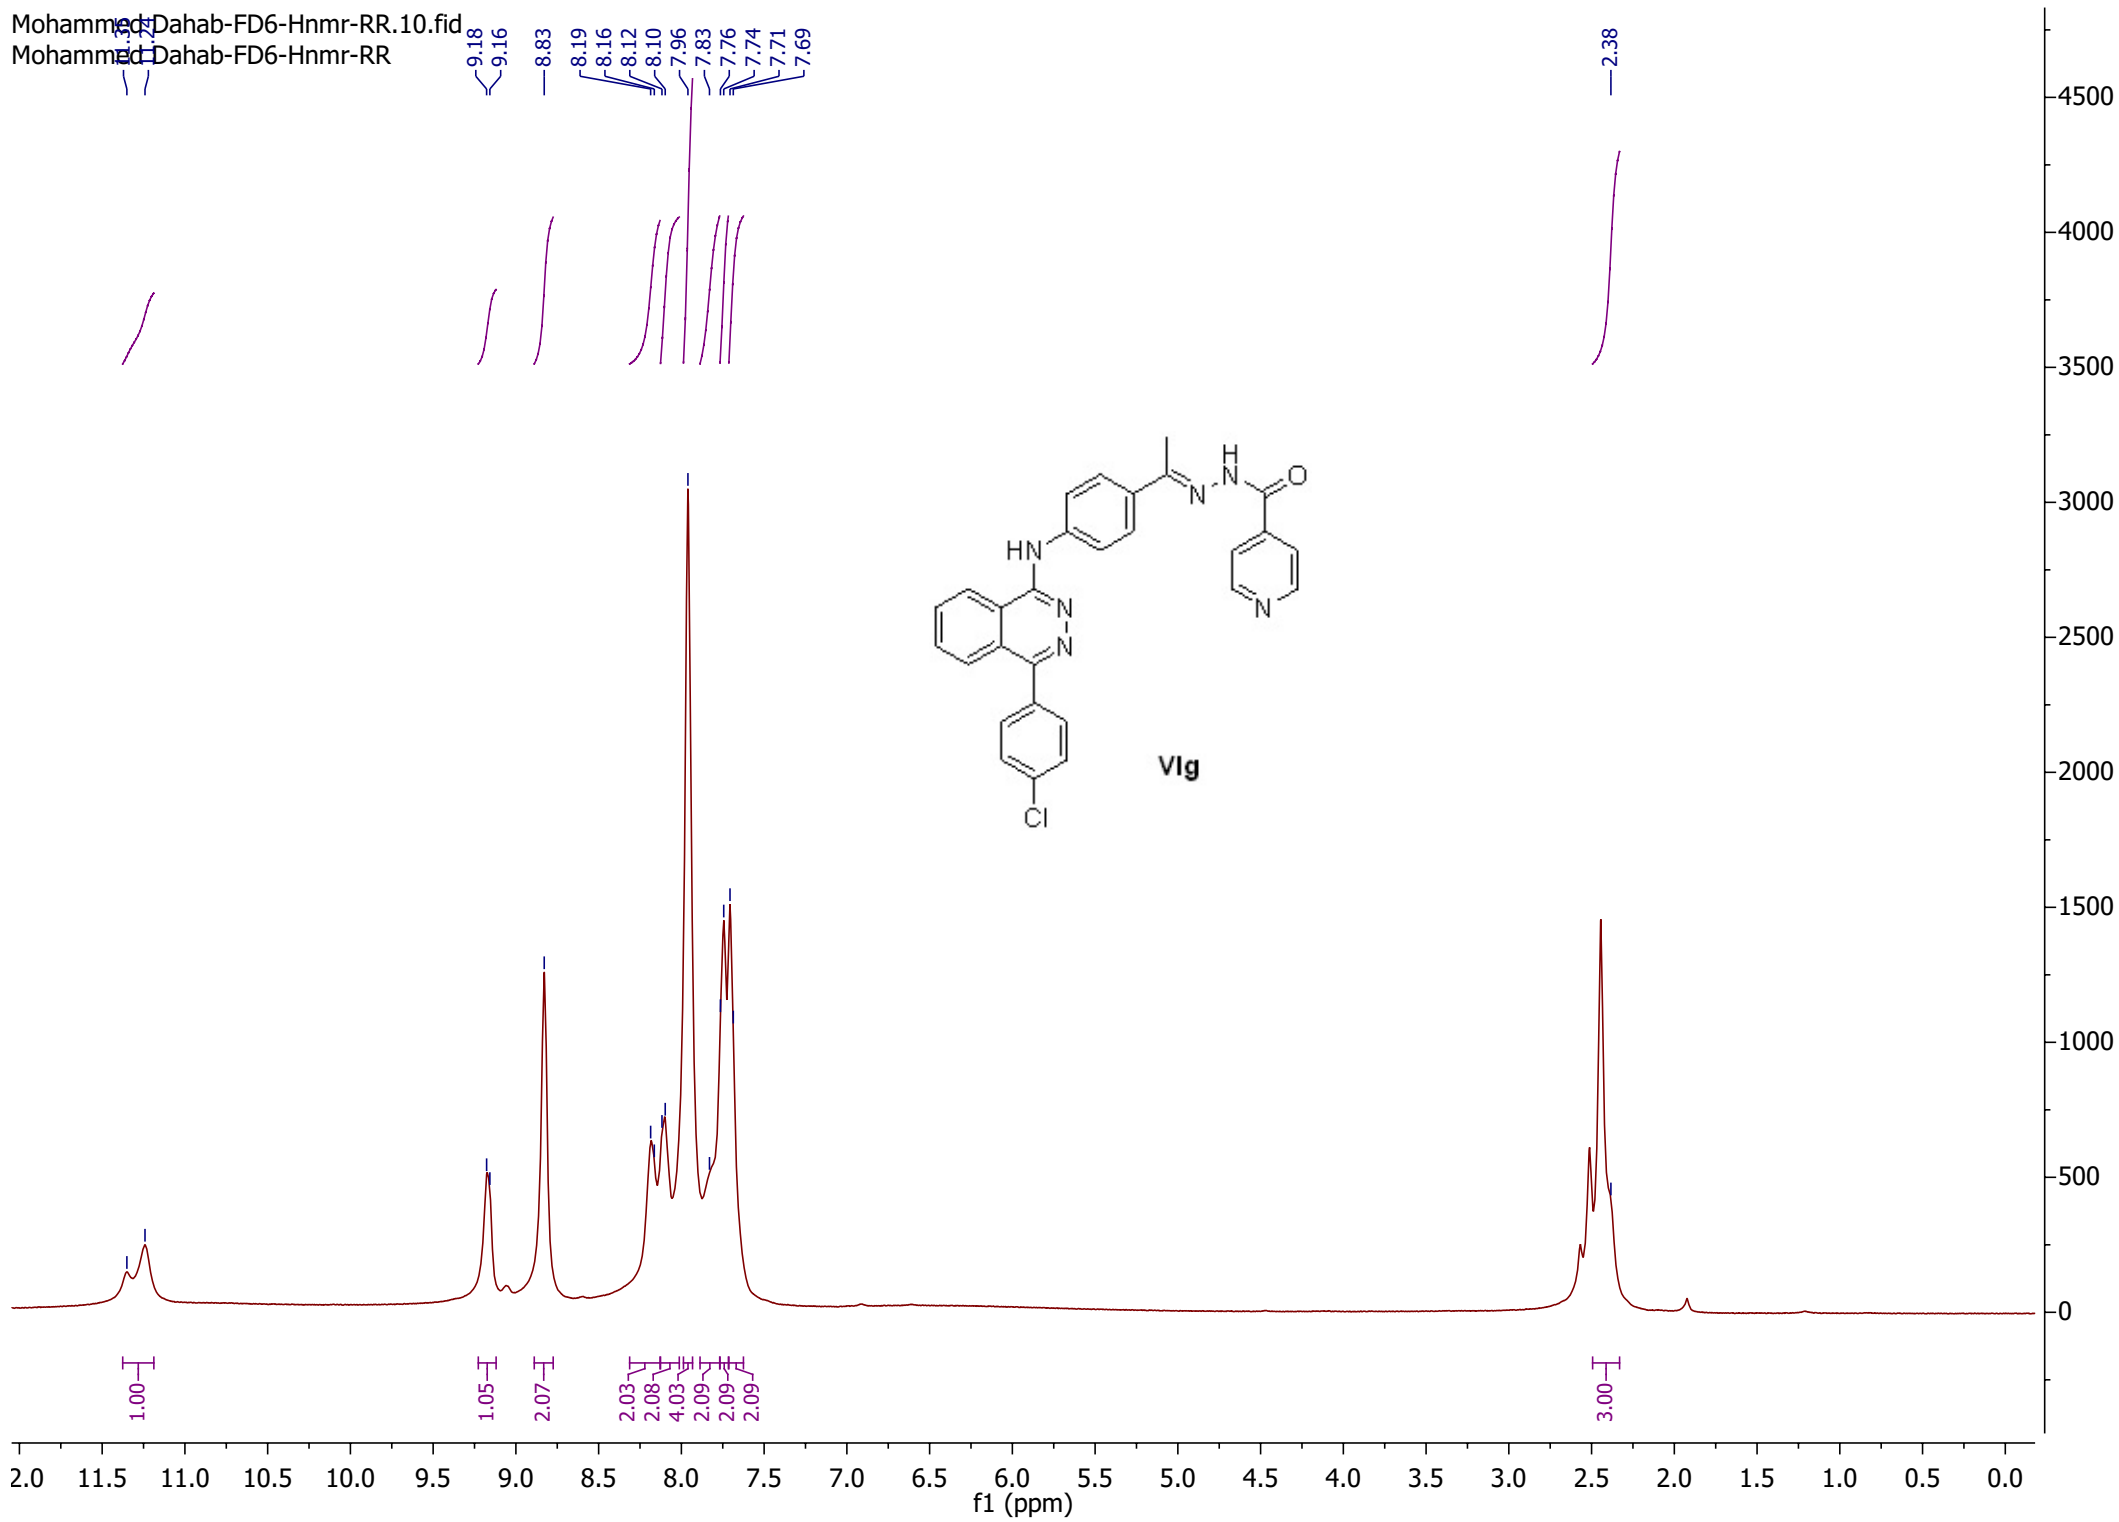



Mohammed Dahab-FD15-Hmm-RR-102.fid  
Mohammed Dahab-FD15-Hmm-RR

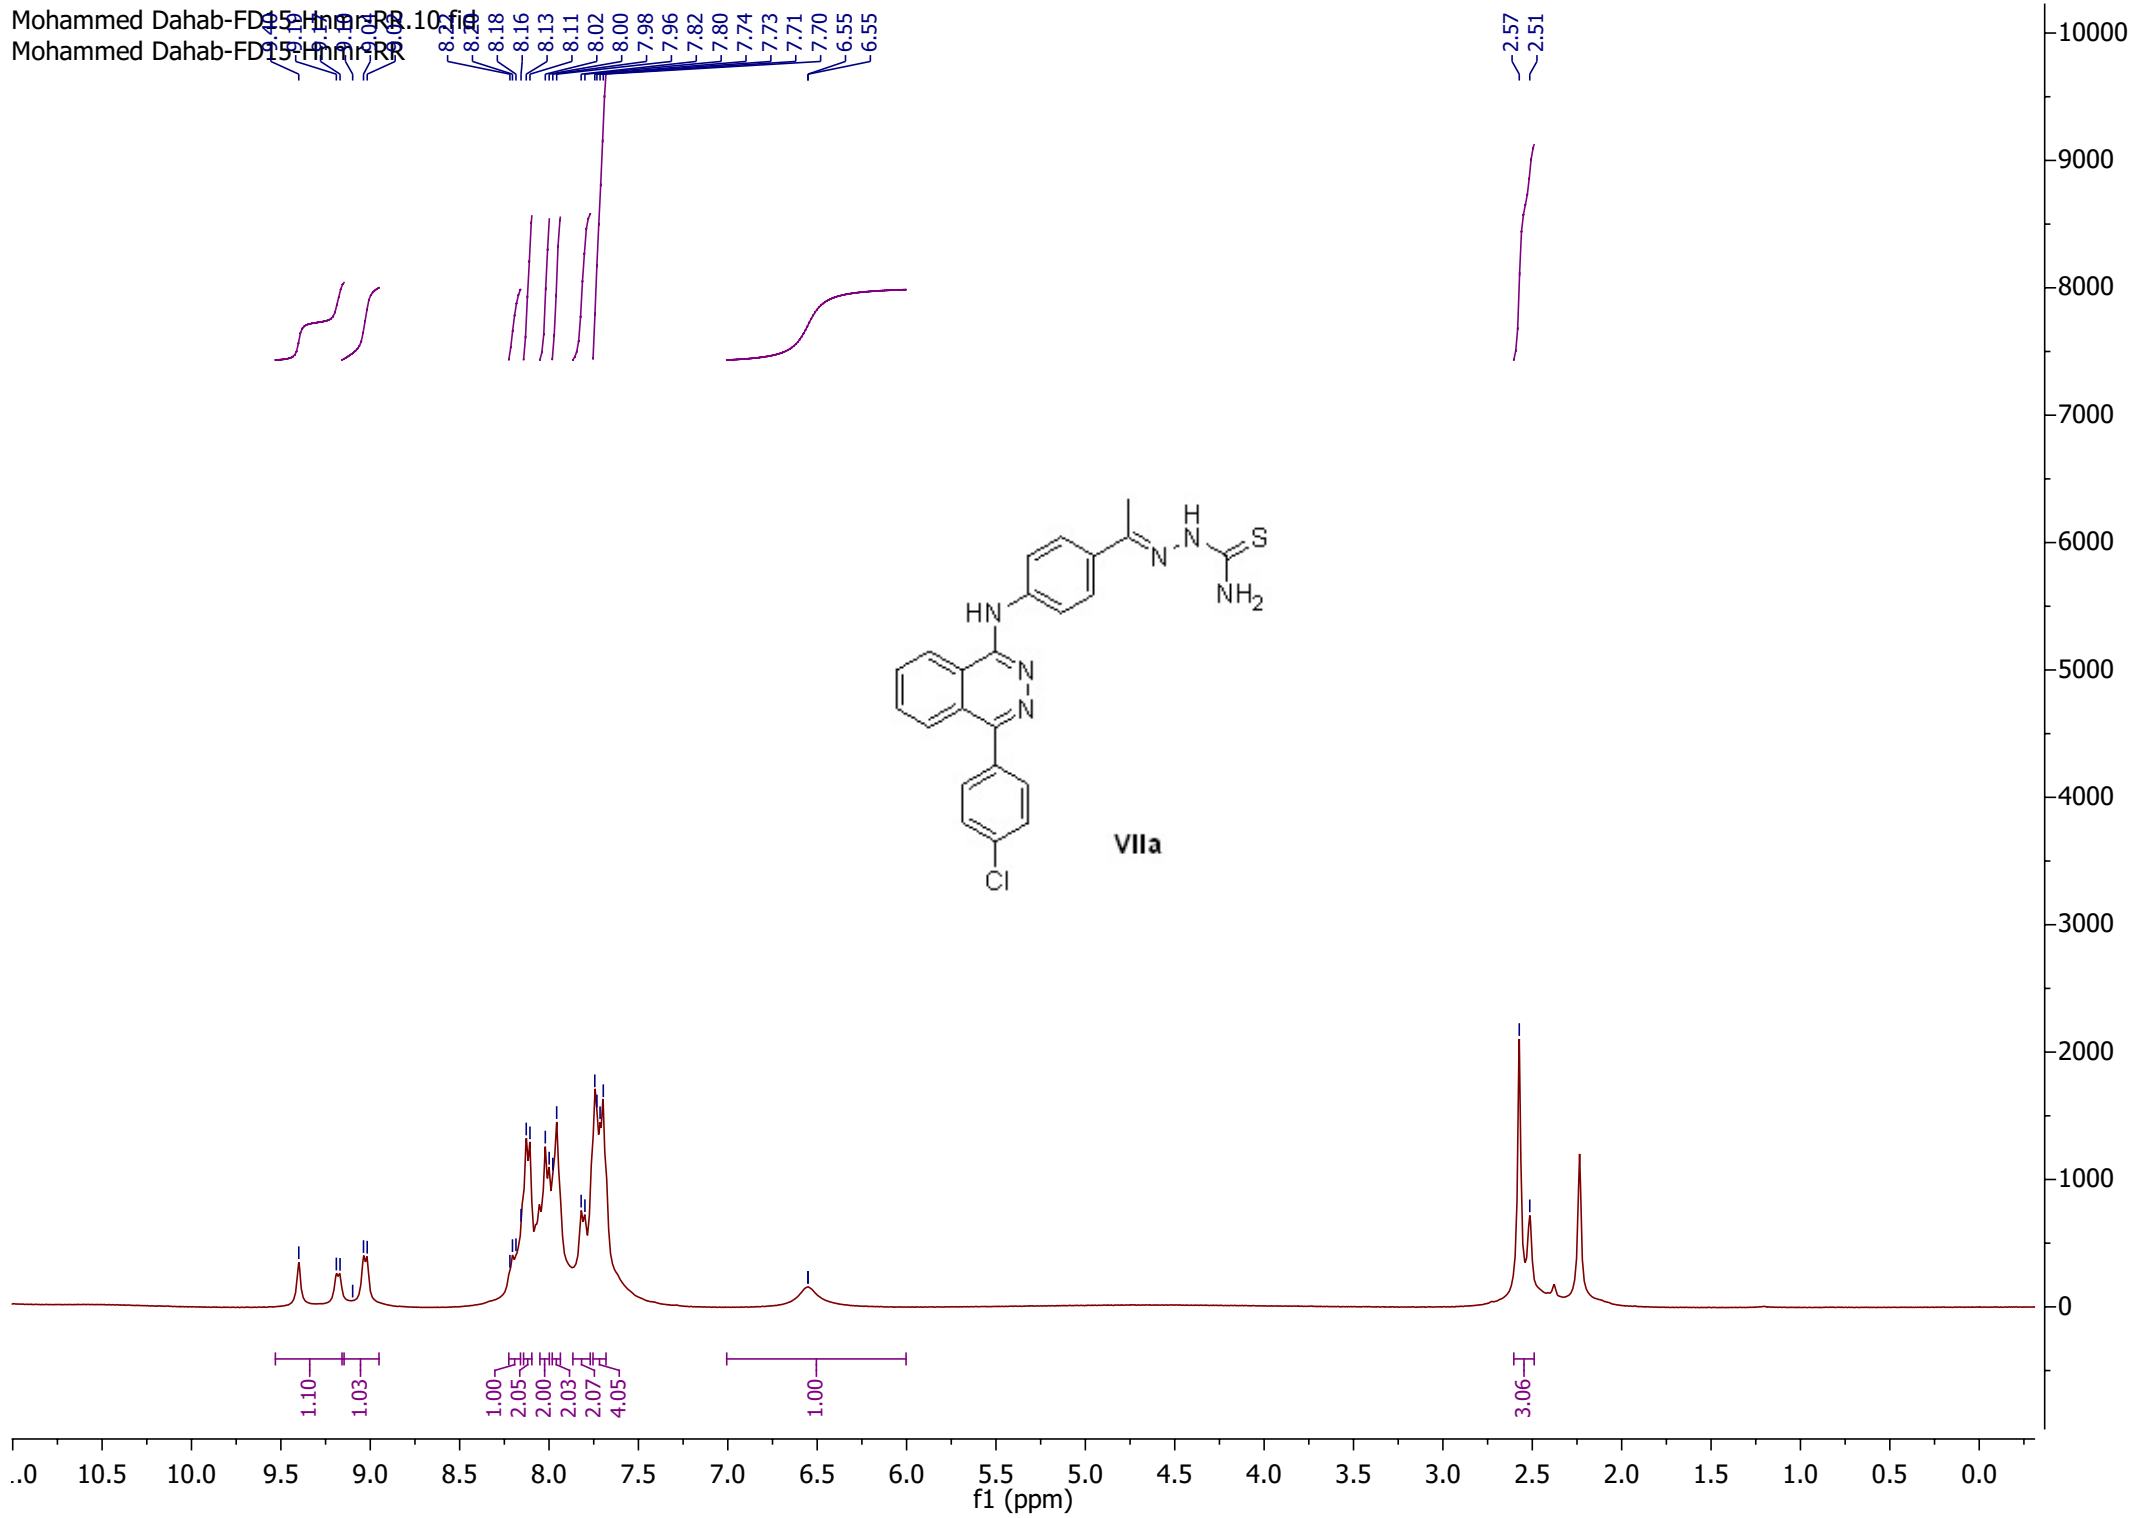

Supplement: d4ra03459g3.pdf [file d4ra03459g3.pdf]
